# Supplementary material for: Proteomic Analysis of Non-human Primate Peripheral Blood Mononuclear Cells During Burkholderia mallei Infection Reveals a Role of Ezrin in Glanders Pathogenesis
Source: Front Microbiol. 2021 Apr 22;12:625211. doi: 10.3389/fmicb.2021.625211 (PMC8101288; doi:10.3389/fmicb.2021.625211)
Supplement: Supplementary Table 2 — The primer sequences used for the real-time PCR in this study. [file Table_2.XLSX]

## Sheet: qPCR primer sequence
Forward Sequence Name	Sequence		Reverse Sequence Name	Sequence
Mm_Ccl12_F	ATT TCC ACA CTT CTA TGC CTC CT		Mm_Ccl12_R	ATC CAG TAT GGT CCT GAA GAT CA
Mm_Ccl17_F	TAC CAT GAG GTC ACT TCA GAT GC		Mm_Ccl17_R	GCA CTC TCG GCC TAC ATT GG
Mm_Ccl2_F	TTA AAA ACC TGG ATC GGA ACC AA		Mm_Ccl2_R	GCA TTA GCT TCA GAT TTA CGG GT
Mm_Ccl3_F	TTC TCT GTA CCA TGA CAC TCT GC		Mm_Ccl3_R	CGT GGA ATC TTC CGG CTG TAG
Mm_Ccl4_F	TTC CTG CTG TTT CTC TTA CAC CT		Mm_Ccl4_R	CTG TCT GCC TCT TTT GGT CAG
Mm_Ccl5_F	GCT GCT TTG CCT ACC TCT CC		Mm_Ccl5_R	TCG AGT GAC AAA CAC GAC TGC
Mm_Ccl7_F	GCT GCT TTC AGC ATC CAA GTG		Mm_Ccl7_R	CCA GGG ACA CCG ACT ACT G
Mm_Ccl9_F	CCC TCT CCT TCC TCA TTC TTA CA		Mm_Ccl9_R	AGT CTT GAA AGC CCA TGT GAA A
Mm_Cxcl10_F	CCA AGT GCT GCC GTC ATT TTC		Mm_Cxcl10_R	GGC TCG CAG GGA TGA TTT CAA
Mm_Il1b_F	GCA ACT GTT CCT GAA CTC AAC T		Mm_Il1b_R	ATC TTT TGG GGT CCG TCA ACT
Mm_Il1rn_F	GCT CAT TGC TGG GTA CTT ACA A		Mm_Il1rn_R	CCA GAC TTG GCA CAA GAC AGG
Mm_Csf2_F	GGC CTT GGA AGC ATG TAG AGG		Mm_Csf2_R	GGA GAA CTC GTT AGA GAC GAC TT
Mm_Csf3_F	ATG GCT CAA CTT TCT GCC CAG		Mm_Csf3_R	CTG ACA GTG ACC AGG GGA AC
Mm_Tnf_F	GAC GTG GAA CTG GCA GAA GAG		Mm_Tnf_R	TTG GTG GTT TGT GAG TGT GAG
