# Supplementary material for: Proteomic Analysis of Non-human Primate Peripheral Blood Mononuclear Cells During Burkholderia mallei Infection Reveals a Role of Ezrin in Glanders Pathogenesis
Source: Front Microbiol. 2021 Apr 22;12:625211. doi: 10.3389/fmicb.2021.625211 (PMC8101288; doi:10.3389/fmicb.2021.625211)
Supplement: Supplementary Table 3 — Hierarchical clustering of the proteomic data. Tab “Data” is the underlying data for Figure 2. African Green monkey (AGM), cynomolgus macaques (CM) and rhesus macaques (RM). [file Table_3.XLSX]

## Sheet: Data 
GID	GENE	NAME	GWEIGHT	AGM_Log10FC_1	AGM_Log10FC_2	AGM_Log10FC_3	AGM_Log10FC_4	CM_Log10FC_1	CM_Log10FC_2	CM_Log10FC_3	CM_Log10FC_4	CM_Log10FC_5	RM_Log10FC_1	RM_Log10FC_2	RM_Log10FC_3	RM_Log10FC_4	RM_Log10FC_5	RM_Log10FC_6	emPAI.AGM.pre.1	emPAI.AGM.pre.2	emPAI.AGM.pre.3	emPAI.AGM.pre.4	emPAI.AGM.post.1	emPAI.AGM.post.2	emPAI.AGM.post.3	emPAI.AGM.post.4	emPAI.CM.pre.1	emPAI.CM.pre.2	emPAI.CM.pre.3	emPAI.CM.pre.4	emPAI.CM.pre.5	emPAI.CM.post.1	emPAI.CM.post.2	emPAI.CM.post.3	emPAI.CM.post.4	emPAI.CM.post.5	emPAI.RM.pre.1	emPAI.RM.pre.2	emPAI.RM.pre.3	emPAI.RM.pre.4	emPAI.RM.pre.5	emPAI.RM.pre.6	emPAI.RM.post.1	emPAI.RM.post.2	emPAI.RM.post.3	emPAI.RM.post.4	emPAI.RM.post.5	emPAI.RM.post.6
EWEIGHT				1	1	1	1	1	1	1	1	1	1	1	1	1	1	1	1	1	1	1	1	1	1	1	1	1	1	1	1	1	1	1	1	1	1	1	1	1	1	1	1	1	1	1	1	1
GENE6X	90316	90316|TGIF2LX|TGFB-induced factor homeobox 2-like, X-linked	1	-3.34	-3.34	-3.34	0	0	0	0	0	0	0	0	0	0	0	0	1.91	1.91	1.91	0	0.008	0.008	0.008	0	0	0	0	0	0	0	0	0	0	0	0	0	0	0	0	0	0	0	0	0	0	0
GENE7X	440822	440822|PIWIL3|piwi-like 3 (Drosophila)	1	0	0	-5.75	0	0.408	0	0	0	0	0	0	0	0	0	0	0	0	3.29	0	0	0	0.005	0	0.005	0	0	0	0	0.229	0	0	0	0	0	0	0	0	0	0	0	0	0	0	0	0
GENE61X	3273	3273|HRG|histidine-rich glycoprotein	1	0	0	0	0	2.84	0	2.42	0.502	0	0	3.12	2.32	2.1	0	3.3	0	0	0	0	0	0	0	0	0.003	0	0.003	0.003	0	1.62	0	1.38	0.289	0	0	0.003	0.003	0.003	0	0.003	0	1.78	1.32	1.2	0	1.89
GENE36X	92815	92815|HIST3H2A|histone cluster 3, H2a	1	0	0	0	0	3.51	0	3.07	0	0	1.01	2.21	0	2.21	0	2.91	0	0	0	0	0	0	0	0	0.002	0	0.002	0	0	2.01	0	1.75	0	0	1.26	0.002	0	0.002	0	0.002	1.84	1.26	0	1.26	0	1.67
GENE84X	8335	8335|HIST1H2AB|histone cluster 1, H2ab	1	0	0	0	0	0	0	0	0	0	1.35	2.94	0	2.94	0	3.89	0	0	0	0	0	0	0	0	0	0	0	0	0	0	0	0	0	0	1.68	0.003	0	0.003	0	0.003	2.45	1.68	0	1.68	0	2.22
GENE56X	3012	3012|HIST1H2AE|histone cluster 1, H2ae	1	0	0	0	0	0	0	0	0	0	1.24	2.7	2.93	2.7	0	3.56	0	0	0	0	0	0	0	0	0	0	0	0	0	0	0	0	0	0	1.54	0.003	0.003	0.003	0	0.003	2.25	1.54	1.68	1.54	0	2.04
GENE114X	100528017	100528017|SAA2-SAA4|SAA2-SAA4 readthrough	1	0	0	0	0	0	0	0	0	0	1.74	3.45	3.45	1.74	1.74	3.15	0	0	0	0	0	0	0	0	0	0	0	0	0	0	0	0	0	0	0.003	0.003	0.003	0.003	0.003	0.003	0.994	1.97	1.97	0.994	0.994	1.8
GENE73X	6288	6288|SAA1|serum amyloid A1	1	0	0	0	0	0	0	0	0	0	2.53	3.36	2.99	2.27	2.45	2.46	0	0	0	0	0	0	0	0	0	0	0	0	0	0	0	0	0	0	0.002	0.002	0.002	0.002	0.002	0.002	1.44	1.92	1.7	1.3	1.4	1.4
GENE68X	5355	5355|PLP2|proteolipid protein 2 (colonic epithelium-enriched)	1	0	0	0	0	-1.92	2.4	2.4	0	0	2.4	2.4	2.4	0	0	2.4	0	0	0	0	0	0	0	0	2.47	0.004	0.004	0	0	1.37	1.37	1.37	0	0	0.004	0.004	0.004	0	0	0.004	1.37	1.37	1.37	0	0	1.37
GENE55X	3008	3008|HIST1H1E|histone cluster 1, H1e	1	0.953	0.495	-0.997	-1.3	0.083	1.02	2.82	0	-2.13	0.569	2.23	2.11	0.407	3.11	0.374	0.002	1.49	1.61	1.29	0.545	1.77	1.04	0.545	1.56	1.03	0.002	1.43	1.21	1.61	1.61	1.61	1.43	0.002	1.35	0.002	0.002	1.24	0.002	1.35	1.67	1.28	1.2	1.47	1.78	1.56
GENE89X	10525	10525|HYOU1|hypoxia up-regulated 1	1	0	0	0	0	0.965	0	0.777	0	0	3.7	3.78	0.777	0	3.02	0	0	0	0	0	0	0	0	0	1.04	0	0.003	0.003	0	1.6	0	0.45	0.003	0	0.003	0.003	0.003	0	0.003	0.003	2.11	2.16	0.45	0	1.72	0.003
GENE65X	4900	4900|NRGN|neurogranin (protein kinase C substrate, RC3)	1	0	0	0	0	0	0	0	0	0	3.83	2.91	0	0	3.83	0	0	0	0	0	0	0	0	0	0	0	0	0	0	0	0	0	0	0	0.004	0.004	0	0	0.004	0	2.19	1.65	0	0	2.19	0
GENE90X	11021	11021|RAB35|RAB35, member RAS oncogene family	1	0	0	0	0	0	0	0	0	0	3.4	3.83	0	0	3.4	0	0	0	0	0	0	0	0	0	0	0	0	0	0	0	0	0	0	0	0.004	0.004	0	0	0.004	0	1.95	2.19	0	0	1.95	0
GENE106X	83658	83658|DYNLRB1|dynein, light chain, roadblock-type 1	1	0	0	0	0	0	0	0	0	0	2.89	4.57	0	0	2.89	0	0	0	0	0	0	0	0	0	0	0	0	0	0	0	0	0	0	0	0.004	0.004	0	0	0.004	0	1.66	2.6	0	0	1.66	0
GENE72X	6280	6280|S100A9|S100 calcium binding protein A9	1	0	0	0	0	-1.55	0	0	0	0	3.01	3.68	1.94	0	2.76	0	0	0	0	0	0	0	0	0	0.886	0	0	0	0	0.003	0	0	0	0	0.003	0.619	0.003	0	0.003	0	1.72	2.72	1.1	0	1.57	0
GENE53X	2787	2787|GNG5|guanine nucleotide binding protein (G protein), gamma 5	1	0	0	0	0	0	0	0	0	0	3.95	2.99	2.99	0	0.954	0	0	0	0	0	0	0	0	0	0	0	0	0	0	0	0	0	0	0	0.004	0.004	0.004	0	1.71	0	2.25	1.71	1.71	0	2.25	0
GENE77X	7168	7168|TPM1|tropomyosin 1 (alpha)	1	0	0	0	0	-0.106	0	0	0	0	3.56	0.955	3.25	0	3.13	0	0	0	0	0	0	0	0	0	1.67	0	0	0	0	1.61	0	0	0	0	0.002	1.4	0.002	0	0.002	0	2.03	1.94	1.86	0	1.79	0
GENE102X	55276	55276|PGM2|phosphoglucomutase 2	1	0	0	0	0	0.71	0	1.17	0	0	3.44	0.838	3.44	0	3.44	0	0	0	0	0	0	0	0	0	0.264	0	0.003	0	0	0.669	0	0.669	0	0	0.003	1.49	0.003	0	0.003	0	1.97	1.97	1.97	0	1.97	0
GENE59X	3094	3094|HINT1|histidine triad nucleotide binding protein 1	1	0	0	0	0	3.35	0	0	0	0	2.46	2.46	2.46	0	3.35	0	0	0	0	0	0	0	0	0	0.004	0	1.41	0	0	1.91	0	1.41	0	0	0.004	0.004	0.004	0	0.004	0	1.41	1.41	1.41	0	1.91	0
GENE105X	79180	79180|EFHD2|EF-hand domain family, member D2	1	0	0	0	0	2.76	0	0	0	0	2.52	3.44	2.52	0	2.52	0	0	0	0	0	0	0	0	0	1.04	0	0	0	0	2.62	0	0	0	0	0.004	0.004	0.004	0	0.004	0	1.44	1.97	1.44	0	1.44	0
GENE47X	1465	1465|CSRP1|cysteine and glycine-rich protein 1	1	0	0	0	0	3.1	0	1.65	1.65	0	2.77	3.1	2.34	0	2.77	1.65	0	0	0	0	0	0	0	0	0.003	0	0.003	0.003	0	1.78	0	0.94	0.94	0	0.003	0.003	0.003	0	0.003	0.003	1.58	1.78	1.33	0	1.58	0.94
GENE75X	6747	6747|SSR3|signal sequence receptor, gamma (translocon-associated protein gamma)	1	0	0	0	0	3.35	0	2.33	2.33	0	2.33	2.33	2.33	0	2.33	2.33	0	0	0	0	0	0	0	0	0.005	0	0.005	0.005	0	1.92	0	1.33	1.33	0	0.005	0.005	0.005	0	0.005	0.005	1.33	1.33	1.33	0	1.33	1.33
GENE98X	51411	51411|BIN2|bridging integrator 2	1	0	0	0	0	1.54	-1.3	1.3	3.11	0	2.84	2.58	2.42	0	2.58	1.39	0	0	0	0	0	0	0	0	0.743	0.743	0.004	0.004	0	1.62	0.004	0.743	1.78	0	0.004	0.399	0.004	0	0.399	0.004	1.62	1.88	1.39	0	1.88	0.793
GENE94X	28988	28988|DBNL|drebrin-like	1	0	0	0	0	1.31	0	2	3.19	0	2.78	2.58	0	0	3.23	0	0	0	0	0	0	0	0	0	1.31	0	0.004	0.004	0	2.06	0	1.14	1.82	0	0.004	0.004	0	0	0.004	0	1.59	1.47	0	0	1.85	0
GENE70X	6201	6201|RPS7|ribosomal protein S7	1	0	0	0	0	2.68	0	1.88	1.88	0	3	3	0	0	3.36	0	0	0	0	0	0	0	0	0	0.004	0	0.004	0.004	0	1.52	0	1.08	1.08	0	0.004	0.004	0	0	0.004	0	1.71	1.71	0	0	1.92	0
GENE30X	7332	7332|UBE2L3|ubiquitin-conjugating enzyme E2L 3	1	0	0	0	0	2.49	0	3.32	2.49	0	2.49	2.35	0	0	2.49	0	0	0	0	0	0	0	0	0	0.003	0	0.003	0.003	0	1.43	0	1.9	1.43	0	0.003	1.03	0	0	0.003	0	1.43	2.36	0	0	1.43	0
GENE95X	30845	30845|EHD3|EH-domain containing 3	1	0	0	0	0	2.67	0	2.77	1.96	0	2.45	2.62	1.75	0	3.15	0	0	0	0	0	0	0	0	0	0.667	0	0.003	0.003	0	2.19	0	1.58	1.12	0	0.317	0.003	0.003	0	0.003	0	1.71	1.5	0.998	0	1.8	0
GENE62X	3611	3611|ILK|integrin-linked kinase	1	0	0	0	0	2.54	0	3.24	1.42	0	2.56	2.13	1.85	0	3.3	0	0	0	0	0	0	0	0	0	0.643	0	0.003	0.003	0	2.09	0	1.85	0.814	0	0.003	0.003	0.003	0	0.003	0	1.46	1.22	1.05	0	1.88	0
GENE24X	5341	5341|PLEK|pleckstrin	1	0	0	0	0	3.08	0	2.84	2.68	0	2.37	1.13	2.28	0	2.77	0	0	0	0	0	0	0	0	0	0.002	0	0.002	0.002	0	1.76	0	1.63	1.53	0	0.4	0.978	0.002	0	0.002	0	1.76	1.63	1.31	0	1.58	0
GENE69X	5908	5908|RAP1B|RAP1B, member of RAS oncogene family	1	0	0	0	0	1.13	0	3.39	2.51	0	1.22	1.48	2.61	0	3.14	0	0	0	0	0	0	0	0	0	1.19	0	0.002	0.002	0	1.84	0	1.94	1.43	0	1.19	1.19	0.002	0	0.002	0	1.89	2.04	1.49	0	1.8	0
GENE82X	7430	7430|EZR|ezrin	1	0	0	0	0	1.56	-0.987	2.93	1.77	-0.43	1.8	1.9	2.74	0	3.3	0	0	0	0	0	0	0	0	0	1.43	1.02	0.247	0.46	0.247	2.31	0.46	1.92	1.47	0.002	0.002	0.002	0.002	0	0.002	0	1.03	1.08	1.57	0	1.88	0
GENE81X	7408	7408|VASP|vasodilator-stimulated phosphoprotein	1	0	0	0	0	0.836	0.761	2.47	2.69	-1.87	2.9	1.71	2.2	0	2.52	0.761	0	0	0	0	0	0	0	0	1.6	0.003	0.003	0.003	1.06	2.08	0.431	1.41	1.54	0.003	0.003	0.431	0.003	0	0.709	0.003	1.65	1.41	1.26	0	2.15	0.431
GENE104X	57142	57142|RTN4|reticulon 4	1	0	0	0	0	0.968	0.378	2.58	2.81	-1.23	2.84	1.3	2.26	-1.16	2.72	2.11	0	0	0	0	0	0	0	0	1.14	0.809	0.003	0.003	0.704	1.7	1.02	1.48	1.61	0.003	0.003	0.661	0.003	0.661	0.003	0.003	1.63	1.41	1.29	0.003	1.55	1.21
GENE83X	7791	7791|ZYX|zyxin	1	0	0	0	0	1.15	-1.94	2.1	3.48	-1.15	2.03	1.72	1.63	0.948	1.8	2.59	0	0	0	0	0	0	0	0	0.831	1.11	0.003	0.003	0.66	1.49	0.003	1.2	1.99	0.003	0.314	0.66	0.66	0.314	0.66	0.003	1.48	1.64	1.59	0.853	1.69	1.48
GENE51X	2243	2243|FGA|fibrinogen alpha chain	1	0	0	0	0	1.36	-1.45	2.96	2.39	-0.779	1.56	1.89	2.52	1.95	2.29	2.25	0	0	0	0	0	0	0	0	1.11	0.921	0.002	0.091	0.445	1.89	0.091	1.69	1.46	0.002	0.609	0.89	0.445	0.002	0.537	0.313	1.51	1.97	1.89	1.11	1.85	1.6
GENE52X	2244	2244|FGB|fibrinogen beta chain	1	0	0	0	0	1.89	-1.28	2.91	2.45	0	1.81	3.5	1.03	1.41	1.49	2.29	0	0	0	0	0	0	0	0	1.21	0.733	0.002	0.002	0	2.28	0.002	1.66	1.4	0	0.274	0.002	0.809	0.002	0.491	0.002	1.31	2	1.4	0.809	1.34	1.31
GENE115X	100653243	100653243|LOC100653243|uncharacterized LOC100653243	1	0	0	0	0	2.39	-0.828	2.73	1.05	1.73	1.86	3.32	2.91	1.91	1.43	2.22	0	0	0	0	0	0	0	0	0.275	0.473	0.002	0.002	0.002	1.64	0.002	1.56	0.599	0	0.002	0.002	0.002	0.002	0.002	0.002	1.06	1.9	1.67	1.09	0.816	1.27
GENE109X	642131	642131|LOC642131|uncharacterized LOC642131	1	0	0	0	0	2.39	-0.826	2.73	1.05	1.73	1.85	3.32	2.94	1.91	1.43	2.22	0	0	0	0	0	0	0	0	0.275	0.472	0.002	0.002	0.002	1.64	0.002	1.56	0.598	0	0.002	0.002	0.002	0.002	0.002	0.002	1.06	1.9	1.68	1.09	0.815	1.26
GENE113X	100423062	100423062|IGLL5|immunoglobulin lambda-like polypeptide 5	1	0	0	0	0	2.76	-1.69	3.14	1.41	1.61	0.957	1.44	3.32	1.98	1.31	2.01	0	0	0	0	0	0	0	0	0.001	0.967	0.001	0.001	0.001	1.58	0.001	1.79	0.808	0.924	0.655	1.06	0.001	0.001	0.438	0.001	1.2	1.88	1.9	1.13	1.19	1.15
GENE110X	651536	651536|LOC651536|immunoglobulin iota chain-like	1	0	0	0	0	3.05	-1.71	2.52	1.12	0	1.41	1.81	3.48	1.47	1.99	1.25	0	0	0	0	0	0	0	0	0.002	0.98	0.002	0.002	0	1.74	0.002	1.44	0.645	0	0.612	1.01	0.002	0.002	0.002	0.564	1.42	2.05	1.99	0.837	1.14	1.28
GENE39X	2	2|A2M|alpha-2-macroglobulin	1	0	0	0	0	1.15	0	3.36	0	0	1.35	2.17	3.52	1.09	1.14	2.51	0	0	0	0	0	0	0	0	1.39	0.003	0.208	0.208	0	2.04	0.003	2.13	0.208	0	0.701	1.32	0.003	0.003	0.56	0.003	1.47	2.55	2.01	0.623	1.21	1.43
GENE42X	345	345|APOC3|apolipoprotein C-III	1	0	0	0	0	1.03	0	3.95	0	0	1.77	1.82	3.14	1.77	1.77	1.77	0	0	0	0	0	0	0	0	1.01	0	0.003	0	0	1.6	0	2.26	0	0	0.003	1.36	0.003	0.003	0.003	0.003	1.01	2.4	1.79	1.01	1.01	1.01
GENE44X	720	720|C4A|complement component 4A (Rodgers blood group)	1	0	-1.06	0	1.47	2.37	0	3.56	0.15	0	1.54	2.51	3.03	1.24	1.56	2.03	0.607	0.607	0	0.002	0.607	0.002	0	0.839	0.607	0.002	0.002	0.002	0	1.96	0.002	2.03	0.084	0	0.084	0.898	0.002	0.002	0.002	0.002	0.964	2.34	1.73	0.706	0.893	1.16
GENE45X	721	721|C4B|complement component 4B (Chido blood group)	1	0	0	0	0	3.21	0	3.39	0.144	0	1.47	2.41	2.9	1.19	1.5	1.95	0	0	0	0	0	0	0	0	0.002	0.002	0.002	0.002	0	1.83	0.002	1.93	0.081	0	0.081	0.861	0.002	0.002	0.002	0.002	0.924	2.24	1.66	0.677	0.857	1.11
GENE46X	727	727|C5|complement component 5	1	0	0	0	0	3.29	0	3.06	0.165	0	1.52	2.22	3.21	1.3	1.44	2.1	0	0	0	0	0	0	0	0	0.002	0.002	0.002	0.002	0	1.88	0.002	1.75	0.093	0	0.093	0.928	0.002	0.002	0.002	0.002	0.958	2.2	1.83	0.743	0.822	1.2
GENE112X	100293534	100293534|LOC100293534|complement C4-B-like	1	0	0	0	0	3.2	0	2.98	0.159	0	1.63	2.26	3.2	1.25	1.65	2.15	0	0	0	0	0	0	0	0	0.002	0.002	0.002	0.002	0	1.83	0.002	1.7	0.089	0	0.089	0.949	0.002	0.002	0.002	0.002	1.02	2.24	1.83	0.715	0.944	1.23
GENE43X	718	718|C3|complement component 3	1	0	0	0	0	2.67	0	2.8	0.179	0	1.62	2.39	3.46	1.41	1.56	2.28	0	0	0	0	0	0	0	0	0.522	0.002	0.306	0.002	0	2.04	0.002	1.9	0.101	0	0.101	1.01	0.002	0.002	0.002	0.002	1.03	2.37	1.97	0.807	0.894	1.31
GENE60X	3240	3240|HP|haptoglobin	1	0	0	0	0	1.47	0	2.67	0	0	1.71	3.39	3.31	1.94	2.1	2.23	0	0	0	0	0	0	0	0	0.571	0	0.003	0	0	1.41	0	1.52	0	0	0.424	0.003	0.003	0.003	0.003	0.003	1.41	1.93	1.89	1.11	1.2	1.27
GENE20X	3250	3250|HPR|haptoglobin-related protein	1	0	0	0	0	2.38	0	2.58	0	0	1.65	3.28	3.2	1.88	2.03	2.15	0	0	0	0	0	0	0	0	0.002	0	0.002	0	0	1.36	0	1.48	0	0	0.41	0.002	0.002	0.002	0.002	0.002	1.36	1.87	1.83	1.07	1.16	1.23
GENE66X	5004	5004|ORM1|orosomucoid 1	1	0	0	0	0	3.07	0	2.47	0	0	1.83	3.24	2.9	0	2.19	1.83	0	0	0	0	0	0	0	0	0.003	0	0.003	0	0	1.75	0	1.41	0	0	0.003	0.003	0.003	0	0.003	0.003	1.04	1.85	1.65	0	1.25	1.04
GENE16X	348	348|APOE|apolipoprotein E	1	2.23	-0.995	0.995	0.492	3.3	0	3.54	0	0	1.18	2.31	2.2	0	1.8	1.59	0.002	0.569	0.002	0.569	1.27	0.002	0.569	0.85	0.002	0	0.002	0	0	1.89	0	2.02	0	0	0.874	0.907	0.445	0	0.002	0.002	1.55	2.22	1.71	0	1.03	0.907
GENE67X	5265	5265|SERPINA1|serpin peptidase inhibitor, clade A (alpha-1 antiproteinase, antitrypsin), member 1	1	1.15	0	0.583	1.06	2.79	0	3.22	1.03	0	1.94	2.18	3.35	0	1.97	0.583	0.746	0	0.002	0.002	1.4	0	0.331	0.608	0.844	0	0.331	0.002	0	2.44	0	2.17	0.589	0	0.589	1.33	0.331	0	0.331	0.002	1.7	2.58	2.25	0	1.46	0.331
GENE80X	7276	7276|TTR|transthyretin	1	2.04	0	0	0	1.34	0	3.93	1.49	0	2.04	2.6	2.41	0	1.49	0	0.003	0	0	0	1.17	0	0	0	1.38	0	0.003	0.003	0	2.15	0	2.25	0.851	0	0.003	0.851	0.003	0	0.003	0	1.17	2.34	1.38	0	0.851	0
GENE34X	10890	10890|RAB10|RAB10, member RAS oncogene family	1	0	0	0	0	3.26	0	3.09	0	0	2.48	3.09	2.26	0	0.456	0	0	0	0	0	0	0	0	0	0.003	0	0.003	0	0	1.86	0	1.77	0	0	0.003	0.003	0.003	0	1.29	0	1.42	1.77	1.29	0	1.55	0
GENE25X	5870	5870|RAB6A|RAB6A, member RAS oncogene family	1	0	0	0	0	3.02	0	3.19	0	0	2.85	2.85	2.16	0	-0.228	0	0	0	0	0	0	0	0	0	0.003	0	0.003	0	0	1.73	0	1.82	0	0	0.003	0.003	0.003	0	1.52	0	1.63	1.63	1.23	0	1.39	0
GENE103X	55845	55845|BRK1|BRICK1, SCAR/WAVE actin-nucleating complex subunit	1	0	0	0	0	2.54	0	2.54	0	0	2.54	3.95	2.54	0	0	0	0	0	0	0	0	0	0	0	0.004	0	0.004	0	0	1.45	0	1.45	0	0	0.004	0.004	0.004	0	0	0	1.45	2.26	1.45	0	0	0
GENE41X	344	344|APOC2|apolipoprotein C-II	1	0	0	0	0	2.85	0	2.85	0	0	2.12	2.93	2.85	0	0	0	0	0	0	0	0	0	0	0	0.003	0	0.003	0	0	1.63	0	1.63	0	0	0.003	1.21	0.003	0	0	0	1.21	2.88	1.63	0	0	0
GENE21X	3700	3700|ITIH4|inter-alpha-trypsin inhibitor heavy chain family, member 4	1	0	0	0	0	2.92	0	2.95	0	0	1.12	3.63	3.13	0.193	0.193	0.929	0	0	0	0	0	0	0	0	0.003	0	0.003	0	0	1.67	0	1.69	0	0	0.003	0.108	0.003	0.003	0.003	0.003	0.641	2.18	1.79	0.108	0.108	0.531
GENE19X	1356	1356|CP|ceruloplasmin (ferroxidase)	1	0	0	0	0	2.84	0	2.92	0	0	1.68	3.83	2.9	0.748	0.748	1.14	0	0	0	0	0	0	0	0	0.003	0	0.003	0	0	1.62	0	1.67	0	0	0.003	0.003	0.003	0.003	0.003	0.003	0.956	2.19	1.65	0.424	0.424	0.651
GENE15X	325	325|APCS|amyloid P component, serum	1	0	0	0	0	2.96	0	2.96	0	0	1.26	3.77	2.76	0	1.26	0	0	0	0	0	0	0	0	0	0.003	0	0.003	0	0	1.69	0	1.69	0	0	0.003	0.003	0.003	0	0.003	0	0.72	2.15	1.57	0	0.72	0
GENE35X	81876	81876|RAB1B|RAB1B, member RAS oncogene family	1	0	0	0	0	3.29	0	3.13	0	0	0.844	3.34	2.55	0	0.705	0	0	0	0	0	0	0	0	0	0.002	0	0.002	0	0	1.87	0	1.79	0	0	0.977	0.002	0.002	0	1.22	0	1.46	1.91	1.46	0	1.62	0
GENE99X	51552	51552|RAB14|RAB14, member RAS oncogene family	1	0	0	0	0	1.68	0	3.36	0	0	0.62	3.65	2.16	0	2.66	0	0	0	0	0	0	0	0	0	1.04	0	0.003	0	0	2	0	1.92	0	0	1.04	0.003	0.003	0	0.003	0	1.39	2.08	1.24	0	1.52	0
GENE79X	7178	7178|TPT1|tumor protein, translationally-controlled 1	1	0	0	0	0	1.73	0	1.73	0	0	4.06	2.79	1.98	0	1.98	0	0	0	0	0	0	0	0	0	1.13	0	1.13	0	0	2.12	0	2.12	0	0	0.004	0.004	0.004	0	0.004	0	2.32	1.59	1.13	0	1.13	0
GENE85X	8676	8676|STX11|syntaxin 11	1	0	0	0	0	2.21	0	2.4	0	0	2.99	3.63	1.23	0	2.75	0	0	0	0	0	0	0	0	0	0.704	0	0.004	0	0	1.96	0	1.38	0	0	0.004	0.004	0.004	0	0.004	0	1.71	2.07	0.704	0	1.57	0
GENE50X	1984	1984|EIF5A|eukaryotic translation initiation factor 5A	1	0	0	0	0	1.99	0	1.99	0	0	2.19	4.03	2.19	0	3.04	0	0	0	0	0	0	0	0	0	0.004	0	0.004	0	0	1.13	0	1.13	0	0	0.004	0.004	0.004	0	0.004	0	1.25	2.31	1.25	0	1.74	0
GENE111X	654364	654364|NME1-NME2|NME1-NME2 readthrough	1	0	0	0	0	3.07	0	2.54	0	0	1.56	2.98	1.6	0	3.48	0	0	0	0	0	0	0	0	0	0.002	0	0.002	0	0	1.75	0	1.45	0	0	0.893	0.002	0.002	0	0.002	0	1.78	1.7	0.911	0	1.99	0
GENE101X	54205	54205|CYCS|cytochrome c, somatic	1	-1.54	0	0	0	2.75	0	2.09	0	0	2.38	2.66	2.66	0	2.91	0	0.884	0	0	0	0.002	0	0	0	0.002	0	0.002	0	0	1.57	0	1.19	0	0	0.002	0.002	0.002	0	0.002	0	1.36	1.52	1.52	0	1.66	0
GENE49X	1603	1603|DAD1|defender against cell death 1	1	0	0	0	0	2.4	0	3.23	0	0	2.4	3.23	2.4	0	2.4	0	0	0	0	0	0	0	0	0	0.004	0	0.004	0	0	1.37	0	1.84	0	0	0.004	0.004	0.004	0	0.004	0	1.37	1.84	1.37	0	1.37	0
GENE92X	22919	22919|MAPRE1|microtubule-associated protein, RP/EB family, member 1	1	0	0	0	0	2.31	0	2.8	0	0	3.17	3.17	2.31	0	2.31	0	0	0	0	0	0	0	0	0	0.004	0	0.004	0	0	1.32	0	1.6	0	0	0.004	0.004	0.004	0	0.004	0	1.81	1.81	1.32	0	1.32	0
GENE96X	51015	51015|ISOC1|isochorismatase domain containing 1	1	0	0	0	0	2.94	0	2.62	0	0	2.62	3.46	2.62	0	1.51	0	0	0	0	0	0	0	0	0	0.003	0	0.003	0	0	1.68	0	1.49	0	0	0.003	0.003	0.003	0	0.003	0	1.49	1.97	1.49	0	0.861	0
GENE97X	51170	51170|HSD17B11|hydroxysteroid (17-beta) dehydrogenase 11	1	0	0	0	0	3.36	0	2.5	0	0	2.84	2.53	2.48	0	2.04	0	0	0	0	0	0	0	0	0	0.004	0	0.004	0	0	1.92	0	1.44	0	0	0.004	0.727	0.004	0	0.004	0	1.62	2.17	1.42	0	1.16	0
GENE48X	1509	1509|CTSD|cathepsin D	1	0	0	0	0	3.35	0	2.38	0	0	3.09	2.06	2.53	0	1.99	0	0	0	0	0	0	0	0	0	0.004	0	0.004	0	0	1.91	0	1.36	0	0	0.004	1.14	0.004	0	0.004	0	1.76	2.31	1.44	0	1.14	0
GENE28X	6251	6251|RSU1|Ras suppressor protein 1	1	0	0	0	0	2.84	0	2.96	0	0	2.87	1.87	2.68	0	2.68	0	0	0	0	0	0	0	0	0	0.002	0	0.002	0	0	1.62	0	1.68	0	0	0.002	0.751	0.002	0	0.002	0	1.64	1.82	1.53	0	1.53	0
GENE40X	308	308|ANXA5|annexin A5	1	0	0	0	0	1.64	0	2.54	0.88	0	2.31	2.58	1.97	0	1.99	0	0	0	0	0	0	0	0	0	1.25	0	0.832	0.003	0	2.19	0	2.28	0.503	0	1.17	1.32	0.975	0	1.25	0	2.48	2.79	2.1	0	2.39	0
GENE87X	10094	10094|ARPC3|actin related protein 2/3 complex, subunit 3, 21kDa	1	0	0	0	0	0.616	0	3.54	0	0	1.55	2.09	2.77	0	1.79	0	0	0	0	0	0	0	0	0	1.58	0	0.003	0	0	1.93	0	2.03	0	0	1.45	1.08	0.003	0	1.29	0	2.33	2.27	1.58	0	2.31	0
GENE88X	10109	10109|ARPC2|actin related protein 2/3 complex, subunit 2, 34kDa	1	0	0	0	0	1.15	0	3	1.08	0	2.16	1.63	3.13	0	1.7	0	0	0	0	0	0	0	0	0	1.6	0	0.003	0.003	0	2.25	0	1.71	0.615	0	1.35	1.48	0.003	0	1.19	0	2.59	2.41	1.79	0	2.16	0
GENE78X	7170	7170|TPM3|tropomyosin 3	1	0	0	0	0	0.572	-1.09	3.13	1.09	-0.714	1.98	1.14	3.46	0	1.29	0	0	0	0	0	0	0	0	0	1.74	0.621	0.002	0.002	0.408	2.06	0.002	1.78	0.621	0.002	0.93	1.36	0.002	0	1.22	0	2.06	2.01	1.98	0	1.96	0
GENE71X	6275	6275|S100A4|S100 calcium binding protein A4	1	0	0	0	0	0.758	-1.41	3.35	0	0	1.21	1.02	3.35	0	0.915	1.41	0	0	0	0	0	0	0	0	1.69	0.81	0.002	0	0	2.12	0.002	1.91	0	0	1.43	1.43	0.002	0	1.28	0.002	2.12	2.02	1.91	0	1.8	0.81
GENE63X	4218	4218|RAB8A|RAB8A, member RAS oncogene family	1	0	0	0	0	1.11	0	3.52	0	0	3.39	1.37	2.66	0	1.37	0	0	0	0	0	0	0	0	0	1.16	0	0.003	0	0	1.79	0	2.02	0	0	0.003	1.3	0.003	0	1.16	0	1.94	2.08	1.53	0	1.94	0
GENE64X	4830	4830|NME1|NME/NM23 nucleoside diphosphate kinase 1	1	0	0	0	0	0.903	0	2.81	0	0	3.45	2.4	2.93	0	1.93	1.36	0	0	0	0	0	0	0	0	1.28	0	0.003	0	0	1.8	0	1.6	0	0	0.003	0.78	0.003	0	0.78	0.003	1.97	2.15	1.67	0	1.88	0.78
GENE76X	6902	6902|TBCA|tubulin folding cofactor A	1	0	0	0	0	0	0	2.89	0	0	2.89	2.89	2.89	0	2.89	0	0	0	0	0	0	0	0	0	0	0	0.005	0	0	0	0	1.66	0	0	0.005	0.005	0.005	0	0.005	0	1.66	1.66	1.66	0	1.66	0
GENE93X	23589	23589|CARHSP1|calcium regulated heat stable protein 1, 24kDa	1	0	0	0	0	0	0	2.89	0	0	2.89	2.89	2.89	0	2.89	0	0	0	0	0	0	0	0	0	0	0	0.005	0	0	0	0	1.65	0	0	0.005	0.005	0.005	0	0.005	0	1.65	1.65	1.65	0	1.65	0
GENE74X	6352	6352|CCL5|chemokine (C-C motif) ligand 5	1	0	0	0	0	0	0	2.75	0	0	3.22	2.53	2.04	0	3.6	0	0	0	0	0	0	0	0	0	0	0	0.003	0	0	0	0	1.57	0	0	0.003	0.003	0.003	0	0.003	0	1.84	1.45	1.17	0	2.06	0
GENE54X	2791	2791|GNG11|guanine nucleotide binding protein (G protein), gamma 11	1	0	0	0	0	0	0	3.15	0	0	3.15	3.15	0	0	3.15	0	0	0	0	0	0	0	0	0	0	0	0.003	0	0	0	0	1.8	0	0	0.003	0.003	0	0	0.003	0	1.8	1.8	0	0	1.8	0
GENE91X	11230	11230|PRAF2|PRA1 domain family, member 2	1	0	0	0	0	2.45	0	3.48	0	0	2.57	2.51	0	0	2.57	2.51	0	0	0	0	0	0	0	0	0.005	0	0.005	0	0	1.4	0	1.98	0	0	0.005	0.005	0	0	0.005	0.005	1.47	1.43	0	0	1.47	1.43
GENE18X	1345	1345|COX6C|cytochrome c oxidase subunit VIc	1	0	0	0	0	3.64	0	3.64	0	0	0	2.54	0	0	2.54	0	0	0	0	0	0	0	0	0	0.004	0	0.004	0	0	2.08	0	2.08	0	0	0	0.004	0	0	0.004	0	0	1.46	0	0	1.46	0
GENE100X	51762	51762|RAB8B|RAB8B, member RAS oncogene family	1	0	0	0	0	2.84	0	3.33	0	0	0	3.3	0	0	3.11	0	0	0	0	0	0	0	0	0	0.003	0	0.003	0	0	1.63	0	1.91	0	0	0	0.003	0	0	0.003	0	0	1.89	0	0	1.78	0
GENE27X	5899	5899|RALB|v-ral simian leukemia viral oncogene homolog B (ras related; GTP binding protein)	1	0	0	0	0	3.12	0	3.12	0	0	2.5	2.93	0	0	2.74	0	0	0	0	0	0	0	0	0	0.003	0	0.003	0	0	1.78	0	1.78	0	0	0.003	0.003	0	0	0.003	0	1.43	1.68	0	0	1.56	0
GENE29X	7169	7169|TPM2|tropomyosin 2 (beta)	1	0	0	0	0	3.31	0	2.95	0	0	3.17	0	0	0	3.17	0	0	0	0	0	0	0	0	0	0.002	0	0.002	0	0	1.89	0	1.69	0	0	0.002	0	0	0	0.002	0	1.81	0	0	0	1.81	0
GENE23X	4831	4831|NME2|NME/NM23 nucleoside diphosphate kinase 2	1	0	0	0	0	3.12	0	2.9	0	0	1.78	0	0	0	3.97	0	0	0	0	0	0	0	0	0	0.002	0	0.002	0	0	1.79	0	1.66	0	0	1.02	0	0	0	0.002	0	2.03	0	0	0	2.27	0
GENE26X	5879	5879|RAC1|ras-related C3 botulinum toxin substrate 1 (rho family, small GTP binding protein Rac1)	1	0	0	0	0	3.37	0	3.7	0	0	1.24	0	1.45	0	3.15	0	0	0	0	0	0	0	0	0	0.003	0	0.003	0	0	1.92	0	2.11	0	0	1.21	0.827	0.003	0	0.003	0	1.92	0.827	0.827	0	1.79	0
GENE17X	1191	1191|CLU|clusterin	1	0	0	0	0	3.93	0	3.86	0	0	0	1.1	2.46	0	0.794	0	0	0	0	0	0	0	0	0	0.004	0	0.004	0	0	2.25	0	2.21	0	0	0.46	1.09	0.004	0	0.004	0	0.46	1.72	1.4	0	0.46	0
GENE38X	341208	341208|HEPHL1|hephaestin-like 1	1	0	0	0	0	4.19	0	4.31	0	0	0	0	0	0	0	0	0	0	0	0	0	0	0	0	0.004	0	0.004	0	0	2.39	0	2.47	0	0	0	0	0	0	0	0	0	0	0	0	0	0
GENE33X	9843	9843|HEPH|hephaestin	1	0	0	0	0	4.19	0	4.31	0	0	0	0	0	0	0	0	0	0	0	0	0	0	0	0	0.004	0	0.004	0	0	2.39	0	2.47	0	0	0	0	0	0	0	0	0	0	0	0	0	0
GENE14X	70	70|ACTC1|actin, alpha, cardiac muscle 1	1	0	0	0	0	3.42	0	3.62	0	0	0.897	0.419	0.532	0	0.759	0	0	0	0	0	0	0	0	0	0.002	0	0.002	0	0	1.96	0	2.07	0	0	1.75	1.62	1.6	0	1.58	0	2.26	1.86	1.91	0	2.01	0
GENE37X	136319	136319|MTPN|myotrophin	1	0	0	0	0	3.11	0	3.11	0	0	0.369	1.15	0	0	-0.461	-1.95	0	0	0	0	0	0	0	0	0.003	0	0.003	0	0	1.78	0	1.78	0	0	1.78	1.52	1.52	0	1.78	1.12	1.99	2.17	1.52	0	1.52	0.003
GENE22X	4697	4697|NDUFA4|NADH dehydrogenase (ubiquinone) 1 alpha subcomplex, 4, 9kDa	1	0	0	0	0	2.83	0	2.83	0	0	-2.12	2.83	-2.12	0	0	0	0	0	0	0	0	0	0	0	0.003	0	0.003	0	0	1.61	0	1.61	0	0	1.2	0.003	1.2	0	1.61	0	0.003	1.61	0.003	0	1.61	0
GENE32X	9230	9230|RAB11B|RAB11B, member RAS oncogene family	1	0	0	0	0	3.12	0	3.02	0	0	-2.48	0.601	0	0	-2.6	0	0	0	0	0	0	0	0	0	0.002	0	0.002	0	0	1.78	0	1.73	0	0	1.42	1.27	0	0	1.49	0	0.002	1.61	0	0	0.002	0
GENE31X	8349	8349|HIST2H2BE|histone cluster 2, H2be	1	0	0	0	0	3.56	1.99	3.31	3.43	0	0	0	0	0	0	0	0	0	0	0	0	0	0	0	0.002	0.002	0.002	0.002	0	2.04	1.14	1.9	1.96	0	0	0	0	0	0	0	0	0	0	0	0	0
GENE58X	3018	3018|HIST1H2BB|histone cluster 1, H2bb	1	0	0	0	0	0	2.04	0	3.5	0	3.88	1.15	1.02	2.4	0	0.801	0	0	0	0	0	0	0	0	0	0.002	0	0.002	0	0	1.16	0	2	0	0.002	0.883	1.04	0.002	0	1.16	2.22	1.54	1.62	1.37	0	1.62
GENE108X	317772	317772|HIST2H2AB|histone cluster 2, H2ab	1	0	0	0	0	0	0	0	2.99	0	0	3.66	0	0	3.94	0	0	0	0	0	0	0	0	0	0	0	0	0.003	0	0	0	0	1.71	0	0	0.003	0	0	0.003	0	0	2.09	0	0	2.25	0
GENE107X	85236	85236|HIST1H2BK|histone cluster 1, H2bk	1	0	0	0	0	-3.2	0	0	3.43	0	1.46	0	0	0	2.18	2	0	0	0	0	0	0	0	0	1.83	0	0	0.002	0	0.002	0	0	1.96	0	1.34	0	0	0	0.002	0.002	2.17	0	0	0	1.24	1.14
GENE57X	3015	3015|H2AFZ|H2A histone family, member Z	1	0	0	0	0	-3.1	0	0	0	0	3.25	0	0	0	3.25	2.25	0	0	0	0	0	0	0	0	1.77	0	0	0	0	0.003	0	0	0	0	0.003	0	0	0	0.003	0.003	1.86	0	0	0	1.86	1.29
GENE86X	8766	8766|RAB11A|RAB11A, member RAS oncogene family	1	0	0	1.67	0	-2.66	0	0	0	0	3.11	0	1.24	0	3.62	1.16	0	0	0.003	0	0	0	0.959	0	1.52	0	0	0	0	0.003	0	0	0	0	0.003	0	1.14	0	0.003	0.003	1.78	0	1.85	0	2.07	0.662
GENE13X	101060412	101060412|LOC101060412|nuclear pore complex-interacting protein-like	1	0	0	4.25	4.25	0	0	0	0	0	0	0	0	0	0	0	0	0	0.005	0.005	0	0	2.43	2.43	0	0	0	0	0	0	0	0	0	0	0	0	0	0	0	0	0	0	0	0	0	0
GENE11X	101059953	101059953|LOC101059953|nuclear pore complex-interacting protein-like	1	0	0	4.25	4.25	0	0	0	0	0	0	0	0	0	0	0	0	0	0.005	0.005	0	0	2.43	2.43	0	0	0	0	0	0	0	0	0	0	0	0	0	0	0	0	0	0	0	0	0	0
GENE8X	100288332	100288332|LOC100288332|NPIP-like protein 1-like	1	0	0	4.25	4.25	0	0	0	0	0	0	0	0	0	0	0	0	0	0.005	0.005	0	0	2.43	2.43	0	0	0	0	0	0	0	0	0	0	0	0	0	0	0	0	0	0	0	0	0	0
GENE4X	9284	9284|NPIP|nuclear pore complex interacting protein	1	0	0	4.25	4.25	0	0	0	0	0	0	0	0	0	0	0	0	0	0.005	0.005	0	0	2.43	2.43	0	0	0	0	0	0	0	0	0	0	0	0	0	0	0	0	0	0	0	0	0	0
GENE10X	101059938	101059938|LOC101059938|nuclear pore complex-interacting protein-like	1	0	0	4.25	4.25	0	0	0	0	0	0	0	0	0	0	0	0	0	0.005	0.005	0	0	2.43	2.43	0	0	0	0	0	0	0	0	0	0	0	0	0	0	0	0	0	0	0	0	0	0
GENE12X	101060393	101060393|LOC101060393|nuclear pore complex-interacting protein-like 1-like	1	0	0	4.25	4.25	0	0	0	0	0	0	0	0	0	0	0	0	0	0.005	0.005	0	0	2.43	2.43	0	0	0	0	0	0	0	0	0	0	0	0	0	0	0	0	0	0	0	0	0	0
GENE2X	3133	3133|HLA-E|major histocompatibility complex, class I, E	1	4.14	3.16	0	3.16	0	0	0	1.34	0	0	0	0	0	0	0	0.005	0.005	0	0.005	2.36	1.81	0	1.81	0	0	0	0.005	0	0	0	0	0.762	0	0	0	0	0	0	0	0	0	0	0	0	0
GENE9X	100509457	100509457|LOC100509457|HLA class II histocompatibility antigen, DQ alpha 1 chain-like	1	5.89	0	0	0	0	0	0	0	0	0	0	0	0	0	0	0.006	0	0	0	3.36	0	0	0	0	0	0	0	0	0	0	0	0	0	0	0	0	0	0	0	0	0	0	0	0	0
GENE1X	3107	3107|HLA-C|major histocompatibility complex, class I, C	1	3.26	4.06	0.721	-0.721	-2.18	0	0	0	0	0	0	0	0	0	0	0.004	0.004	0.99	1.4	1.86	2.33	1.4	0.99	1.25	0	0	0	0	0.004	0	0	0	0	0	0	0	0	0	0	0	0	0	0	0	0
GENE5X	29969	29969|MDFIC|MyoD family inhibitor domain containing	1	3.06	4.36	3.06	0	0	0	0	0	0	0	0	0	0	0	0	0.006	0.006	0.006	0	1.75	2.48	1.75	0	0	0	0	0	0	0	0	0	0	0	0	0	0	0	0	0	0	0	0	0	0	0
GENE3X	5303	5303|PIN4|protein (peptidylprolyl cis/trans isomerase) NIMA-interacting, 4 (parvulin)	1	0	5.88	0	0	0	0	0	0	0	0	0	0	0	0	0	0	0.005	0	0	0	3.37	0	0	0	0	0	0	0	0	0	0	0	0	0	0	0	0	0	0	0	0	0	0	0	0
