# Supplementary material for: Proteomic Analysis of Non-human Primate Peripheral Blood Mononuclear Cells During Burkholderia mallei Infection Reveals a Role of Ezrin in Glanders Pathogenesis
Source: Front Microbiol. 2021 Apr 22;12:625211. doi: 10.3389/fmicb.2021.625211 (PMC8101288; doi:10.3389/fmicb.2021.625211)
Supplement: Supplementary Table 5 — The underlying data of the Circo plot and share GO terms for Figure 2C. [file Table_5.XLSX]

## Sheet: Annotation
Gene	original_id	AGM	CM	RM	Gene ID	Type	Tax ID	Homologene Gene ID	Homologene Gene Tax ID	Gene Symbol	Description	Biological Process (GO)	Kinase Class (UniProt)	Protein Function (Protein Atlas)	Subcellular Location (Protein Atlas)	Drug (DrugBank)	Canonical Pathways	Hallmark Gene Sets	GO:0045055 regulated exocytosis	hsa05322 Systemic lupus erythematosus	GO:0002526 acute inflammatory response	R-HSA-76002 Platelet activation, signaling	R-HSA-8873719 RAB geranylgeranylation	GO:0097435 supramolecular fiber organizat	GO:0060627 regulation of vesicle-mediated	GO:0090066 regulation of anatomical struc	GO:0006898 receptor-mediated endocytosis	GO:0006953 acute-phase response	GO:0019730 antimicrobial humoral response	GO:0009306 protein secretion	R-HSA-8963898 Plasma lipoprotein assembly	GO:0006826 iron ion transport	GO:0097242 amyloid-beta clearance	GO:0120031 plasma membrane bounded cell p	R-HSA-418594 G alpha (i) signalling events	GO:0006909 phagocytosis	R-HSA-390522 Striated Muscle Contraction	R-HSA-446353 Cell-extracellular matrix inte	TotalEvidenceCount
7169	7169	0	1	1	7169	Gene_ID	H. sapiens	7169	H. sapiens	TPM2	tropomyosin 2	GO:0030049 muscle filament sliding;GO:0033275 actin-myosin filament sliding;GO:0070252 actin-mediated cell contraction						(M5909)HALLMARK MYOGENESIS; (M5930)HALLMARK EPITHELIAL MESENCHYMAL TRANSITION	0	0	0	0	0	1	0	0	0	0	0	0	0	0	0	0	0	0	1	0	2
7332	7332	0	1	1	7332	Gene_ID	H. sapiens	7332	H. sapiens	UBE2L3	ubiquitin conjugating enzyme E2 L3	GO:1903955 positive regulation of protein targeting to mitochondrion;GO:1903214 regulation of protein targeting to mitochondrion;GO:1903749 positive regulation of establishment of protein localization to mitochondrion		Enzymes/ENZYME proteins/Transferases	Cytosol;Nucleus(Approved)		(M258)PID BARD1 PATHWAY; (M275)PID ALPHA SYNUCLEIN PATHWAY	(M5926)HALLMARK MYC TARGETS V1	0	1	0	0	0	1	0	0	0	0	0	1	0	0	0	0	0	0	0	0	2
3250	3250	0	1	1	3250	Gene_ID	H. sapiens	3250	H. sapiens	HPR	haptoglobin-related protein	GO:0002526 acute inflammatory response;GO:0006898 receptor-mediated endocytosis;GO:0010942 positive regulation of cell death		Enzymes/Peptidases/Serine-type peptidases	Vesicles(Approved)				0	0	1	0	1	0	0	0	1	0	0	0	0	0	0	0	0	0	0	0	2
5341	5341	0	1	1	5341	Gene_ID	H. sapiens	5341	H. sapiens	PLEK	pleckstrin	GO:0010920 negative regulation of inositol phosphate biosynthetic process;GO:0010925 positive regulation of inositol-polyphosphate 5-phosphatase activity;GO:0070560 protein secretion by platelet			Nucleoli(Approved)			(M5946)HALLMARK COAGULATION; (M5921)HALLMARK COMPLEMENT; (M5890)HALLMARK TNFA SIGNALING VIA NFKB	1	0	0	1	1	1	0	1	0	0	0	1	1	0	0	0	0	0	0	1	2
348	348	0	1	1	348	Gene_ID	H. sapiens	348	H. sapiens	APOE	apolipoprotein E	GO:1903002 positive regulation of lipid transport across blood brain barrier;GO:1902995 positive regulation of phospholipid efflux;GO:1905890 regulation of cellular response to very-low-density lipoprotein particle stimulus			Vesicles(Approved)	Human Serum Albumin (Very-low-density lipoprotein particle receptor binding);Serum albumin iodonated (Very-low-density lipoprotein particle receptor binding)		(M5905)HALLMARK ADIPOGENESIS; (M5934)HALLMARK XENOBIOTIC METABOLISM	0	1	1	1	1	1	1	1	1	0	0	1	1	1	1	1	1	0	0	0	2
92815	92815	0	1	1	92815	Gene_ID	H. sapiens	92815	H. sapiens	H2AW	H2A.W histone	GO:0070914 UV-damage excision repair;GO:0006337 nucleosome disassembly;GO:0031498 chromatin disassembly						(M5939)HALLMARK P53 PATHWAY	0	1	0	0	0	0	0	0	0	0	0	0	0	0	0	0	0	0	0	0	2
10890	10890	0	1	1	10890	Gene_ID	H. sapiens	10890	H. sapiens	RAB10	RAB10, member RAS oncogene family	GO:0045200 establishment of neuroblast polarity;GO:0045196 establishment or maintenance of neuroblast polarity;GO:0097051 establishment of protein localization to endoplasmic reticulum membrane							1	0	0	0	1	0	1	1	0	0	0	1	0	0	0	0	0	0	0	0	2
5899	5899	0	1	1	5899	Gene_ID	H. sapiens	5899	H. sapiens	RALB	RAS like proto-oncogene B	GO:0001928 regulation of exocyst assembly;GO:0001927 exocyst assembly;GO:0060178 regulation of exocyst localization		RAS pathway related proteins			(M76)PID P38 ALPHA BETA PATHWAY; (M136)PID FOXO PATHWAY; (M124)PID CXCR4 PATHWAY	(M5923)HALLMARK PI3K AKT MTOR SIGNALING	0	0	0	0	1	1	1	0	0	0	0	1	0	0	1	1	0	0	0	0	2
6251	6251	0	1	1	6251	Gene_ID	H. sapiens	6251	H. sapiens	RSU1	Ras suppressor protein 1	GO:0010811 positive regulation of cell-substrate adhesion;GO:0010810 regulation of cell-substrate adhesion;GO:0043547 positive regulation of GTPase activity			Vesicles(Approved)			(M5915)HALLMARK APICAL JUNCTION	0	0	0	1	0	0	0	0	0	0	0	0	0	0	0	0	0	0	0	1	2
8335	8335	0	0	1	8335	Gene_ID	H. sapiens	8335	H. sapiens	H2AC4	H2A clustered histone 4	GO:0006342 chromatin silencing;GO:0045814 negative regulation of gene expression, epigenetic;GO:0045892 negative regulation of transcription, DNA-templated							0	1	0	0	0	0	0	0	0	0	0	0	0	0	0	0	0	0	0	0	1
3611	3611	0	0	1	3611	Gene_ID	H. sapiens	3611	H. sapiens	ILK	integrin linked kinase	GO:0001658 branching involved in ureteric bud morphogenesis;GO:0060675 ureteric bud morphogenesis;GO:0072171 mesonephric tubule morphogenesis	TKL Ser/Thr protein kinase family	Enzymes/{ENZYME proteins/Transferases,Kinases/TKL Ser/Thr protein kinases}	Cell Junctions;Focal adhesion sites(Enhanced)		(M12771)SA PTEN PATHWAY; (M63)PID AVB3 OPN PATHWAY; (M71)PID ILK PATHWAY		0	0	0	1	0	1	0	1	0	0	0	0	0	0	0	0	0	0	0	1	1
29969	29969	1	0	0	29969	Gene_ID	H. sapiens	29969	H. sapiens	MDFIC	MyoD family inhibitor domain containing	GO:0007257 activation of JUN kinase activity;GO:0042308 negative regulation of protein import into nucleus;GO:0050434 positive regulation of viral transcription			Nucleoplasm(Supported)Golgi apparatus(Approved)		(M223)PID BETA CATENIN NUC PATHWAY		0	0	0	0	0	0	0	0	0	0	0	1	0	0	0	0	0	0	0	0	1
3107	3107	1	0	0	3107	Gene_ID	H. sapiens	3107	H. sapiens	HLA-C	major histocompatibility complex, class I, C	GO:0002480 antigen processing and presentation of exogenous peptide antigen via MHC class I, TAP-independent;GO:0002479 antigen processing and presentation of exogenous peptide antigen via MHC class I, TAP-dependent;GO:0042590 antigen processing and presentation of exogenous peptide antigen via MHC class I						(M5911)HALLMARK INTERFERON ALPHA RESPONSE	1	0	1	0	1	0	0	0	0	0	0	0	0	0	0	0	1	0	0	0	1
3008	3008	0	0	1	3008	Gene_ID	H. sapiens	3008	H. sapiens	H1-4	H1.4 linker histone, cluster member	GO:0098532 histone H3-K27 trimethylation;GO:0080182 histone H3-K4 trimethylation;GO:0031936 negative regulation of chromatin silencing			Nuclear speckles(Supported)		(M32)PID HDAC CLASSIII PATHWAY		0	1	0	0	0	0	0	0	0	0	0	0	1	0	0	0	0	0	0	0	1
100293534	100293534	0	0	1	100293534	Gene_ID	H. sapiens	100293534	H. sapiens	C4B_2	complement component 4B (Chido blood group), copy 2					Immune Globulin Human (Endopeptidase inhibitor activity)			0	0	1	0	0	0	0	0	0	0	0	0	0	0	0	0	0	0	0	0	1
10094	10094	0	0	1	10094	Gene_ID	H. sapiens	10094	H. sapiens	ARPC3	actin related protein 2/3 complex subunit 3	GO:0034314 Arp2/3 complex-mediated actin nucleation;GO:0038096 Fc-gamma receptor signaling pathway involved in phagocytosis;GO:0045010 actin nucleation			Nucleoplasm(Uncertain)	N-[2-(2-methyl-1H-indol-3-yl)ethyl]thiophene-2-carboxamide (Structural constituent of cytoskeleton);(2S)-2-(3-bromophenyl)-3-(5-chloro-2-hydroxyphenyl)-1,3-thiazolidin-4-one (Structural constituent of cytoskeleton)	(M278)PID RAC1 PATHWAY; (M81)PID CDC42 PATHWAY; (M164)PID ERBB1 DOWNSTREAM PATHWAY	(M5923)HALLMARK PI3K AKT MTOR SIGNALING	0	1	0	0	1	1	0	1	0	0	0	0	0	0	0	0	0	1	0	0	1
8766	8766	0	0	1	8766	Gene_ID	H. sapiens	8766	H. sapiens	RAB11A	RAB11A, member RAS oncogene family	GO:0098887 neurotransmitter receptor transport, endosome to postsynaptic membrane;GO:0099639 neurotransmitter receptor transport, endosome to plasma membrane;GO:0098969 neurotransmitter receptor transport to postsynaptic membrane			Microtubule organizing center;Vesicles(Enhanced)	5'-Guanosine-Diphosphate-Monothiophosphate (Syntaxin binding);Guanosine-5'-Diphosphate (Syntaxin binding)	(M120)PID ARF6 DOWNSTREAM PATHWAY; (M210)PID IL8 CXCR2 PATHWAY; (M99)PID TXA2PATHWAY		0	0	1	1	1	1	1	1	0	0	0	1	0	0	1	1	0	0	0	0	1
718	718	0	0	1	718	Gene_ID	H. sapiens	718	H. sapiens	C3	complement C3	GO:0001798 positive regulation of type IIa hypersensitivity;GO:0001970 positive regulation of activation of membrane attack complex;GO:0002894 positive regulation of type II hypersensitivity				Immune Globulin Human (Receptor binding);S-Hydroxycysteine (Receptor binding)	(M119)PID ERB GENOMIC PATHWAY; (M169)PID INTEGRIN2 PATHWAY; (M200)PID ERA GENOMIC PATHWAY	(M5946)HALLMARK COAGULATION; (M5905)HALLMARK ADIPOGENESIS; (M5921)HALLMARK COMPLEMENT	1	1	1	1	0	1	1	0	1	0	1	0	1	0	1	0	1	1	0	0	1
83658	83658	0	0	1	83658	Gene_ID	H. sapiens	83658	H. sapiens	DYNLRB1	dynein light chain roadblock-type 1	GO:0035735 intraciliary transport involved in cilium assembly;GO:0042073 intraciliary transport;GO:0007632 visual behavior					(M286)PID TGFBR PATHWAY		0	0	0	0	0	0	0	0	0	0	0	0	0	0	0	1	0	0	0	0	1
51170	51170	0	0	1	51170	Gene_ID	H. sapiens	51170	H. sapiens	HSD17B11	hydroxysteroid 17-beta dehydrogenase 11	GO:0006710 androgen catabolic process;GO:0006703 estrogen biosynthetic process;GO:0008209 androgen metabolic process		Enzymes/ENZYME proteins/Oxidoreductases	Lipid droplets(Supported)	Aetiocholanolone (Steroid dehydrogenase activity)		(M5949)HALLMARK PEROXISOME; (M5948)HALLMARK BILE ACID METABOLISM; (M5935)HALLMARK FATTY ACID METABOLISM	0	0	0	0	0	0	0	0	0	0	0	0	0	0	0	0	0	0	0	0	1
7791	7791	0	0	1	7791	Gene_ID	H. sapiens	7791	H. sapiens	ZYX	zyxin	GO:0043149 stress fiber assembly;GO:0030038 contractile actin filament bundle assembly;GO:0071346 cellular response to interferon-gamma			Focal adhesion sites(Supported)		(M184)PID ECADHERIN KERATINOCYTE PATHWAY; (M232)PID ECADHERIN STABILIZATION PATHWAY; (M238)PID THROMBIN PAR1 PATHWAY	(M5915)HALLMARK APICAL JUNCTION	0	0	1	1	0	1	0	0	0	0	0	0	0	0	0	0	0	0	0	1	1
6352	6352	0	0	1	6352	Gene_ID	H. sapiens	6352	H. sapiens	CCL5	C-C motif chemokine ligand 5	GO:0010536 positive regulation of activation of Janus kinase activity;GO:2000503 positive regulation of natural killer cell chemotaxis;GO:0043922 negative regulation by host of viral transcription				Heparin Disaccharide I-S (Receptor signaling protein tyrosine kinase activator activity);Heparin Disaccharide Iii-S (Receptor signaling protein tyrosine kinase activator activity)	(M165)PID SYNDECAN 4 PATHWAY; (M198)PID SYNDECAN 1 PATHWAY; (M254)PID MYC REPRESS PATHWAY	(M5932)HALLMARK INFLAMMATORY RESPONSE; (M5913)HALLMARK INTERFERON GAMMA RESPONSE; (M5921)HALLMARK COMPLEMENT	1	0	1	1	0	0	0	0	0	0	1	1	1	0	0	0	1	0	0	0	1
6902	6902	0	0	1	6902	Gene_ID	H. sapiens	6902	H. sapiens	TBCA	tubulin folding cofactor A	GO:0007023 post-chaperonin tubulin folding pathway;GO:0007021 tubulin complex assembly;GO:0006457 protein folding			Microtubules;Nucleoli(Supported)				0	0	0	0	0	0	0	0	0	0	0	0	0	0	0	0	0	0	0	0	1
6747	6747	0	0	1	6747	Gene_ID	H. sapiens	6747	H. sapiens	SSR3	signal sequence receptor subunit 3	GO:0006614 SRP-dependent cotranslational protein targeting to membrane;GO:0006613 cotranslational protein targeting to membrane;GO:0045047 protein targeting to ER			Cytosol(Uncertain)			(M5934)HALLMARK XENOBIOTIC METABOLISM	0	0	0	0	1	0	0	0	0	0	0	0	0	0	0	0	0	0	0	0	1
3015	3015	0	0	1	3015	Gene_ID	H. sapiens	3015	H. sapiens	H2AZ1	H2A.Z variant histone 1	GO:0071392 cellular response to estradiol stimulus;GO:0006342 chromatin silencing;GO:0032355 response to estradiol			Nucleoplasm(Supported)		(M195)PID CMYB PATHWAY	(M5935)HALLMARK FATTY ACID METABOLISM; (M5925)HALLMARK E2F TARGETS; (M5901)HALLMARK G2M CHECKPOINT	0	1	0	0	0	0	0	0	0	0	0	0	0	0	0	0	0	0	0	0	1
5879	5879	0	1	0	5879	Gene_ID	H. sapiens	5879	H. sapiens	RAC1	Rac family small GTPase 1	GO:0090023 positive regulation of neutrophil chemotaxis;GO:0032707 negative regulation of interleukin-23 production;GO:0035774 positive regulation of insulin secretion involved in cellular response to glucose stimulus		RAS pathway related proteins	Cytosol;Nucleoli;Nucleus(Approved)	Guanosine-5'-Diphosphate (Thioesterase binding)	(M120)PID ARF6 DOWNSTREAM PATHWAY; (M273)PID EPHA2 FWD PATHWAY; (M243)PID ARF 3PATHWAY	(M5923)HALLMARK PI3K AKT MTOR SIGNALING; (M5946)HALLMARK COAGULATION	1	1	1	1	1	1	1	1	1	0	0	1	1	0	0	1	1	1	0	1	1
51552	51552	0	0	1	51552	Gene_ID	H. sapiens	51552	H. sapiens	RAB14	RAB14, member RAS oncogene family	GO:0090387 phagolysosome assembly involved in apoptotic cell clearance;GO:0090386 phagosome maturation involved in apoptotic cell clearance;GO:0001845 phagolysosome assembly			Vesicles(Supported)			(M5910)HALLMARK PROTEIN SECRETION	1	0	1	0	1	0	0	0	0	0	1	0	1	0	0	0	0	1	0	0	1
720	720	0	0	1	720	Gene_ID	H. sapiens	720	H. sapiens	C4A	complement C4A (Rodgers blood group)	GO:2000427 positive regulation of apoptotic cell clearance;GO:2000425 regulation of apoptotic cell clearance;GO:0006958 complement activation, classical pathway		Blood group antigen proteins		Immune Globulin Human (Endopeptidase inhibitor activity)			0	1	1	0	0	1	1	0	0	0	0	0	1	0	0	0	0	1	0	0	1
325	325	0	1	0	325	Gene_ID	H. sapiens	325	H. sapiens	APCS	amyloid P component, serum	GO:0044869 negative regulation by host of viral exo-alpha-sialidase activity;GO:0044866 modulation by host of viral exo-alpha-sialidase activity;GO:0052403 negative regulation by host of symbiont catalytic activity		Transporters/Transporter channels and pores		Methyl 4,6-O-[(1r)-1-Carboxyethylidene]-Beta-D-Galactopyranoside (Virion binding);BIS-1,2-{[(Z)-2-CARBOXY-2-METHYL-1,3-DIOXANE]-5-YLOXYCARBAMOYL}-ETHANE (Virion binding);BIS-1,2-{[(Z)-2CARBOXY-2-METHYL-1,3-DIOXANE]-5-YLOXYCARBONYL}-PIPERAZINE (Virion binding)			0	1	1	1	0	1	0	0	0	1	0	0	0	0	0	0	0	0	0	0	1
51762	51762	0	0	1	51762	Gene_ID	H. sapiens	51762	H. sapiens	RAB8B	RAB8B, member RAS oncogene family	GO:0051461 positive regulation of corticotropin secretion;GO:0051459 regulation of corticotropin secretion;GO:0045046 protein import into peroxisome membrane			Vesicles(Supported)Nucleoplasm(Uncertain)	Phosphoaminophosphonic Acid Guanylate Ester (Receptor binding);Guanosine-5'-Diphosphate (Receptor binding)			0	0	0	1	1	0	1	1	0	0	0	1	0	0	0	1	0	0	0	0	1
1191	1191	0	1	0	1191	Gene_ID	H. sapiens	1191	H. sapiens	CLU	clusterin	GO:1905892 negative regulation of cellular response to thapsigargin;GO:1905895 negative regulation of cellular response to tunicamycin;GO:0061740 protein targeting to lysosome involved in chaperone-mediated autophagy					(M254)PID MYC REPRESS PATHWAY	(M5892)HALLMARK CHOLESTEROL HOMEOSTASIS; (M5946)HALLMARK COAGULATION; (M5902)HALLMARK APOPTOSIS	1	0	1	1	0	1	1	0	1	0	1	0	1	0	1	0	0	0	0	0	1
1984	1984	0	0	1	1984	Gene_ID	H. sapiens	1984	H. sapiens	EIF5A	eukaryotic translation initiation factor 5A	GO:0045905 positive regulation of translational termination;GO:0045901 positive regulation of translational elongation;GO:0006452 translational frameshifting		Transporters/Transporter channels and pores	Cytosol;Nucleoplasm(Enhanced)			(M5950)HALLMARK ALLOGRAFT REJECTION	0	0	0	0	0	0	0	0	0	0	0	0	0	0	0	1	0	0	0	0	1
3700	3700	0	1	0	3700	Gene_ID	H. sapiens	3700	H. sapiens	ITIH4	inter-alpha-trypsin inhibitor heavy chain 4	GO:0030212 hyaluronan metabolic process;GO:0002576 platelet degranulation;GO:0006953 acute-phase response			Vesicles(Approved)		(M3468)NABA ECM REGULATORS; (M5885)NABA MATRISOME ASSOCIATED; (M5889)NABA MATRISOME	(M5934)HALLMARK XENOBIOTIC METABOLISM	1	0	1	1	0	0	0	0	0	1	0	0	0	0	0	0	0	0	0	0	1
3018	3018	0	0	1	3018	Gene_ID	H. sapiens	3018	H. sapiens	H2BC3	H2B clustered histone 3	GO:0006334 nucleosome assembly;GO:0031497 chromatin assembly;GO:0034728 nucleosome organization			Cytosol;Nucleoplasm(Approved)			(M5953)HALLMARK KRAS SIGNALING UP	0	1	0	0	0	0	0	0	0	0	0	0	0	0	0	0	0	0	0	0	1
54205	54205	0	0	1	54205	Gene_ID	H. sapiens	54205	H. sapiens	CYCS	cytochrome c, somatic	GO:0008635 activation of cysteine-type endopeptidase activity involved in apoptotic process by cytochrome c;GO:0006122 mitochondrial electron transport, ubiquinol to cytochrome c;GO:0006123 mitochondrial electron transport, cytochrome c to oxygen			Mitochondria(Enhanced)	Minocycline (Metal ion binding);Protoporphyrin Ix Containing Co (Metal ion binding);Heme C (Metal ion binding);Protoporphyrin Ix Containing Zn (Metal ion binding);N-Trimethyllysine (Metal ion binding);Zinc Substituted Heme C (Metal ion binding)	(M197)PID HIV NEF PATHWAY; (M144)PID CERAMIDE PATHWAY; (M220)PID CASPASE PATHWAY	(M5936)HALLMARK OXIDATIVE PHOSPHORYLATION	0	1	1	0	0	0	0	0	0	0	0	0	0	0	1	1	1	0	0	0	1
6288	6288	0	0	1	6288	Gene_ID	H. sapiens	6288	H. sapiens	SAA1	serum amyloid A1	GO:0050716 positive regulation of interleukin-1 secretion;GO:0050704 regulation of interleukin-1 secretion;GO:0048246 macrophage chemotaxis				Human Serum Albumin (Heparin binding);Serum albumin iodonated (Heparin binding)	(M264)PID TOLL ENDOGENOUS PATHWAY		0	1	1	1	1	0	0	0	1	1	0	1	0	0	0	0	1	0	0	0	1
5265	5265	0	0	1	5265	Gene_ID	H. sapiens	5265	H. sapiens	SERPINA1	serpin family A member 1	GO:0048208 COPII vesicle coating;GO:0048207 vesicle targeting, rough ER to cis-Golgi;GO:0048199 vesicle targeting, to, from or within Golgi			Vesicles(Enhanced)	2-[3,4-Dihydroxy-2-Hydroxymethyl-5-(2-Hydroxy-Nonyl)-Tetrahydro-Furan-2-Yloxy]-6-Hydroxymethyl-Tetra Hydro-Pyran-3,4,5-Triol (Serine-type endopeptidase inhibitor activity);Beta-Mercaptoethanol (Serine-type endopeptidase inhibitor activity);Recombinant alpha 1-antitrypsin (Serine-type endopeptidase inhibitor activity)	(M285)PID HNF3A PATHWAY; (M19)PID P73PATHWAY; (M3468)NABA ECM REGULATORS	(M5946)HALLMARK COAGULATION; (M5921)HALLMARK COMPLEMENT; (M5907)HALLMARK ESTROGEN RESPONSE LATE	1	0	1	1	1	0	0	0	0	1	0	0	0	0	0	0	0	0	0	0	1
100423062	100423062	0	0	1	100423062	Gene_ID	H. sapiens	100423062	H. sapiens	IGLL5	immunoglobulin lambda like polypeptide 5	GO:0006958 complement activation, classical pathway;GO:0050853 B cell receptor signaling pathway;GO:0002455 humoral immune response mediated by circulating immunoglobulin							0	0	1	0	0	1	0	0	0	0	1	0	0	0	0	0	0	1	0	0	1
100528017	100528017	0	0	1	100528017	Gene_ID	H. sapiens	100528017	H. sapiens	SAA2-SAA4	SAA2-SAA4 readthrough								0	0	0	0	0	0	0	0	0	0	0	0	0	0	0	0	0	0	0	0	1
4830	4830	0	0	1	4830	Gene_ID	H. sapiens	4830	H. sapiens	NME1	NME/NM23 nucleoside diphosphate kinase 1	GO:0006183 GTP biosynthetic process;GO:0006228 UTP biosynthetic process;GO:0006241 CTP biosynthetic process		Enzymes/ENZYME proteins/Transferases	Cytosol(Enhanced)Nucleoplasm(Supported)	2'-Deoxyguanosine-5'-Triphosphate (Ribosomal small subunit binding);Selenocysteine (Ribosomal small subunit binding);2',3'-Dehydro-2',3'-Deoxy-Thymidine 5'-Diphosphate (Ribosomal small subunit binding);Adenosine Phosphonoacetic Acid (Ribosomal small subunit binding);2',3'-Dehydro-2',3'-Deoxy-Thymidine 5'-Triphosphate (Ribosomal small subunit binding);Thymidine-5'- Diphosphate (Ribosomal small sub…	(M120)PID ARF6 DOWNSTREAM PATHWAY; (M83)PID CDC42 REG PATHWAY; (M156)PID ECADHERIN NASCENT AJ PATHWAY	(M5898)HALLMARK DNA REPAIR; (M5950)HALLMARK ALLOGRAFT REJECTION; (M5925)HALLMARK E2F TARGETS	0	0	0	1	0	0	0	1	0	0	0	0	0	0	1	0	0	0	0	0	1
6201	6201	0	0	1	6201	Gene_ID	H. sapiens	6201	H. sapiens	RPS7	ribosomal protein S7	GO:1904667 negative regulation of ubiquitin protein ligase activity;GO:1902255 positive regulation of intrinsic apoptotic signaling pathway by p53 class mediator;GO:0051444 negative regulation of ubiquitin-protein transferase activity		Ribosomal proteins	Cytosol;Endoplasmic reticulum(Approved)				0	1	1	0	1	0	0	0	0	0	0	0	0	0	0	0	0	0	0	0	1
1603	1603	0	0	1	1603	Gene_ID	H. sapiens	1603	H. sapiens	DAD1	defender against cell death 1	GO:0018279 protein N-linked glycosylation via asparagine;GO:0018196 peptidyl-asparagine modification;GO:0001824 blastocyst development			Cytosol(Approved)			(M5898)HALLMARK DNA REPAIR	0	0	0	0	0	0	0	0	0	0	0	0	0	0	0	0	0	0	0	0	1
2791	2791	0	0	1	2791	Gene_ID	H. sapiens	2791	H. sapiens	GNG11	G protein subunit gamma 11	GO:0007186 G protein-coupled receptor signaling pathway;GO:0007165 signal transduction;GO:0023052 signaling		RAS pathway related proteins				(M5953)HALLMARK KRAS SIGNALING UP	0	1	0	1	0	1	0	0	0	0	0	0	0	0	0	0	1	0	0	0	1
85236	85236	0	0	1	85236	Gene_ID	H. sapiens	85236	H. sapiens	H2BC12	H2B clustered histone 12	GO:0002227 innate immune response in mucosa;GO:0019731 antibacterial humoral response;GO:0002385 mucosal immune response			Cytosol;Nucleoplasm(Approved)			(M5901)HALLMARK G2M CHECKPOINT	0	1	1	0	0	0	0	0	0	0	1	0	0	0	0	0	0	0	0	0	1
9230	9230	0	1	0	9230	Gene_ID	H. sapiens	9230	H. sapiens	RAB11B	RAB11B, member RAS oncogene family	GO:0032402 melanosome transport;GO:0033572 transferrin transport;GO:0045054 constitutive secretory pathway			Microtubule organizing center;Vesicles(Approved)				1	0	1	1	1	0	1	0	0	0	0	1	0	1	1	0	0	0	0	0	1
51411	51411	0	0	1	51411	Gene_ID	H. sapiens	51411	H. sapiens	BIN2	bridging integrator 2	GO:0097320 plasma membrane tubulation;GO:0043312 neutrophil degranulation;GO:0071800 podosome assembly							1	0	0	0	0	0	0	0	0	0	0	0	0	0	0	0	1	1	0	0	1
101059953	101059953	1	0	0	101059953	Gene_ID	H. sapiens	101059953	H. sapiens	NPIPA8	nuclear pore complex interacting protein family member A8				Nucleoplasm(Approved)				0	0	0	0	0	0	0	0	0	0	0	0	0	0	0	0	0	0	0	0	1
136319	136319	0	1	0	136319	Gene_ID	H. sapiens	136319	H. sapiens	MTPN	myotrophin	GO:0021707 cerebellar granule cell differentiation;GO:2000812 regulation of barbed-end actin filament capping;GO:0021684 cerebellar granular layer formation			Cytosol;Plasma membrane(Approved)				0	0	0	1	0	1	0	1	0	0	0	0	1	0	1	0	0	0	0	0	1
7170	7170	0	0	1	7170	Gene_ID	H. sapiens	7170	H. sapiens	TPM3	tropomyosin 3	GO:0030049 muscle filament sliding;GO:0033275 actin-myosin filament sliding;GO:0070252 actin-mediated cell contraction			Actin filaments;Cytosol(Approved)			(M5909)HALLMARK MYOGENESIS	0	0	0	0	0	1	0	0	0	0	0	0	0	0	0	0	0	0	1	0	1
4697	4697	0	1	0	4697	Gene_ID	H. sapiens	4697	H. sapiens	NDUFA4	NDUFA4 mitochondrial complex associated	GO:0006123 mitochondrial electron transport, cytochrome c to oxygen;GO:0006120 mitochondrial electron transport, NADH to ubiquinone;GO:0042775 mitochondrial ATP synthesis coupled electron transport			Mitochondria(Supported)	NADH (Protein complex binding)		(M5936)HALLMARK OXIDATIVE PHOSPHORYLATION	0	0	0	0	0	0	0	0	0	0	0	0	0	0	0	0	0	0	0	0	1
344	344	0	0	1	344	Gene_ID	H. sapiens	344	H. sapiens	APOC2	apolipoprotein C2	GO:0010902 positive regulation of very-low-density lipoprotein particle remodeling;GO:0010901 regulation of very-low-density lipoprotein particle remodeling;GO:0060697 positive regulation of phospholipid catabolic process						(M5946)HALLMARK COAGULATION	0	1	0	1	0	0	1	0	1	0	0	0	1	0	0	0	1	0	0	0	1
1345	1345	0	1	0	1345	Gene_ID	H. sapiens	1345	H. sapiens	COX6C	cytochrome c oxidase subunit 6C	GO:0006123 mitochondrial electron transport, cytochrome c to oxygen;GO:0042775 mitochondrial ATP synthesis coupled electron transport;GO:0042773 ATP synthesis coupled electron transport			Mitochondria(Enhanced)	Cholic Acid (Cytochrome-c oxidase activity);N-Formylmethionine (Cytochrome-c oxidase activity)		(M5936)HALLMARK OXIDATIVE PHOSPHORYLATION; (M5907)HALLMARK ESTROGEN RESPONSE LATE	0	0	0	0	0	0	0	0	0	0	0	0	0	0	0	0	0	0	1	0	1
57142	57142	0	0	1	57142	Gene_ID	H. sapiens	57142	H. sapiens	RTN4	reticulon 4	GO:0034165 positive regulation of toll-like receptor 9 signaling pathway;GO:1905580 positive regulation of ERBB3 signaling pathway;GO:0034163 regulation of toll-like receptor 9 signaling pathway			Endoplasmic reticulum(Enhanced)		(M153)PID P75 NTR PATHWAY		0	0	0	1	0	1	0	1	0	0	0	0	1	0	0	0	0	0	0	0	1
721	721	0	0	1	721	Gene_ID	H. sapiens	721	H. sapiens	C4B	complement C4B (Chido blood group)	GO:2000427 positive regulation of apoptotic cell clearance;GO:0032490 detection of molecule of bacterial origin;GO:0008228 opsonization		Blood group antigen proteins					0	1	1	0	0	1	1	0	0	0	1	0	1	0	0	0	0	1	0	0	1
2	2	0	0	1	2	Gene_ID	H. sapiens	2	H. sapiens	A2M	alpha-2-macroglobulin	GO:0001869 negative regulation of complement activation, lectin pathway;GO:0001868 regulation of complement activation, lectin pathway;GO:0045916 negative regulation of complement activation				Becaplermin (Tumor necrosis factor binding);Bacitracin (Tumor necrosis factor binding);Ocriplasmin (Tumor necrosis factor binding)	(M183)PID IL6 7 PATHWAY; (M3468)NABA ECM REGULATORS; (M5885)NABA MATRISOME ASSOCIATED	(M5897)HALLMARK IL6 JAK STAT3 SIGNALING; (M5946)HALLMARK COAGULATION	1	1	1	1	1	1	0	0	0	0	0	0	1	0	0	0	0	0	0	0	1
101059938	101059938	1	0	0	101059938	Gene_ID	H. sapiens	101059938	H. sapiens	NPIPA7	nuclear pore complex interacting protein family member A7				Nucleoplasm(Approved)				0	0	0	0	0	0	0	0	0	0	0	0	0	0	0	0	0	0	0	0	1
2243	2243	0	0	1	2243	Gene_ID	H. sapiens	2243	H. sapiens	FGA	fibrinogen alpha chain	GO:0072377 blood coagulation, common pathway;GO:0045907 positive regulation of vasoconstriction;GO:0043152 induction of bacterial agglutination				Alteplase (Structural molecule activity);Reteplase (Structural molecule activity);Anistreplase (Structural molecule activity);Tenecteplase (Structural molecule activity);Sucralfate (Structural molecule activity);Alfimeprase (Structural molecule activity);Ancrod (Structural molecule activity);EP-2104R (Structural molecule activity)	(M169)PID INTEGRIN2 PATHWAY; (M257)PID EPHRINB REV PATHWAY; (M174)PID UPA UPAR PATHWAY	(M5946)HALLMARK COAGULATION	1	1	1	1	1	1	1	1	0	0	1	1	0	0	0	0	0	0	0	0	1
7168	7168	0	0	1	7168	Gene_ID	H. sapiens	7168	H. sapiens	TPM1	tropomyosin 1	GO:0003065 positive regulation of heart rate by epinephrine;GO:0001996 positive regulation of heart rate by epinephrine-norepinephrine;GO:0003321 positive regulation of blood pressure by epinephrine-norepinephrine			Actin filaments;Cytosol(Approved)			(M5930)HALLMARK EPITHELIAL MESENCHYMAL TRANSITION	0	0	0	1	0	1	0	1	0	0	0	0	0	0	0	0	0	0	1	0	1
308	308	0	0	1	308	Gene_ID	H. sapiens	308	H. sapiens	ANXA5	annexin A5	GO:0002576 platelet degranulation;GO:0070588 calcium ion transmembrane transport;GO:0007596 blood coagulation		Transporters/Transporter channels and pores	Nuclear membrane(Approved)	L-Alpha-Glycerophosphorylserine (Phospholipid binding);L-thioproline (Phospholipid binding);K201 (Phospholipid binding);L-Alpha-Glycerophosphorylethanolamine (Phospholipid binding);1,4-Dideoxy-O2-Sulfo-Glucuronic Acid (Phospholipid binding);N,O6-Disulfo-Glucosamine (Phospholipid binding);1,4-Dideoxy-5-Dehydro-O2-Sulfo-Glucuronic Acid (Phospholipid binding)	(M5880)NABA ECM AFFILIATED; (M5885)NABA MATRISOME ASSOCIATED; (M5889)NABA MATRISOME	(M5892)HALLMARK CHOLESTEROL HOMEOSTASIS; (M5921)HALLMARK COMPLEMENT	1	0	0	1	0	0	0	0	0	0	0	0	0	0	0	0	0	0	0	0	1
10525	10525	0	0	1	10525	Gene_ID	H. sapiens	10525	H. sapiens	HYOU1	hypoxia up-regulated 1	GO:1903382 negative regulation of endoplasmic reticulum stress-induced neuron intrinsic apoptotic signaling pathway;GO:1903381 regulation of endoplasmic reticulum stress-induced neuron intrinsic apoptotic signaling pathway;GO:1903298 negative regulation of hypoxia-induced intrinsic apoptotic signaling pathway						(M5922)HALLMARK UNFOLDED PROTEIN RESPONSE	0	0	0	0	1	0	0	0	1	0	0	0	0	0	0	0	0	0	0	0	1
11230	11230	0	0	1	11230	Gene_ID	H. sapiens	11230	H. sapiens	PRAF2	PRA1 domain family member 2	GO:0015813 L-glutamate transmembrane transport;GO:1902475 L-alpha-amino acid transmembrane transport;GO:0015800 acidic amino acid transport		Transporters	Endoplasmic reticulum;Vesicles(Approved)			(M5947)HALLMARK IL2 STAT5 SIGNALING	0	0	0	0	0	0	0	0	0	0	0	0	0	0	0	0	0	0	0	0	1
81876	81876	0	1	0	81876	Gene_ID	H. sapiens	81876	H. sapiens	RAB1B	RAB1B, member RAS oncogene family	GO:0090557 establishment of endothelial intestinal barrier;GO:0048208 COPII vesicle coating;GO:0048207 vesicle targeting, rough ER to cis-Golgi			Endoplasmic reticulum;Golgi apparatus(Supported)				0	1	1	0	1	0	0	0	0	0	0	0	0	0	0	0	0	0	0	0	1
6275	6275	0	0	1	6275	Gene_ID	H. sapiens	6275	H. sapiens	S100A4	S100 calcium binding protein A4	GO:0001837 epithelial to mesenchymal transition;GO:0043123 positive regulation of I-kappaB kinase/NF-kappaB signaling;GO:0043122 regulation of I-kappaB kinase/NF-kappaB signaling			Plasma membrane(Enhanced)	Trifluoperazine (Rage receptor binding)	(M5883)NABA SECRETED FACTORS; (M5885)NABA MATRISOME ASSOCIATED; (M5889)NABA MATRISOME	(M5944)HALLMARK ANGIOGENESIS; (M5939)HALLMARK P53 PATHWAY; (M5891)HALLMARK HYPOXIA	0	0	0	0	0	0	0	0	0	0	0	0	0	0	0	0	0	0	0	0	1
2244	2244	0	0	1	2244	Gene_ID	H. sapiens	2244	H. sapiens	FGB	fibrinogen beta chain	GO:0045907 positive regulation of vasoconstriction;GO:0043152 induction of bacterial agglutination;GO:0042730 fibrinolysis			Endoplasmic reticulum(Enhanced)	Sucralfate (Structural molecule activity);Alfimeprase (Structural molecule activity)	(M169)PID INTEGRIN2 PATHWAY; (M257)PID EPHRINB REV PATHWAY; (M174)PID UPA UPAR PATHWAY		1	0	1	1	1	1	1	1	0	0	1	1	0	0	0	0	0	0	0	0	1
3133	3133	1	0	0	3133	Gene_ID	H. sapiens	3133	H. sapiens	HLA-E	major histocompatibility complex, class I, E	GO:0001815 positive regulation of antibody-dependent cellular cytotoxicity;GO:0001813 regulation of antibody-dependent cellular cytotoxicity;GO:0001798 positive regulation of type IIa hypersensitivity			Vesicles(Approved)			(M5950)HALLMARK ALLOGRAFT REJECTION	1	0	1	1	1	0	0	0	0	0	1	1	0	0	0	0	1	0	0	0	1
5303	5303	1	0	0	5303	Gene_ID	H. sapiens	5303	H. sapiens	PIN4	peptidylprolyl cis/trans isomerase, NIMA-interacting 4	GO:0000413 protein peptidyl-prolyl isomerization;GO:0018208 peptidyl-proline modification;GO:0018193 peptidyl-amino acid modification		Enzymes/ENZYME proteins/Isomerase	Nucleoli;Nucleus(Supported)				0	0	0	0	0	0	0	0	0	0	0	0	0	0	0	0	0	0	0	0	1
30845	30845	0	0	1	30845	Gene_ID	H. sapiens	30845	H. sapiens	EHD3	EH domain containing 3	GO:1901387 positive regulation of voltage-gated calcium channel activity;GO:1901021 positive regulation of calcium ion transmembrane transporter activity;GO:1901385 regulation of voltage-gated calcium channel activity			Plasma membrane(Approved)				0	0	0	1	1	0	0	0	0	0	0	0	0	0	0	1	0	0	0	0	1
339044	101060412	1	0	0	339044	Gene_ID	H. sapiens	339044	H. sapiens	PKD1P1	polycystin 1, transient receptor potential channel interacting pseudogene 1								0	0	0	0	0	0	0	0	0	0	0	0	0	0	0	0	0	0	0	0	1
22919	22919	0	0	1	22919	Gene_ID	H. sapiens	22919	H. sapiens	MAPRE1	microtubule associated protein RP/EB family member 1	GO:1903033 positive regulation of microtubule plus-end binding;GO:1904825 protein localization to microtubule plus-end;GO:1903031 regulation of microtubule plus-end binding			Cytosol;Microtubule organizing center(Enhanced)		(M266)PID NCADHERIN PATHWAY	(M5893)HALLMARK MITOTIC SPINDLE	0	1	0	0	1	1	0	0	0	0	0	0	1	0	1	1	0	0	0	0	1
642131	642131	0	0	1	642131	Gene_ID	H. sapiens	642131	H. sapiens	LOC642131	immunoglobulin IGHV1OR15-3-like pseudogene								0	0	0	0	0	0	0	0	0	0	0	0	0	0	0	0	0	0	0	0	1
3094	3094	0	0	1	3094	Gene_ID	H. sapiens	3094	H. sapiens	HINT1	histidine triad nucleotide binding protein 1	GO:0009154 purine ribonucleotide catabolic process;GO:0009261 ribonucleotide catabolic process;GO:0006195 purine nucleotide catabolic process			Cytosol;Nucleus;Plasma membrane(Supported)	Adenosine monophosphate (Protein kinase c binding);Guanosine-5'-Monophosphate (Protein kinase c binding);5'-O-(N-Ethyl-Sulfamoyl)Adenosine (Protein kinase c binding);Adenosine-5'-Ditungstate (Protein kinase c binding);8-Bromo-Adenosine-5'-Monophosphate (Protein kinase c binding)		(M5939)HALLMARK P53 PATHWAY	0	0	0	0	0	0	0	0	0	0	0	0	0	0	0	0	0	0	0	0	1
5908	5908	0	0	1	5908	Gene_ID	H. sapiens	5908	H. sapiens	RAP1B	RAP1B, member of RAS oncogene family	GO:2000301 negative regulation of synaptic vesicle exocytosis;GO:1902804 negative regulation of synaptic vesicle transport;GO:0045955 negative regulation of calcium ion-dependent exocytosis		RAS pathway related proteins			(M72)PID NECTIN PATHWAY; (M270)PID MAPK TRK PATHWAY; (M156)PID ECADHERIN NASCENT AJ PATHWAY		1	0	0	1	1	1	1	0	0	0	0	1	0	0	0	1	0	0	0	1	1
9843	9843	0	1	0	9843	Gene_ID	H. sapiens	9843	H. sapiens	HEPH	hephaestin	GO:0006879 cellular iron ion homeostasis;GO:0006825 copper ion transport;GO:0055072 iron ion homeostasis							0	0	0	0	0	0	0	0	0	0	0	0	0	1	0	0	0	0	0	0	1
4218	4218	0	0	1	4218	Gene_ID	H. sapiens	4218	H. sapiens	RAB8A	RAB8A, member RAS oncogene family	GO:0098887 neurotransmitter receptor transport, endosome to postsynaptic membrane;GO:0099639 neurotransmitter receptor transport, endosome to plasma membrane;GO:0098969 neurotransmitter receptor transport to postsynaptic membrane			Nucleus;Plasma membrane(Supported)				0	1	1	0	1	0	1	1	0	0	0	1	0	0	0	1	0	0	0	0	1
1465	1465	0	0	1	1465	Gene_ID	H. sapiens	1465	H. sapiens	CSRP1	cysteine and glycine rich protein 1	GO:0070527 platelet aggregation;GO:0045214 sarcomere organization;GO:0030239 myofibril assembly						(M5946)HALLMARK COAGULATION; (M5921)HALLMARK COMPLEMENT	0	1	0	1	0	1	0	0	0	0	0	0	0	0	0	0	0	0	0	0	1
6280	6280	0	0	1	6280	Gene_ID	H. sapiens	6280	H. sapiens	S100A9	S100 calcium binding protein A9	GO:0032119 sequestering of zinc ion;GO:0070488 neutrophil aggregation;GO:0035606 peptidyl-cysteine S-trans-nitrosylation			Cell Junctions;Cytosol(Supported)Nucleoplasm(Uncertain)		(M264)PID TOLL ENDOGENOUS PATHWAY; (M5883)NABA SECRETED FACTORS; (M5885)NABA MATRISOME ASSOCIATED	(M5921)HALLMARK COMPLEMENT; (M5907)HALLMARK ESTROGEN RESPONSE LATE	1	1	1	1	0	1	0	1	1	0	1	0	0	0	1	0	1	0	0	0	1
23589	23589	0	0	1	23589	Gene_ID	H. sapiens	23589	H. sapiens	CARHSP1	calcium regulated heat stable protein 1	GO:0043488 regulation of mRNA stability;GO:0061013 regulation of mRNA catabolic process;GO:0043487 regulation of RNA stability							0	0	0	0	0	0	0	0	0	0	0	0	0	0	0	0	0	0	0	0	1
317772	317772	0	0	1	317772	Gene_ID	H. sapiens	317772	H. sapiens	H2AC21	H2A clustered histone 21	GO:0006342 chromatin silencing;GO:0045814 negative regulation of gene expression, epigenetic;GO:0045892 negative regulation of transcription, DNA-templated			Nucleus(Approved)				0	1	0	0	0	0	0	0	0	0	0	0	0	0	0	0	0	0	0	0	1
9284	101060393;9284	1	0	0	9284	Gene_ID	H. sapiens	9284	H. sapiens	NPIPA1	nuclear pore complex interacting protein family member A1	GO:0051028 mRNA transport;GO:0050658 RNA transport;GO:0050657 nucleic acid transport		Transporters/Transporter channels and pores	Nucleoplasm(Approved)				0	0	0	0	0	0	0	0	0	0	0	0	0	0	0	0	0	0	0	0	1
3273	3273	0	0	1	3273	Gene_ID	H. sapiens	3273	H. sapiens	HRG	histidine rich glycoprotein	GO:0051918 negative regulation of fibrinolysis;GO:2001027 negative regulation of endothelial cell chemotaxis;GO:0051838 cytolysis by host of symbiont cells			Nucleoli fibrillar center(Uncertain)		(M3468)NABA ECM REGULATORS; (M5885)NABA MATRISOME ASSOCIATED; (M5889)NABA MATRISOME	(M5946)HALLMARK COAGULATION; (M5934)HALLMARK XENOBIOTIC METABOLISM	1	0	1	1	0	1	0	1	0	0	1	0	1	0	0	1	1	0	0	0	1
727	727	0	0	1	727	Gene_ID	H. sapiens	727	H. sapiens	C5	complement C5	GO:0010760 negative regulation of macrophage chemotaxis;GO:0090197 positive regulation of chemokine secretion;GO:1905522 negative regulation of macrophage migration				Immune Globulin Human (Receptor binding);Eculizumab (Receptor binding)		(M5956)HALLMARK KRAS SIGNALING DN	0	1	1	1	0	1	0	0	0	0	0	1	0	0	0	0	1	0	0	0	1
5870	5870	0	1	0	5870	Gene_ID	H. sapiens	5870	H. sapiens	RAB6A	RAB6A, member RAS oncogene family	GO:0072385 minus-end-directed organelle transport along microtubule;GO:0018125 peptidyl-cysteine methylation;GO:0034498 early endosome to Golgi transport			Golgi apparatus(Approved)				1	1	0	0	1	0	0	0	0	0	0	0	0	0	0	0	0	0	0	0	1
28782	651536	0	0	1	28782	Gene_ID	H. sapiens	28782	H. sapiens	IGLV5-39	immunoglobulin lambda variable 5-39	GO:0002377 immunoglobulin production;GO:0002440 production of molecular mediator of immune response;GO:0002250 adaptive immune response							0	0	1	0	0	0	0	0	0	0	0	0	0	0	0	0	0	0	0	0	1
5355	5355	0	0	1	5355	Gene_ID	H. sapiens	5355	H. sapiens	PLP2	proteolipid protein 2	GO:0019221 cytokine-mediated signaling pathway;GO:0006935 chemotaxis;GO:0071345 cellular response to cytokine stimulus		Transporters/Transporter channels and pores					0	0	0	0	0	0	0	0	0	0	0	0	0	0	0	0	1	0	0	0	1
4900	4900	0	0	1	4900	Gene_ID	H. sapiens	4900	H. sapiens	NRGN	neurogranin	GO:1900273 positive regulation of long-term synaptic potentiation;GO:1900271 regulation of long-term synaptic potentiation;GO:0099170 postsynaptic modulation of chemical synaptic transmission							0	0	0	0	0	0	0	0	0	0	0	0	0	0	0	1	0	0	0	0	1
5004	5004	0	0	1	5004	Gene_ID	H. sapiens	5004	H. sapiens	ORM1	orosomucoid 1	GO:0050718 positive regulation of interleukin-1 beta secretion;GO:1904469 positive regulation of tumor necrosis factor secretion;GO:0050716 positive regulation of interleukin-1 secretion			Golgi apparatus;Vesicles(Approved)	Chlorpromazine;Oxycodone;Thalidomide		(M5905)HALLMARK ADIPOGENESIS	1	0	1	1	0	0	0	0	0	1	0	1	0	0	0	0	0	0	0	0	1
28988	28988	0	0	1	28988	Gene_ID	H. sapiens	28988	H. sapiens	DBNL	drebrin like	GO:0061003 positive regulation of dendritic spine morphogenesis;GO:0007257 activation of JUN kinase activity;GO:0045773 positive regulation of axon extension			Cytosol;Nucleoplasm(Supported)		(M190)PID TCR JNK PATHWAY; (M34)PID TCR PATHWAY		1	0	1	1	1	1	0	1	1	0	0	0	0	0	0	1	0	0	0	0	1
8676	8676	0	0	1	8676	Gene_ID	H. sapiens	8676	H. sapiens	STX11	syntaxin 11	GO:0031629 synaptic vesicle fusion to presynaptic active zone membrane;GO:0099500 vesicle fusion to plasma membrane;GO:0016079 synaptic vesicle exocytosis			Mitochondria(Supported)Nuclear bodies(Approved)				1	0	0	1	1	0	0	0	0	0	0	0	0	0	0	1	0	0	0	0	1
7276	7276	0	0	1	7276	Gene_ID	H. sapiens	7276	H. sapiens	TTR	transthyretin	GO:0042572 retinol metabolic process;GO:0070327 thyroid hormone transport;GO:0043312 neutrophil degranulation			Golgi apparatus(Approved)		(M106)PID HNF3B PATHWAY	(M5949)HALLMARK PEROXISOME; (M5948)HALLMARK BILE ACID METABOLISM	1	1	0	1	0	0	0	0	0	0	0	0	1	0	0	0	1	0	0	0	1
345	345	0	0	1	345	Gene_ID	H. sapiens	345	H. sapiens	APOC3	apolipoprotein C3	GO:0010903 negative regulation of very-low-density lipoprotein particle remodeling;GO:0060621 negative regulation of cholesterol import;GO:0010987 negative regulation of high-density lipoprotein particle clearance			Cell Junctions;Nucleoli;Nucleoplasm(Approved)			(M5946)HALLMARK COAGULATION	0	0	1	1	1	0	1	0	1	0	0	0	1	0	0	0	1	0	0	0	1
2787	2787	0	0	1	2787	Gene_ID	H. sapiens	2787	H. sapiens	GNG5	G protein subunit gamma 5	GO:0007186 G protein-coupled receptor signaling pathway;GO:0007165 signal transduction;GO:0023052 signaling		RAS pathway related proteins					0	1	0	1	0	1	0	0	0	0	0	0	0	0	0	0	1	0	0	0	1
1356	1356	0	1	0	1356	Gene_ID	H. sapiens	1356	H. sapiens	CP	ceruloplasmin	GO:0006879 cellular iron ion homeostasis;GO:0006825 copper ion transport;GO:0055072 iron ion homeostasis		Enzymes/ENZYME proteins/Oxidoreductases		Drotrecogin alfa (Ferroxidase activity)	(M255)PID HIF1 TFPATHWAY	(M5921)HALLMARK COMPLEMENT; (M5891)HALLMARK HYPOXIA	0	0	1	0	0	0	0	0	0	0	0	0	0	1	0	0	0	0	0	0	1
90316	90316	1	0	0	90316	Gene_ID	H. sapiens	90316	H. sapiens	TGIF2LX	TGFB induced factor homeobox 2 like X-linked	GO:0006357 regulation of transcription by RNA polymerase II;GO:0006366 transcription by RNA polymerase II;GO:0006355 regulation of transcription, DNA-templated		Transcription factors/Helix-turn-helix domains	Nucleoplasm(Approved)				0	0	0	0	0	0	0	0	0	0	0	0	0	0	0	0	0	0	0	0	1
1509	1509	0	0	1	1509	Gene_ID	H. sapiens	1509	H. sapiens	CTSD	cathepsin D	GO:0019886 antigen processing and presentation of exogenous peptide antigen via MHC class II;GO:0043280 positive regulation of cysteine-type endopeptidase activity involved in apoptotic process;GO:0042159 lipoprotein catabolic process		Enzymes/{ENZYME proteins/Hydrolases,Peptidases/Aspartic-type peptidases}		Insulin Human (Aspartic-type endopeptidase activity);Insulin Pork (Aspartic-type endopeptidase activity);S-Methylcysteine (Aspartic-type endopeptidase activity);1h-Benoximidazole-2-Carboxylic Acid (Aspartic-type endopeptidase activity);N-Aminoethylmorpholine (Aspartic-type endopeptidase activity);5-AMINO-6-CYCLOHEXYL-4-HYDROXY-2-ISOBUTYL-HEXANOIC ACID (Aspartic-type endopeptidase activity);CYCLOH…	(M87)PID LKB1 PATHWAY; (M144)PID CERAMIDE PATHWAY; (M200)PID ERA GENOMIC PATHWAY	(M5921)HALLMARK COMPLEMENT; (M5939)HALLMARK P53 PATHWAY	1	1	1	1	0	0	0	0	0	0	0	1	0	0	1	0	0	0	0	0	1
341208	341208	0	1	0	341208	Gene_ID	H. sapiens	341208	H. sapiens	HEPHL1	hephaestin like 1	GO:0006879 cellular iron ion homeostasis;GO:0006825 copper ion transport;GO:0055072 iron ion homeostasis							0	0	0	0	0	0	0	0	0	0	0	0	0	1	0	0	0	0	0	0	1
10109	10109	0	0	1	10109	Gene_ID	H. sapiens	10109	H. sapiens	ARPC2	actin related protein 2/3 complex subunit 2	GO:0034314 Arp2/3 complex-mediated actin nucleation;GO:0038096 Fc-gamma receptor signaling pathway involved in phagocytosis;GO:0010592 positive regulation of lamellipodium assembly			Cytosol;Golgi apparatus(Supported)	N-[2-(2-methyl-1H-indol-3-yl)ethyl]thiophene-2-carboxamide (Structural constituent of cytoskeleton);(2S)-2-(3-bromophenyl)-3-(5-chloro-2-hydroxyphenyl)-1,3-thiazolidin-4-one (Structural constituent of cytoskeleton)	(M278)PID RAC1 PATHWAY; (M81)PID CDC42 PATHWAY; (M164)PID ERBB1 DOWNSTREAM PATHWAY	(M5915)HALLMARK APICAL JUNCTION	0	1	0	1	1	1	0	1	0	0	0	0	0	0	0	1	0	1	0	0	1
55845	55845	0	0	1	55845	Gene_ID	H. sapiens	55845	H. sapiens	BRK1	BRICK1 subunit of SCAR/WAVE actin nucleating complex	GO:2000601 positive regulation of Arp2/3 complex-mediated actin nucleation;GO:0051127 positive regulation of actin nucleation;GO:0034315 regulation of Arp2/3 complex-mediated actin nucleation			Cell Junctions;Nuclear speckles(Approved)		(M278)PID RAC1 PATHWAY; (M164)PID ERBB1 DOWNSTREAM PATHWAY; (M186)PID PDGFRB PATHWAY		0	1	0	0	1	1	0	1	0	0	0	0	0	0	0	1	0	1	0	0	1
7430	7430	0	0	1	7430	Gene_ID	H. sapiens	7430	H. sapiens	EZR	ezrin	GO:1900041 negative regulation of interleukin-2 secretion;GO:0050860 negative regulation of T cell receptor signaling pathway;GO:0001951 intestinal D-glucose absorption			Plasma membrane(Enhanced)		(M240)PID SYNDECAN 2 PATHWAY; (M94)PID FAS PATHWAY; (M12)PID RHOA PATHWAY	(M5893)HALLMARK MITOTIC SPINDLE	0	0	0	1	1	1	1	1	1	0	0	1	0	0	0	1	1	0	0	0	1
440822	440822	1	0	0	440822	Gene_ID	H. sapiens	440822	H. sapiens	PIWIL3	piwi like RNA-mediated gene silencing 3	GO:0007283 spermatogenesis;GO:0031047 gene silencing by RNA;GO:0048232 male gamete generation							0	0	0	0	0	0	0	0	0	0	0	0	0	0	0	0	0	0	0	0	1
11021	11021	0	0	1	11021	Gene_ID	H. sapiens	11021	H. sapiens	RAB35	RAB35, member RAS oncogene family	GO:0048227 plasma membrane to endosome transport;GO:0036010 protein localization to endosome;GO:1990090 cellular response to nerve growth factor stimulus							0	0	0	0	1	0	0	0	0	0	0	0	0	0	0	0	0	0	0	0	1
3012	3012	0	0	1	3012	Gene_ID	H. sapiens	3012	H. sapiens	H2AC8	H2A clustered histone 8	GO:0006342 chromatin silencing;GO:0045814 negative regulation of gene expression, epigenetic;GO:0045892 negative regulation of transcription, DNA-templated			Nucleoplasm(Supported)				0	1	0	0	0	0	0	0	0	0	0	0	0	0	0	0	0	0	0	0	1
7178	7178	0	0	1	7178	Gene_ID	H. sapiens	7178	H. sapiens	TPT1	tumor protein, translationally-controlled 1	GO:1902230 negative regulation of intrinsic apoptotic signaling pathway in response to DNA damage;GO:1902229 regulation of intrinsic apoptotic signaling pathway in response to DNA damage;GO:2001243 negative regulation of intrinsic apoptotic signaling pathway			Cytosol(Supported)		(M129)PID PLK1 PATHWAY		0	0	0	0	0	0	0	0	0	0	0	0	0	0	0	0	0	0	0	0	1
100288332	100288332	1	0	0	100288332	Gene_ID	H. sapiens	100288332	H. sapiens	NPIPA5	nuclear pore complex interacting protein family member A5				Nucleoplasm(Approved)				0	0	0	0	0	0	0	0	0	0	0	0	0	0	0	0	0	0	0	0	1
4831	4831	0	1	0	4831	Gene_ID	H. sapiens	4831	H. sapiens	NME2	NME/NM23 nucleoside diphosphate kinase 2	GO:0006183 GTP biosynthetic process;GO:0018106 peptidyl-histidine phosphorylation;GO:0006228 UTP biosynthetic process		Enzymes/ENZYME proteins/Transferases		Guanosine-5'-Diphosphate (Transcription factor activity, sequence-specific dna binding)	(M66)PID MYC ACTIV PATHWAY		1	0	0	0	0	0	0	1	0	0	0	0	0	0	0	0	0	0	0	1	1
8349	8349	0	1	0	8349	Gene_ID	H. sapiens	8349	H. sapiens	H2BC21	H2B clustered histone 21	GO:0002227 innate immune response in mucosa;GO:0019731 antibacterial humoral response;GO:0002385 mucosal immune response			Cytosol;Nucleoplasm(Approved)				0	1	1	0	0	0	0	0	0	0	1	0	0	0	0	0	0	0	0	0	1
70	70	0	1	0	70	Gene_ID	H. sapiens	70	H. sapiens	ACTC1	actin alpha cardiac muscle 1	GO:0030240 skeletal muscle thin filament assembly;GO:0090131 mesenchyme migration;GO:0055003 cardiac myofibril assembly						(M5956)HALLMARK KRAS SIGNALING DN; (M5909)HALLMARK MYOGENESIS; (M5915)HALLMARK APICAL JUNCTION	0	0	0	0	0	1	0	0	0	0	0	0	0	0	0	0	0	0	1	0	1
51015	51015	0	0	1	51015	Gene_ID	H. sapiens	51015	H. sapiens	ISOC1	isochorismatase domain containing 1	GO:0008150 biological_process			Endoplasmic reticulum;Vesicles(Approved)			(M5949)HALLMARK PEROXISOME; (M5948)HALLMARK BILE ACID METABOLISM; (M5913)HALLMARK INTERFERON GAMMA RESPONSE	0	0	0	0	0	0	0	0	0	0	0	0	0	0	0	0	0	0	0	0	1
7408	7408	0	0	1	7408	Gene_ID	H. sapiens	7408	H. sapiens	VASP	vasodilator stimulated phosphoprotein	GO:0001843 neural tube closure;GO:0014020 primary neural tube formation;GO:0030838 positive regulation of actin filament polymerization			Cell Junctions;Focal adhesion sites;Plasma membrane(Supported)		(M184)PID ECADHERIN KERATINOCYTE PATHWAY; (M210)PID IL8 CXCR2 PATHWAY; (M16801)SIG REGULATION OF THE ACTIN CYTOSKELETON BY RHO GTPASES	(M5915)HALLMARK APICAL JUNCTION	0	0	0	1	0	1	0	1	0	0	0	0	0	0	0	0	1	0	0	1	1
3240	3240	0	0	1	3240	Gene_ID	H. sapiens	3240	H. sapiens	HP	haptoglobin	GO:2000296 negative regulation of hydrogen peroxide catabolic process;GO:2000295 regulation of hydrogen peroxide catabolic process;GO:0010727 negative regulation of hydrogen peroxide metabolic process		Enzymes/Peptidases/Serine-type peptidases	Vesicles(Approved)				1	0	1	0	1	0	0	0	1	1	1	0	0	0	0	0	0	0	0	0	1
654364	654364	0	0	1	654364	Gene_ID	H. sapiens	654364	H. sapiens	NME1-NME2	NME1-NME2 readthrough				Cytosol(Enhanced)				1	0	0	0	0	0	0	0	0	0	0	0	0	0	0	0	0	0	0	0	1
55276	55276	0	0	1	55276	Gene_ID	H. sapiens	55276	H. sapiens	PGM2	phosphoglucomutase 2	GO:0006098 pentose-phosphate shunt;GO:0005980 glycogen catabolic process;GO:0019388 galactose catabolic process		Enzymes/ENZYME proteins/Isomerase	Intermediate filaments(Approved)			(M5937)HALLMARK GLYCOLYSIS; (M5891)HALLMARK HYPOXIA	1	0	0	0	0	0	0	0	0	0	0	0	0	0	0	0	0	0	0	0	1
79180	79180	0	0	1	79180	Gene_ID	H. sapiens	79180	H. sapiens	EFHD2	EF-hand domain family member D2				Cytosol(Approved)				0	0	0	0	0	0	0	0	0	0	0	0	0	0	0	0	0	0	0	0	1

## Sheet: Enrichment
GroupID	Category	Term	Description	LogP	Log(q-value)	InTerm_InList	Genes	Symbols
1_Summary	GO Biological Processes	GO:0045055	regulated exocytosis	-16.0728	-11.7537	27/796	2,308,718,1191,1509,2243,2244,3107,3240,3273,3700,4831,5004,5265,5341,5870,5879,5908,6280,7276,8676,9230,10890,28988,51411,51552,55276,654364,6352,3133	A2M,ANXA5,C3,CLU,CTSD,FGA,FGB,HLA-C,HP,HRG,ITIH4,NME2,ORM1,SERPINA1,PLEK,RAB6A,RAC1,RAP1B,S100A9,TTR,STX11,RAB11B,RAB10,DBNL,BIN2,RAB14,PGM2,NME1-NME2,CCL5,HLA-E
1_Member	GO Biological Processes	GO:0045055	regulated exocytosis	-16.0728	-11.7537	27/796	2,308,718,1191,1509,2243,2244,3107,3240,3273,3700,4831,5004,5265,5341,5870,5879,5908,6280,7276,8676,9230,10890,28988,51411,51552,55276	A2M,ANXA5,C3,CLU,CTSD,FGA,FGB,HLA-C,HP,HRG,ITIH4,NME2,ORM1,SERPINA1,PLEK,RAB6A,RAC1,RAP1B,S100A9,TTR,STX11,RAB11B,RAB10,DBNL,BIN2,RAB14,PGM2
1_Member	Reactome Gene Sets	R-HSA-6798695	Neutrophil degranulation	-11.4022	-7.68516	18/480	718,1509,3107,3240,4831,5004,5265,5870,5879,5908,6280,7276,10890,28988,51411,51552,55276,654364	C3,CTSD,HLA-C,HP,NME2,ORM1,SERPINA1,RAB6A,RAC1,RAP1B,S100A9,TTR,RAB10,DBNL,BIN2,RAB14,PGM2,NME1-NME2
1_Member	GO Biological Processes	GO:0042119	neutrophil activation	-11.094	-7.49689	18/501	718,1509,3107,3240,4831,5004,5265,5870,5879,5908,6280,6352,7276,10890,28988,51411,51552,55276	C3,CTSD,HLA-C,HP,NME2,ORM1,SERPINA1,RAB6A,RAC1,RAP1B,S100A9,CCL5,TTR,RAB10,DBNL,BIN2,RAB14,PGM2
1_Member	GO Biological Processes	GO:0036230	granulocyte activation	-11.0086	-7.49689	18/507	718,1509,3107,3240,4831,5004,5265,5870,5879,5908,6280,6352,7276,10890,28988,51411,51552,55276	C3,CTSD,HLA-C,HP,NME2,ORM1,SERPINA1,RAB6A,RAC1,RAP1B,S100A9,CCL5,TTR,RAB10,DBNL,BIN2,RAB14,PGM2
1_Member	GO Biological Processes	GO:0002444	myeloid leukocyte mediated immunity	-10.364	-7.12939	18/555	718,1509,3107,3133,3240,4831,5004,5265,5870,5879,5908,6280,7276,10890,28988,51411,51552,55276	C3,CTSD,HLA-C,HLA-E,HP,NME2,ORM1,SERPINA1,RAB6A,RAC1,RAP1B,S100A9,TTR,RAB10,DBNL,BIN2,RAB14,PGM2
1_Member	GO Biological Processes	GO:0043312	neutrophil degranulation	-10.2804	-7.12403	17/488	718,1509,3107,3240,4831,5004,5265,5870,5879,5908,6280,7276,10890,28988,51411,51552,55276	C3,CTSD,HLA-C,HP,NME2,ORM1,SERPINA1,RAB6A,RAC1,RAP1B,S100A9,TTR,RAB10,DBNL,BIN2,RAB14,PGM2
1_Member	GO Biological Processes	GO:0002283	neutrophil activation involved in immune response	-10.239	-7.12403	17/491	718,1509,3107,3240,4831,5004,5265,5870,5879,5908,6280,7276,10890,28988,51411,51552,55276	C3,CTSD,HLA-C,HP,NME2,ORM1,SERPINA1,RAB6A,RAC1,RAP1B,S100A9,TTR,RAB10,DBNL,BIN2,RAB14,PGM2
1_Member	GO Biological Processes	GO:0002274	myeloid leukocyte activation	-10.0915	-7.07178	19/656	718,1191,1509,3107,3240,4831,5004,5265,5870,5879,5908,6280,6352,7276,10890,28988,51411,51552,55276	C3,CLU,CTSD,HLA-C,HP,NME2,ORM1,SERPINA1,RAB6A,RAC1,RAP1B,S100A9,CCL5,TTR,RAB10,DBNL,BIN2,RAB14,PGM2
1_Member	GO Biological Processes	GO:0002446	neutrophil mediated immunity	-10.0899	-7.07178	17/502	718,1509,3107,3240,4831,5004,5265,5870,5879,5908,6280,7276,10890,28988,51411,51552,55276	C3,CTSD,HLA-C,HP,NME2,ORM1,SERPINA1,RAB6A,RAC1,RAP1B,S100A9,TTR,RAB10,DBNL,BIN2,RAB14,PGM2
1_Member	GO Biological Processes	GO:0043299	leukocyte degranulation	-9.6389	-6.66222	17/537	718,1509,3107,3240,4831,5004,5265,5870,5879,5908,6280,7276,10890,28988,51411,51552,55276	C3,CTSD,HLA-C,HP,NME2,ORM1,SERPINA1,RAB6A,RAC1,RAP1B,S100A9,TTR,RAB10,DBNL,BIN2,RAB14,PGM2
1_Member	GO Biological Processes	GO:0002275	myeloid cell activation involved in immune response	-9.5162	-6.59503	17/547	718,1509,3107,3240,4831,5004,5265,5870,5879,5908,6280,7276,10890,28988,51411,51552,55276	C3,CTSD,HLA-C,HP,NME2,ORM1,SERPINA1,RAB6A,RAC1,RAP1B,S100A9,TTR,RAB10,DBNL,BIN2,RAB14,PGM2
1_Member	GO Biological Processes	GO:0002366	leukocyte activation involved in immune response	-7.8108	-5.09376	17/711	718,1509,3107,3240,4831,5004,5265,5870,5879,5908,6280,7276,10890,28988,51411,51552,55276	C3,CTSD,HLA-C,HP,NME2,ORM1,SERPINA1,RAB6A,RAC1,RAP1B,S100A9,TTR,RAB10,DBNL,BIN2,RAB14,PGM2
1_Member	GO Biological Processes	GO:0002263	cell activation involved in immune response	-7.77517	-5.06884	17/715	718,1509,3107,3240,4831,5004,5265,5870,5879,5908,6280,7276,10890,28988,51411,51552,55276	C3,CTSD,HLA-C,HP,NME2,ORM1,SERPINA1,RAB6A,RAC1,RAP1B,S100A9,TTR,RAB10,DBNL,BIN2,RAB14,PGM2
2_Summary	KEGG Pathway	hsa05322	Systemic lupus erythematosus	-12.1226	-8.1045	12/133	718,720,721,727,3012,3015,3018,8335,8349,85236,92815,317772,325,2243,6288,7276,2787,2791,5879,6280,10094,10109,22919,55845,3008,344,348,1509,2,5870,81876,1465,6201,54205,4218,7332	C3,C4A,C4B,C5,H2AC8,H2AZ1,H2BC3,H2AC4,H2BC21,H2BC12,H2AW,H2AC21,APCS,FGA,SAA1,TTR,GNG5,GNG11,RAC1,S100A9,ARPC3,ARPC2,MAPRE1,BRK1,H1-4,APOC2,APOE,CTSD,A2M,RAB6A,RAB1B,CSRP1,RPS7,CYCS,RAB8A,UBE2L3
2_Member	KEGG Pathway	hsa05322	Systemic lupus erythematosus	-12.1226	-8.1045	12/133	718,720,721,727,3012,3015,3018,8335,8349,85236,92815,317772	C3,C4A,C4B,C5,H2AC8,H2AZ1,H2BC3,H2AC4,H2BC21,H2BC12,H2AW,H2AC21
2_Member	Reactome Gene Sets	R-HSA-977225	Amyloid fiber formation	-10.2473	-7.12403	10/109	325,2243,3012,3015,3018,6288,7276,8335,8349,85236	APCS,FGA,H2AC8,H2AZ1,H2BC3,SAA1,TTR,H2AC4,H2BC21,H2BC12
2_Member	KEGG Pathway	hsa05034	Alcoholism	-8.10774	-5.34494	10/180	2787,2791,3012,3015,3018,8335,8349,85236,92815,317772	GNG5,GNG11,H2AC8,H2AZ1,H2BC3,H2AC4,H2BC21,H2BC12,H2AW,H2AC21
2_Member	Reactome Gene Sets	R-HSA-195258	RHO GTPase Effectors	-7.60903	-4.94314	12/327	3012,3015,3018,5879,6280,8335,8349,10094,10109,22919,55845,85236	H2AC8,H2AZ1,H2BC3,RAC1,S100A9,H2AC4,H2BC21,ARPC3,ARPC2,MAPRE1,BRK1,H2BC12
2_Member	Reactome Gene Sets	R-HSA-2559586	DNA Damage/Telomere Stress Induced Senescence	-7.17262	-4.57867	7/80	3008,3012,3015,3018,8335,8349,85236	H1-4,H2AC8,H2AZ1,H2BC3,H2AC4,H2BC21,H2BC12
2_Member	Reactome Gene Sets	R-HSA-9006931	Signaling by Nuclear Receptors	-7.08331	-4.32062	10/299	344,348,1509,2787,2791,3012,3015,3018,8335,85236	APOC2,APOE,CTSD,GNG5,GNG11,H2AC8,H2AZ1,H2BC3,H2AC4,H2BC12
2_Member	Reactome Gene Sets	R-HSA-171306	Packaging Of Telomere Ends	-6.94439	-4.41085	6/52	3012,3015,3018,8335,8349,85236	H2AC8,H2AZ1,H2BC3,H2AC4,H2BC21,H2BC12
2_Member	Reactome Gene Sets	R-HSA-194315	Signaling by Rho GTPases	-6.93368	-4.41085	13/455	2,3012,3015,3018,5879,6280,8335,8349,10094,10109,22919,55845,85236	A2M,H2AC8,H2AZ1,H2BC3,RAC1,S100A9,H2AC4,H2BC21,ARPC3,ARPC2,MAPRE1,BRK1,H2BC12
2_Member	Reactome Gene Sets	R-HSA-110330	Recognition and association of DNA glycosylase with site containing an affected purine	-6.74791	-4.26131	6/56	3012,3015,3018,8335,8349,85236	H2AC8,H2AZ1,H2BC3,H2AC4,H2BC21,H2BC12
2_Member	Reactome Gene Sets	R-HSA-110331	Cleavage of the damaged purine	-6.74791	-4.26131	6/56	3012,3015,3018,8335,8349,85236	H2AC8,H2AZ1,H2BC3,H2AC4,H2BC21,H2BC12
2_Member	Reactome Gene Sets	R-HSA-73927	Depurination	-6.74791	-4.26131	6/56	3012,3015,3018,8335,8349,85236	H2AC8,H2AZ1,H2BC3,H2AC4,H2BC21,H2BC12
2_Member	Reactome Gene Sets	R-HSA-3214815	HDACs deacetylate histones	-6.68653	-4.21252	7/94	3012,3018,8335,8349,85236,92815,317772	H2AC8,H2BC3,H2AC4,H2BC21,H2BC12,H2AW,H2AC21
2_Member	Reactome Gene Sets	R-HSA-5625740	RHO GTPases activate PKNs	-6.65487	-4.19309	7/95	3012,3015,3018,5879,8335,8349,85236	H2AC8,H2AZ1,H2BC3,RAC1,H2AC4,H2BC21,H2BC12
2_Member	Reactome Gene Sets	R-HSA-110328	Recognition and association of DNA glycosylase with site containing an affected pyrimidine	-6.52267	-4.09005	6/61	3012,3015,3018,8335,8349,85236	H2AC8,H2AZ1,H2BC3,H2AC4,H2BC21,H2BC12
2_Member	Reactome Gene Sets	R-HSA-110329	Cleavage of the damaged pyrimidine	-6.52267	-4.09005	6/61	3012,3015,3018,8335,8349,85236	H2AC8,H2AZ1,H2BC3,H2AC4,H2BC21,H2BC12
2_Member	Reactome Gene Sets	R-HSA-73928	Depyrimidination	-6.52267	-4.09005	6/61	3012,3015,3018,8335,8349,85236	H2AC8,H2AZ1,H2BC3,H2AC4,H2BC21,H2BC12
2_Member	Reactome Gene Sets	R-HSA-73728	RNA Polymerase I Promoter Opening	-6.43811	-4.01663	6/63	3012,3015,3018,8335,8349,85236	H2AC8,H2AZ1,H2BC3,H2AC4,H2BC21,H2BC12
2_Member	Reactome Gene Sets	R-HSA-73929	Base-Excision Repair, AP Site Formation	-6.43811	-4.01663	6/63	3012,3015,3018,8335,8349,85236	H2AC8,H2AZ1,H2BC3,H2AC4,H2BC21,H2BC12
2_Member	Reactome Gene Sets	R-HSA-5334118	DNA methylation	-6.35641	-3.95112	6/65	3012,3015,3018,8335,8349,85236	H2AC8,H2AZ1,H2BC3,H2AC4,H2BC21,H2BC12
2_Member	Reactome Gene Sets	R-HSA-5625886	Activated PKN1 stimulates transcription of AR (androgen receptor) regulated genes KLK2 and KLK3	-6.27739	-3.88368	6/67	3012,3015,3018,8335,8349,85236	H2AC8,H2AZ1,H2BC3,H2AC4,H2BC21,H2BC12
2_Member	Reactome Gene Sets	R-HSA-1912422	Pre-NOTCH Expression and Processing	-6.24611	-3.8615	7/109	3012,3015,3018,5870,8335,8349,85236	H2AC8,H2AZ1,H2BC3,RAB6A,H2AC4,H2BC21,H2BC12
2_Member	Reactome Gene Sets	R-HSA-427359	SIRT1 negatively regulates rRNA expression	-6.23883	-3.85925	6/68	3012,3015,3018,8335,8349,85236	H2AC8,H2AZ1,H2BC3,H2AC4,H2BC21,H2BC12
2_Member	Reactome Gene Sets	R-HSA-8939211	ESR-mediated signaling	-6.16505	-3.80498	9/223	1509,2787,2791,3012,3015,3018,8335,8349,85236	CTSD,GNG5,GNG11,H2AC8,H2AZ1,H2BC3,H2AC4,H2BC21,H2BC12
2_Member	Reactome Gene Sets	R-HSA-212300	PRC2 methylates histones and DNA	-6.05481	-3.69949	6/73	3012,3015,3018,8335,8349,85236	H2AC8,H2AZ1,H2BC3,H2AC4,H2BC21,H2BC12
2_Member	Reactome Gene Sets	R-HSA-2299718	Condensation of Prophase Chromosomes	-6.01964	-3.67826	6/74	3012,3015,3018,8335,8349,85236	H2AC8,H2AZ1,H2BC3,H2AC4,H2BC21,H2BC12
2_Member	Reactome Gene Sets	R-HSA-606279	Deposition of new CENPA-containing nucleosomes at the centromere	-6.01964	-3.67826	6/74	3012,3015,3018,8335,8349,85236	H2AC8,H2AZ1,H2BC3,H2AC4,H2BC21,H2BC12
2_Member	Reactome Gene Sets	R-HSA-774815	Nucleosome assembly	-6.01964	-3.67826	6/74	3012,3015,3018,8335,8349,85236	H2AC8,H2AZ1,H2BC3,H2AC4,H2BC21,H2BC12
2_Member	Reactome Gene Sets	R-HSA-427389	ERCC6 (CSB) and EHMT2 (G9a) positively regulate rRNA expression	-5.91716	-3.59805	6/77	3012,3015,3018,8335,8349,85236	H2AC8,H2AZ1,H2BC3,H2AC4,H2BC21,H2BC12
2_Member	Reactome Gene Sets	R-HSA-1221632	Meiotic synapsis	-5.8512	-3.54587	6/79	3012,3015,3018,8335,8349,85236	H2AC8,H2AZ1,H2BC3,H2AC4,H2BC21,H2BC12
2_Member	Reactome Gene Sets	R-HSA-912446	Meiotic recombination	-5.63384	-3.37544	6/86	3012,3015,3018,8335,8349,85236	H2AC8,H2AZ1,H2BC3,H2AC4,H2BC21,H2BC12
2_Member	Reactome Gene Sets	R-HSA-157579	Telomere Maintenance	-5.51809	-3.27817	6/90	3012,3015,3018,8335,8349,85236	H2AC8,H2AZ1,H2BC3,H2AC4,H2BC21,H2BC12
2_Member	Reactome Gene Sets	R-HSA-9616222	Transcriptional regulation of granulopoiesis	-5.51809	-3.27817	6/90	3012,3015,3018,8335,8349,85236	H2AC8,H2AZ1,H2BC3,H2AC4,H2BC21,H2BC12
2_Member	Reactome Gene Sets	R-HSA-201722	Formation of the beta-catenin:TCF transactivating complex	-5.49002	-3.26434	6/91	3012,3015,3018,8335,8349,85236	H2AC8,H2AZ1,H2BC3,H2AC4,H2BC21,H2BC12
2_Member	Reactome Gene Sets	R-HSA-5250924	B-WICH complex positively regulates rRNA expression	-5.49002	-3.26434	6/91	3012,3015,3018,8335,8349,85236	H2AC8,H2AZ1,H2BC3,H2AC4,H2BC21,H2BC12
2_Member	Reactome Gene Sets	R-HSA-73772	RNA Polymerase I Promoter Escape	-5.49002	-3.26434	6/91	3012,3015,3018,8335,8349,85236	H2AC8,H2AZ1,H2BC3,H2AC4,H2BC21,H2BC12
2_Member	Reactome Gene Sets	R-HSA-3214847	HATs acetylate histones	-5.47386	-3.25856	7/142	3012,3018,8335,8349,85236,92815,317772	H2AC8,H2BC3,H2AC4,H2BC21,H2BC12,H2AW,H2AC21
2_Member	Reactome Gene Sets	R-HSA-68875	Mitotic Prophase	-5.47386	-3.25856	7/142	3012,3015,3018,8335,8349,81876,85236	H2AC8,H2AZ1,H2BC3,H2AC4,H2BC21,RAB1B,H2BC12
2_Member	Reactome Gene Sets	R-HSA-73884	Base Excision Repair	-5.46229	-3.25039	6/92	3012,3015,3018,8335,8349,85236	H2AC8,H2AZ1,H2BC3,H2AC4,H2BC21,H2BC12
2_Member	Reactome Gene Sets	R-HSA-1912408	Pre-NOTCH Transcription and Translation	-5.43488	-3.22637	6/93	3012,3015,3018,8335,8349,85236	H2AC8,H2AZ1,H2BC3,H2AC4,H2BC21,H2BC12
2_Member	Reactome Gene Sets	R-HSA-8936459	RUNX1 regulates genes involved in megakaryocyte differentiation and platelet function	-5.32837	-3.13959	6/97	3012,3015,3018,8335,8349,85236	H2AC8,H2AZ1,H2BC3,H2AC4,H2BC21,H2BC12
2_Member	Reactome Gene Sets	R-HSA-9018519	Estrogen-dependent gene expression	-5.3163	-3.13391	7/150	1509,3012,3015,3018,8335,8349,85236	CTSD,H2AC8,H2AZ1,H2BC3,H2AC4,H2BC21,H2BC12
2_Member	Reactome Gene Sets	R-HSA-5578749	Transcriptional regulation by small RNAs	-5.10524	-2.97366	6/106	3012,3015,3018,8335,8349,85236	H2AC8,H2AZ1,H2BC3,H2AC4,H2BC21,H2BC12
2_Member	Reactome Gene Sets	R-HSA-5689901	Metalloprotease DUBs	-5.09926	-2.90067	4/37	3012,8335,92815,317772	H2AC8,H2AC4,H2AW,H2AC21
2_Member	Reactome Gene Sets	R-HSA-3214858	RMTs methylate histone arginines	-5.099	-2.90067	5/79	3012,3015,8335,92815,317772	H2AC8,H2AZ1,H2AC4,H2AW,H2AC21
2_Member	Reactome Gene Sets	R-HSA-5250913	Positive epigenetic regulation of rRNA expression	-5.08173	-2.95853	6/107	3012,3015,3018,8335,8349,85236	H2AC8,H2AZ1,H2BC3,H2AC4,H2BC21,H2BC12
2_Member	Reactome Gene Sets	R-HSA-427413	NoRC negatively regulates rRNA expression	-5.03543	-2.91498	6/109	3012,3015,3018,8335,8349,85236	H2AC8,H2AZ1,H2BC3,H2AC4,H2BC21,H2BC12
2_Member	GO Biological Processes	GO:0006342	chromatin silencing	-5.02388	-2.84149	6/141	3008,3012,3015,8335,92815,317772	H1-4,H2AC8,H2AZ1,H2AC4,H2AW,H2AC21
2_Member	Reactome Gene Sets	R-HSA-2559582	Senescence-Associated Secretory Phenotype (SASP)	-4.99005	-2.89366	6/111	3012,3015,3018,8335,8349,85236	H2AC8,H2AZ1,H2BC3,H2AC4,H2BC21,H2BC12
2_Member	Reactome Gene Sets	R-HSA-73854	RNA Polymerase I Promoter Clearance	-4.99005	-2.89366	6/111	3012,3015,3018,8335,8349,85236	H2AC8,H2AZ1,H2BC3,H2AC4,H2BC21,H2BC12
2_Member	Reactome Gene Sets	R-HSA-5250941	Negative epigenetic regulation of rRNA expression	-4.96769	-2.87389	6/112	3012,3015,3018,8335,8349,85236	H2AC8,H2AZ1,H2BC3,H2AC4,H2BC21,H2BC12
2_Member	Reactome Gene Sets	R-HSA-73864	RNA Polymerase I Transcription	-4.92362	-2.8324	6/114	3012,3015,3018,8335,8349,85236	H2AC8,H2AZ1,H2BC3,H2AC4,H2BC21,H2BC12
2_Member	Reactome Gene Sets	R-HSA-1500620	Meiosis	-4.83797	-2.76438	6/118	3012,3015,3018,8335,8349,85236	H2AC8,H2AZ1,H2BC3,H2AC4,H2BC21,H2BC12
2_Member	Reactome Gene Sets	R-HSA-73886	Chromosome Maintenance	-4.83797	-2.76438	6/118	3012,3015,3018,8335,8349,85236	H2AC8,H2AZ1,H2BC3,H2AC4,H2BC21,H2BC12
2_Member	GO Biological Processes	GO:0045814	negative regulation of gene expression, epigenetic	-4.78958	-2.6773	6/155	3008,3012,3015,8335,92815,317772	H1-4,H2AC8,H2AZ1,H2AC4,H2AW,H2AC21
2_Member	Reactome Gene Sets	R-HSA-5617472	Activation of anterior HOX genes in hindbrain development during early embryogenesis	-4.7758	-2.71438	6/121	3012,3015,3018,8335,8349,85236	H2AC8,H2AZ1,H2BC3,H2AC4,H2BC21,H2BC12
2_Member	Reactome Gene Sets	R-HSA-5619507	Activation of HOX genes during differentiation	-4.7758	-2.71438	6/121	3012,3015,3018,8335,8349,85236	H2AC8,H2AZ1,H2BC3,H2AC4,H2BC21,H2BC12
2_Member	Reactome Gene Sets	R-HSA-195721	Signaling by WNT	-4.75935	-2.70506	9/332	2787,2791,3012,3015,3018,5879,8335,8349,85236	GNG5,GNG11,H2AC8,H2AZ1,H2BC3,RAC1,H2AC4,H2BC21,H2BC12
2_Member	Reactome Gene Sets	R-HSA-2559580	Oxidative Stress Induced Senescence	-4.65639	-2.62509	6/127	3012,3015,3018,8335,8349,85236	H2AC8,H2AZ1,H2BC3,H2AC4,H2BC21,H2BC12
2_Member	Reactome Gene Sets	R-HSA-8939236	RUNX1 regulates transcription of genes involved in differentiation of HSCs	-4.599	-2.58092	6/130	3012,3015,3018,8335,8349,85236	H2AC8,H2AZ1,H2BC3,H2AC4,H2BC21,H2BC12
2_Member	Reactome Gene Sets	R-HSA-2559583	Cellular Senescence	-4.5326	-2.52736	7/198	3008,3012,3015,3018,8335,8349,85236	H1-4,H2AC8,H2AZ1,H2BC3,H2AC4,H2BC21,H2BC12
2_Member	Reactome Gene Sets	R-HSA-3247509	Chromatin modifying enzymes	-4.51179	-2.5149	8/274	3012,3015,3018,8335,8349,85236,92815,317772	H2AC8,H2AZ1,H2BC3,H2AC4,H2BC21,H2BC12,H2AW,H2AC21
2_Member	Reactome Gene Sets	R-HSA-4839726	Chromatin organization	-4.51179	-2.5149	8/274	3012,3015,3018,8335,8349,85236,92815,317772	H2AC8,H2AZ1,H2BC3,H2AC4,H2BC21,H2BC12,H2AW,H2AC21
2_Member	Reactome Gene Sets	R-HSA-211000	Gene Silencing by RNA	-4.48847	-2.49849	6/136	3012,3015,3018,8335,8349,85236	H2AC8,H2AZ1,H2BC3,H2AC4,H2BC21,H2BC12
2_Member	Reactome Gene Sets	R-HSA-9610379	HCMV Late Events	-4.44988	-2.46321	7/204	3012,3018,8335,8349,85236,92815,317772	H2AC8,H2BC3,H2AC4,H2BC21,H2BC12,H2AW,H2AC21
2_Member	Reactome Gene Sets	R-HSA-1474165	Reproduction	-4.36614	-2.39534	6/143	3012,3015,3018,8335,8349,85236	H2AC8,H2AZ1,H2BC3,H2AC4,H2BC21,H2BC12
2_Member	Reactome Gene Sets	R-HSA-5689880	Ub-specific processing proteases	-4.24213	-2.2941	7/220	3012,3018,8335,8349,85236,92815,317772	H2AC8,H2BC3,H2AC4,H2BC21,H2BC12,H2AW,H2AC21
2_Member	Reactome Gene Sets	R-HSA-212165	Epigenetic regulation of gene expression	-4.23424	-2.28804	6/151	3012,3015,3018,8335,8349,85236	H2AC8,H2AZ1,H2BC3,H2AC4,H2BC21,H2BC12
2_Member	Reactome Gene Sets	R-HSA-9609690	HCMV Early Events	-4.06246	-2.14303	7/235	3012,3018,8335,8349,85236,92815,317772	H2AC8,H2BC3,H2AC4,H2BC21,H2BC12,H2AW,H2AC21
2_Member	Reactome Gene Sets	R-HSA-157118	Signaling by NOTCH	-4.05095	-2.13325	7/236	3012,3015,3018,5870,8335,8349,85236	H2AC8,H2AZ1,H2BC3,RAB6A,H2AC4,H2BC21,H2BC12
2_Member	Reactome Gene Sets	R-HSA-8953897	Cellular responses to external stimuli	-3.65627	-1.77965	9/599	1465,3008,3012,3015,3018,6201,8335,54205,85236	CSRP1,H1-4,H2AC8,H2AZ1,H2BC3,RPS7,H2AC4,CYCS,H2BC12
2_Member	Reactome Gene Sets	R-HSA-9609646	HCMV Infection	-3.50187	-1.6523	7/290	3012,3018,8335,8349,85236,92815,317772	H2AC8,H2BC3,H2AC4,H2BC21,H2BC12,H2AW,H2AC21
2_Member	Reactome Gene Sets	R-HSA-5688426	Deubiquitination	-3.43957	-1.59903	7/297	3012,3018,8335,8349,85236,92815,317772	H2AC8,H2BC3,H2AC4,H2BC21,H2BC12,H2AW,H2AC21
2_Member	Reactome Gene Sets	R-HSA-5689603	UCH proteinases	-3.36463	-1.56272	4/102	3012,8335,92815,317772	H2AC8,H2AC4,H2AW,H2AC21
2_Member	Reactome Gene Sets	R-HSA-68886	M Phase	-3.26313	-1.43957	8/417	3012,3015,3018,8335,8349,22919,81876,85236	H2AC8,H2AZ1,H2BC3,H2AC4,H2BC21,MAPRE1,RAB1B,H2BC12
2_Member	Reactome Gene Sets	R-HSA-201681	TCF dependent signaling in response to WNT	-3.21543	-1.4021	6/233	3012,3015,3018,8335,8349,85236	H2AC8,H2AZ1,H2BC3,H2AC4,H2BC21,H2BC12
2_Member	Reactome Gene Sets	R-HSA-8878171	Transcriptional regulation by RUNX1	-3.15773	-1.36217	6/239	3012,3015,3018,8335,8349,85236	H2AC8,H2AZ1,H2BC3,H2AC4,H2BC21,H2BC12
2_Member	Reactome Gene Sets	R-HSA-69278	Cell Cycle, Mitotic	-3.05836	-1.27664	9/560	3012,3015,3018,4218,8335,8349,22919,81876,85236	H2AC8,H2AZ1,H2BC3,RAB8A,H2AC4,H2BC21,MAPRE1,RAB1B,H2BC12
2_Member	Reactome Gene Sets	R-HSA-2262752	Cellular responses to stress	-3.03363	-1.31015	8/585	3008,3012,3015,3018,6201,8335,54205,85236	H1-4,H2AC8,H2AZ1,H2BC3,RPS7,H2AC4,CYCS,H2BC12
2_Member	Reactome Gene Sets	R-HSA-8866654	E3 ubiquitin ligases ubiquitinate target proteins	-2.95167	-1.24535	3/59	3018,7332,85236	H2BC3,UBE2L3,H2BC12
2_Member	GO Biological Processes	GO:0034728	nucleosome organization	-2.84863	-1.10587	5/185	3008,3018,8349,85236,92815	H1-4,H2BC3,H2BC21,H2BC12,H2AW
2_Member	GO Biological Processes	GO:0006333	chromatin assembly or disassembly	-2.78765	-1.05849	5/191	3008,3018,8349,85236,92815	H1-4,H2BC3,H2BC21,H2BC12,H2AW
2_Member	Reactome Gene Sets	R-HSA-8852135	Protein ubiquitination	-2.5871	-0.93731	3/79	3018,7332,85236	H2BC3,UBE2L3,H2BC12
2_Member	Reactome Gene Sets	R-HSA-1640170	Cell Cycle	-2.51405	-0.824357	9/673	3012,3015,3018,4218,8335,8349,22919,81876,85236	H2AC8,H2AZ1,H2BC3,RAB8A,H2AC4,H2BC21,MAPRE1,RAB1B,H2BC12
2_Member	Reactome Gene Sets	R-HSA-73894	DNA Repair	-2.4241	-0.750417	6/334	3012,3015,3018,8335,8349,85236	H2AC8,H2AZ1,H2BC3,H2AC4,H2BC21,H2BC12
3_Summary	GO Biological Processes	GO:0002526	acute inflammatory response	-11.9279	-8.08587	14/222	2,325,718,720,721,727,1191,3133,3240,3250,3700,5004,5265,6288,100293534,2243,2244,3273,6280,8349,85236,100423062,348,6352,7791,1356,5879,51552,1509,54205,4218,8766,9230,81876,3107,28782,28988,6201,345	A2M,APCS,C3,C4A,C4B,C5,CLU,HLA-E,HP,HPR,ITIH4,ORM1,SERPINA1,SAA1,C4B_2,FGA,FGB,HRG,S100A9,H2BC21,H2BC12,IGLL5,APOE,CCL5,ZYX,CP,RAC1,RAB14,CTSD,CYCS,RAB8A,RAB11A,RAB11B,RAB1B,HLA-C,IGLV5-39,DBNL,RPS7,APOC3
3_Member	GO Biological Processes	GO:0002526	acute inflammatory response	-11.9279	-8.08587	14/222	2,325,718,720,721,727,1191,3133,3240,3250,3700,5004,5265,6288	A2M,APCS,C3,C4A,C4B,C5,CLU,HLA-E,HP,HPR,ITIH4,ORM1,SERPINA1,SAA1
3_Member	Reactome Gene Sets	R-HSA-174577	Activation of C3 and C5	-10.6204	-6.77844	5/8	718,720,721,727,100293534	C3,C4A,C4B,C5,C4B_2
3_Member	GO Biological Processes	GO:0006959	humoral immune response	-10.1644	-7.07577	15/361	2,325,718,720,721,727,1191,2243,2244,3133,3273,6280,8349,85236,100423062	A2M,APCS,C3,C4A,C4B,C5,CLU,FGA,FGB,HLA-E,HRG,S100A9,H2BC21,H2BC12,IGLL5
3_Member	KEGG Pathway	hsa04610	Complement and coagulation cascades	-10.1264	-7.07178	9/79	2,718,720,721,727,1191,2243,2244,5265	A2M,C3,C4A,C4B,C5,CLU,FGA,FGB,SERPINA1
3_Member	GO Biological Processes	GO:0072376	protein activation cascade	-7.65022	-4.95436	10/201	2,325,718,720,721,727,1191,2243,2244,100423062	A2M,APCS,C3,C4A,C4B,C5,CLU,FGA,FGB,IGLL5
3_Member	Reactome Gene Sets	R-HSA-977606	Regulation of Complement cascade	-7.21443	-4.5943	6/47	718,720,721,727,1191,100293534	C3,C4A,C4B,C5,CLU,C4B_2
3_Member	Reactome Gene Sets	R-HSA-166658	Complement cascade	-6.65529	-4.19309	6/58	718,720,721,727,1191,100293534	C3,C4A,C4B,C5,CLU,C4B_2
3_Member	GO Biological Processes	GO:0050727	regulation of inflammatory response	-6.3879	-3.97188	13/508	2,325,348,718,720,721,727,1191,3133,6280,6288,6352,7791	A2M,APCS,APOE,C3,C4A,C4B,C5,CLU,HLA-E,S100A9,SAA1,CCL5,ZYX
3_Member	Reactome Gene Sets	R-HSA-8957275	Post-translational protein phosphorylation	-6.27336	-3.88368	7/108	348,718,720,721,1356,2243,5265	APOE,C3,C4A,C4B,CP,FGA,SERPINA1
3_Member	GO Biological Processes	GO:0002673	regulation of acute inflammatory response	-6.21219	-3.84247	8/161	2,325,718,720,721,727,1191,3133	A2M,APCS,C3,C4A,C4B,C5,CLU,HLA-E
3_Member	Reactome Gene Sets	R-HSA-166663	Initial triggering of complement	-5.95595	-3.51765	4/23	718,720,721,100293534	C3,C4A,C4B,C4B_2
3_Member	GO Biological Processes	GO:0006956	complement activation	-5.88294	-3.57243	8/178	2,325,718,720,721,727,1191,100423062	A2M,APCS,C3,C4A,C4B,C5,CLU,IGLL5
3_Member	Reactome Gene Sets	R-HSA-381426	Regulation of Insulin-like Growth Factor (IGF) transport and uptake by Insulin-like Growth Factor Bi	-5.84379	-3.54587	7/125	348,718,720,721,1356,2243,5265	APOE,C3,C4A,C4B,CP,FGA,SERPINA1
3_Member	GO Biological Processes	GO:0043277	apoptotic cell clearance	-5.68598	-3.41609	5/47	718,720,721,5879,51552	C3,C4A,C4B,RAC1,RAB14
3_Member	GO Biological Processes	GO:2000427	positive regulation of apoptotic cell clearance	-5.66041	-3.29205	3/8	718,720,721	C3,C4A,C4B
3_Member	GO Biological Processes	GO:0052548	regulation of endopeptidase activity	-5.65212	-3.29205	10/429	2,718,720,721,727,1509,3273,5265,6280,54205	A2M,C3,C4A,C4B,C5,CTSD,HRG,SERPINA1,S100A9,CYCS
3_Member	GO Biological Processes	GO:0006958	complement activation, classical pathway	-5.49424	-3.26434	7/141	325,718,720,721,727,1191,100423062	APCS,C3,C4A,C4B,C5,CLU,IGLL5
3_Member	GO Biological Processes	GO:0052547	regulation of peptidase activity	-5.38343	-3.0937	10/460	2,718,720,721,727,1509,3273,5265,6280,54205	A2M,C3,C4A,C4B,C5,CTSD,HRG,SERPINA1,S100A9,CYCS
3_Member	GO Biological Processes	GO:2000425	regulation of apoptotic cell clearance	-5.33159	-3.06258	3/10	718,720,721	C3,C4A,C4B
3_Member	GO Biological Processes	GO:0043687	post-translational protein modification	-5.28623	-3.11325	10/364	348,718,720,1356,2243,4218,5265,8766,9230,81876	APOE,C3,C4A,CP,FGA,RAB8A,SERPINA1,RAB11A,RAB11B,RAB1B
3_Member	GO Biological Processes	GO:0002455	humoral immune response mediated by circulating immunoglobulin	-5.24095	-3.07107	7/154	325,718,720,721,727,1191,100423062	APCS,C3,C4A,C4B,C5,CLU,IGLL5
3_Member	GO Biological Processes	GO:0016064	immunoglobulin mediated immune response	-5.12865	-2.99423	8/225	325,718,720,721,727,1191,3133,100423062	APCS,C3,C4A,C4B,C5,CLU,HLA-E,IGLL5
3_Member	GO Biological Processes	GO:0019724	B cell mediated immunity	-5.08665	-2.96067	8/228	325,718,720,721,727,1191,3133,100423062	APCS,C3,C4A,C4B,C5,CLU,HLA-E,IGLL5
3_Member	GO Biological Processes	GO:0002250	adaptive immune response	-4.8911	-2.80244	13/696	325,718,720,721,727,1191,2243,2244,3107,3133,28782,28988,100423062	APCS,C3,C4A,C4B,C5,CLU,FGA,FGB,HLA-C,HLA-E,IGLV5-39,DBNL,IGLL5
3_Member	GO Biological Processes	GO:0030449	regulation of complement activation	-4.88039	-2.79428	6/116	2,718,720,721,727,1191	A2M,C3,C4A,C4B,C5,CLU
3_Member	GO Biological Processes	GO:2000257	regulation of protein activation cascade	-4.85908	-2.78053	6/117	2,718,720,721,727,1191	A2M,C3,C4A,C4B,C5,CLU
3_Member	GO Biological Processes	GO:0010951	negative regulation of endopeptidase activity	-4.75935	-2.70506	8/253	2,718,720,721,727,3273,3700,5265	A2M,C3,C4A,C4B,C5,HRG,ITIH4,SERPINA1
3_Member	GO Biological Processes	GO:0010466	negative regulation of peptidase activity	-4.60344	-2.58319	8/266	2,718,720,721,727,3273,3700,5265	A2M,C3,C4A,C4B,C5,HRG,ITIH4,SERPINA1
3_Member	GO Biological Processes	GO:0002920	regulation of humoral immune response	-4.50651	-2.51169	6/135	2,718,720,721,727,1191	A2M,C3,C4A,C4B,C5,CLU
3_Member	GO Biological Processes	GO:0045861	negative regulation of proteolysis	-4.40949	-2.43082	9/368	2,718,720,721,727,3273,3700,5265,6201	A2M,C3,C4A,C4B,C5,HRG,ITIH4,SERPINA1,RPS7
3_Member	KEGG Pathway	hsa05150	Staphylococcus aureus infection	-4.37572	-2.36092	4/56	718,720,721,727	C3,C4A,C4B,C5
3_Member	GO Biological Processes	GO:0051346	negative regulation of hydrolase activity	-4.33284	-2.36784	10/470	2,325,345,718,720,721,727,3273,3700,5265	A2M,APCS,APOC3,C3,C4A,C4B,C5,HRG,ITIH4,SERPINA1
3_Member	GO Biological Processes	GO:0016485	protein processing	-3.97389	-2.06641	8/327	2,718,720,721,727,1191,2243,2244	A2M,C3,C4A,C4B,C5,CLU,FGA,FGB
3_Member	KEGG Pathway	hsa05133	Pertussis	-3.85525	-1.94608	4/76	718,720,721,727	C3,C4A,C4B,C5
3_Member	GO Biological Processes	GO:0070613	regulation of protein processing	-3.81432	-1.92172	6/180	2,718,720,721,727,1191	A2M,C3,C4A,C4B,C5,CLU
3_Member	GO Biological Processes	GO:1903317	regulation of protein maturation	-3.78822	-1.89886	6/182	2,718,720,721,727,1191	A2M,C3,C4A,C4B,C5,CLU
3_Member	GO Biological Processes	GO:0002449	lymphocyte mediated immunity	-3.65607	-1.78413	8/364	325,718,720,721,727,1191,3133,100423062	APCS,C3,C4A,C4B,C5,CLU,HLA-E,IGLL5
3_Member	GO Biological Processes	GO:0002460	adaptive immune response based on somatic recombination of immune receptors built from immunoglobuli	-3.64001	-1.774	8/366	325,718,720,721,727,1191,3133,100423062	APCS,C3,C4A,C4B,C5,CLU,HLA-E,IGLL5
3_Member	GO Biological Processes	GO:0051604	protein maturation	-3.4111	-1.57629	8/396	2,718,720,721,727,1191,2243,2244	A2M,C3,C4A,C4B,C5,CLU,FGA,FGB
3_Member	GO Biological Processes	GO:0045807	positive regulation of endocytosis	-3.20476	-1.39485	5/154	348,718,720,721,1191	APOE,C3,C4A,C4B,CLU
3_Member	GO Biological Processes	GO:0050766	positive regulation of phagocytosis	-2.79189	-1.11426	3/67	718,720,721	C3,C4A,C4B
3_Member	GO Biological Processes	GO:0050764	regulation of phagocytosis	-2.34841	-0.741107	3/96	718,720,721	C3,C4A,C4B
4_Summary	Reactome Gene Sets	R-HSA-76002	Platelet activation, signaling and aggregation	-10.9332	-7.49689	14/263	2,308,1191,2243,2244,2787,2791,3273,3700,5004,5265,5341,5879,5908,348,1465,3611,6288,30845,4830,8766,325,7168,136319,6352,6251,10109,3133,6280,727,28988,718,7791,7430,7276,9230,51762,344,345,7408,57142,8676,1509	A2M,ANXA5,CLU,FGA,FGB,GNG5,GNG11,HRG,ITIH4,ORM1,SERPINA1,PLEK,RAC1,RAP1B,APOE,CSRP1,ILK,SAA1,EHD3,NME1,RAB11A,APCS,TPM1,MTPN,CCL5,RSU1,ARPC2,HLA-E,S100A9,C5,DBNL,C3,ZYX,EZR,TTR,RAB11B,RAB8B,APOC2,APOC3,VASP,RTN4,STX11,CTSD
4_Member	Reactome Gene Sets	R-HSA-76002	Platelet activation, signaling and aggregation	-10.9332	-7.49689	14/263	2,308,1191,2243,2244,2787,2791,3273,3700,5004,5265,5341,5879,5908	A2M,ANXA5,CLU,FGA,FGB,GNG5,GNG11,HRG,ITIH4,ORM1,SERPINA1,PLEK,RAC1,RAP1B
4_Member	GO Biological Processes	GO:0002576	platelet degranulation	-9.55162	-6.59503	10/128	2,308,1191,2243,2244,3273,3700,5004,5265,5341	A2M,ANXA5,CLU,FGA,FGB,HRG,ITIH4,ORM1,SERPINA1,PLEK
4_Member	Reactome Gene Sets	R-HSA-114608	Platelet degranulation	-9.51817	-6.59503	10/129	2,308,1191,2243,2244,3273,3700,5004,5265,5341	A2M,ANXA5,CLU,FGA,FGB,HRG,ITIH4,ORM1,SERPINA1,PLEK
4_Member	Reactome Gene Sets	R-HSA-76005	Response to elevated platelet cytosolic Ca2+	-9.35504	-6.46729	10/134	2,308,1191,2243,2244,3273,3700,5004,5265,5341	A2M,ANXA5,CLU,FGA,FGB,HRG,ITIH4,ORM1,SERPINA1,PLEK
4_Member	GO Biological Processes	GO:0007596	blood coagulation	-8.74345	-5.48386	12/336	2,308,348,1465,2243,2244,3273,3611,5265,5341,6288,30845	A2M,ANXA5,APOE,CSRP1,FGA,FGB,HRG,ILK,SERPINA1,PLEK,SAA1,EHD3
4_Member	GO Biological Processes	GO:0050878	regulation of body fluid levels	-8.69942	-5.48386	14/507	2,308,348,1465,2243,2244,3273,3611,4830,5265,5341,6288,8766,30845	A2M,ANXA5,APOE,CSRP1,FGA,FGB,HRG,ILK,NME1,SERPINA1,PLEK,SAA1,RAB11A,EHD3
4_Member	GO Biological Processes	GO:0007599	hemostasis	-8.67116	-5.48386	12/341	2,308,348,1465,2243,2244,3273,3611,5265,5341,6288,30845	A2M,ANXA5,APOE,CSRP1,FGA,FGB,HRG,ILK,SERPINA1,PLEK,SAA1,EHD3
4_Member	GO Biological Processes	GO:0050817	coagulation	-8.65684	-5.48386	12/342	2,308,348,1465,2243,2244,3273,3611,5265,5341,6288,30845	A2M,ANXA5,APOE,CSRP1,FGA,FGB,HRG,ILK,SERPINA1,PLEK,SAA1,EHD3
4_Member	GO Biological Processes	GO:0042060	wound healing	-8.27705	-5.47646	16/576	2,308,325,348,1465,2243,2244,3273,3611,5265,5341,5879,6288,7168,30845,136319	A2M,ANXA5,APCS,APOE,CSRP1,FGA,FGB,HRG,ILK,SERPINA1,PLEK,RAC1,SAA1,TPM1,EHD3,MTPN
4_Member	GO Biological Processes	GO:0030168	platelet activation	-7.2107	-4.41011	8/154	348,1465,2243,2244,3273,3611,5341,6288	APOE,CSRP1,FGA,FGB,HRG,ILK,PLEK,SAA1
4_Member	GO Biological Processes	GO:0009611	response to wounding	-7.17749	-4.57867	16/691	2,308,325,348,1465,2243,2244,3273,3611,5265,5341,5879,6288,7168,30845,136319	A2M,ANXA5,APCS,APOE,CSRP1,FGA,FGB,HRG,ILK,SERPINA1,PLEK,RAC1,SAA1,TPM1,EHD3,MTPN
4_Member	Reactome Gene Sets	R-HSA-109582	Hemostasis	-6.97705	-4.4288	15/622	2,308,1191,2243,2244,2787,2791,3273,3700,5004,5265,5341,5879,5908,30845	A2M,ANXA5,CLU,FGA,FGB,GNG5,GNG11,HRG,ITIH4,ORM1,SERPINA1,PLEK,RAC1,RAP1B,EHD3
4_Member	GO Biological Processes	GO:0034109	homotypic cell-cell adhesion	-6.33815	-3.76134	6/84	1465,2243,2244,3611,5341,6352	CSRP1,FGA,FGB,ILK,PLEK,CCL5
4_Member	GO Biological Processes	GO:0010811	positive regulation of cell-substrate adhesion	-5.96317	-3.63529	7/120	2243,2244,3273,3611,5879,6251,10109	FGA,FGB,HRG,ILK,RAC1,RSU1,ARPC2
4_Member	GO Biological Processes	GO:0070527	platelet aggregation	-5.69233	-3.30772	5/60	1465,2243,2244,3611,5341	CSRP1,FGA,FGB,ILK,PLEK
4_Member	GO Biological Processes	GO:0045785	positive regulation of cell adhesion	-5.60853	-3.35389	11/416	2243,2244,3133,3273,3611,5879,6251,6288,6352,7168,10109	FGA,FGB,HLA-E,HRG,ILK,RAC1,RSU1,SAA1,CCL5,TPM1,ARPC2
4_Member	GO Biological Processes	GO:0030193	regulation of blood coagulation	-5.15383	-2.93163	5/77	348,2243,2244,3273,5341	APOE,FGA,FGB,HRG,PLEK
4_Member	GO Biological Processes	GO:1900046	regulation of hemostasis	-5.12623	-2.91771	5/78	348,2243,2244,3273,5341	APOE,FGA,FGB,HRG,PLEK
4_Member	GO Biological Processes	GO:0050818	regulation of coagulation	-5.0195	-2.84027	5/82	348,2243,2244,3273,5341	APOE,FGA,FGB,HRG,PLEK
4_Member	Reactome Gene Sets	R-HSA-354194	GRB2:SOS provides linkage to MAPK signaling for Integrins	-4.75817	-2.65391	3/15	2243,2244,5908	FGA,FGB,RAP1B
4_Member	Reactome Gene Sets	R-HSA-372708	p130Cas linkage to MAPK signaling for integrins	-4.75817	-2.65391	3/15	2243,2244,5908	FGA,FGB,RAP1B
4_Member	GO Biological Processes	GO:0061045	negative regulation of wound healing	-4.70595	-2.66101	5/74	325,348,2243,2244,3273	APCS,APOE,FGA,FGB,HRG
4_Member	GO Biological Processes	GO:1900026	positive regulation of substrate adhesion-dependent cell spreading	-4.62007	-2.59763	4/38	2243,2244,5879,10109	FGA,FGB,RAC1,ARPC2
4_Member	GO Biological Processes	GO:0030195	negative regulation of blood coagulation	-4.60668	-2.53061	4/49	348,2243,2244,3273	APOE,FGA,FGB,HRG
4_Member	GO Biological Processes	GO:1900047	negative regulation of hemostasis	-4.57161	-2.50292	4/50	348,2243,2244,3273	APOE,FGA,FGB,HRG
4_Member	GO Biological Processes	GO:0050819	negative regulation of coagulation	-4.47071	-2.42112	4/53	348,2243,2244,3273	APOE,FGA,FGB,HRG
4_Member	Reactome Gene Sets	R-HSA-5686938	Regulation of TLR by endogenous ligand	-4.43419	-2.39384	3/19	2243,2244,6280	FGA,FGB,S100A9
4_Member	GO Biological Processes	GO:1903035	negative regulation of response to wounding	-4.31776	-2.35468	5/89	325,348,2243,2244,3273	APCS,APOE,FGA,FGB,HRG
4_Member	GO Biological Processes	GO:0010810	regulation of cell-substrate adhesion	-4.30516	-2.34399	7/215	2243,2244,3273,3611,5879,6251,10109	FGA,FGB,HRG,ILK,RAC1,RSU1,ARPC2
4_Member	GO Biological Processes	GO:0061041	regulation of wound healing	-4.18677	-2.24424	6/154	325,348,2243,2244,3273,5341	APCS,APOE,FGA,FGB,HRG,PLEK
4_Member	GO Biological Processes	GO:0034446	substrate adhesion-dependent cell spreading	-4.11766	-2.18949	5/98	2243,2244,3611,5879,10109	FGA,FGB,ILK,RAC1,ARPC2
4_Member	GO Biological Processes	GO:0042730	fibrinolysis	-4.06527	-2.11166	3/25	2243,2244,3273	FGA,FGB,HRG
4_Member	GO Biological Processes	GO:1900024	regulation of substrate adhesion-dependent cell spreading	-4.04379	-2.12952	4/53	2243,2244,5879,10109	FGA,FGB,RAC1,ARPC2
4_Member	GO Biological Processes	GO:0072378	blood coagulation, fibrin clot formation	-3.96304	-2.02708	3/27	2,2243,2244	A2M,FGA,FGB
4_Member	Reactome Gene Sets	R-HSA-354192	Integrin signaling	-3.96304	-2.02708	3/27	2243,2244,5908	FGA,FGB,RAP1B
4_Member	GO Biological Processes	GO:0043410	positive regulation of MAPK cascade	-3.92112	-1.99118	9/552	348,727,2243,2244,3611,5908,6288,6352,28988	APOE,C5,FGA,FGB,ILK,RAP1B,SAA1,CCL5,DBNL
4_Member	Canonical Pathways	M169	PID INTEGRIN2 PATHWAY	-3.86856	-1.95257	3/29	718,2243,2244	C3,FGA,FGB
4_Member	GO Biological Processes	GO:0031589	cell-substrate adhesion	-3.74637	-1.8666	8/353	2243,2244,3273,3611,5879,6251,7791,10109	FGA,FGB,HRG,ILK,RAC1,RSU1,ZYX,ARPC2
4_Member	GO Biological Processes	GO:1903034	regulation of response to wounding	-3.73698	-1.86035	6/186	325,348,2243,2244,3273,5341	APCS,APOE,FGA,FGB,HRG,PLEK
4_Member	Reactome Gene Sets	R-HSA-6802948	Signaling by high-kinase activity BRAF mutants	-3.58519	-1.72011	3/36	2243,2244,5908	FGA,FGB,RAP1B
4_Member	GO Biological Processes	GO:0043408	regulation of MAPK cascade	-3.57593	-1.71471	10/754	348,727,2243,2244,3611,5908,6288,6352,7430,28988	APOE,C5,FGA,FGB,ILK,RAP1B,SAA1,CCL5,EZR,DBNL
4_Member	Reactome Gene Sets	R-HSA-140877	Formation of Fibrin Clot (Clotting Cascade)	-3.48122	-1.64926	3/39	2,2243,2244	A2M,FGA,FGB
4_Member	Reactome Gene Sets	R-HSA-76009	Platelet Aggregation (Plug Formation)	-3.48122	-1.64926	3/39	2243,2244,5908	FGA,FGB,RAP1B
4_Member	GO Biological Processes	GO:0030155	regulation of cell adhesion	-3.46858	-1.6266	11/716	2243,2244,3133,3273,3611,5879,6251,6288,6352,7168,10109	FGA,FGB,HLA-E,HRG,ILK,RAC1,RSU1,SAA1,CCL5,TPM1,ARPC2
4_Member	Reactome Gene Sets	R-HSA-5674135	MAP2K and MAPK activation	-3.44844	-1.6304	3/40	2243,2244,5908	FGA,FGB,RAP1B
4_Member	GO Biological Processes	GO:0007160	cell-matrix adhesion	-3.25487	-1.43269	6/229	2243,2244,3273,3611,5879,7791	FGA,FGB,HRG,ILK,RAC1,ZYX
4_Member	Reactome Gene Sets	R-HSA-6802946	Signaling by moderate kinase activity BRAF mutants	-3.24083	-1.485	3/47	2243,2244,5908	FGA,FGB,RAP1B
4_Member	Reactome Gene Sets	R-HSA-6802949	Signaling by RAS mutants	-3.24083	-1.485	3/47	2243,2244,5908	FGA,FGB,RAP1B
4_Member	Reactome Gene Sets	R-HSA-6802955	Paradoxical activation of RAF signaling by kinase inactive BRAF	-3.24083	-1.485	3/47	2243,2244,5908	FGA,FGB,RAP1B
4_Member	Reactome Gene Sets	R-HSA-9649948	Signaling downstream of RAS mutants	-3.24083	-1.485	3/47	2243,2244,5908	FGA,FGB,RAP1B
4_Member	GO Biological Processes	GO:0009914	hormone transport	-3.2147	-1.4021	7/324	2243,2244,5879,6352,7276,9230,51762	FGA,FGB,RAC1,CCL5,TTR,RAB11B,RAB8B
4_Member	GO Biological Processes	GO:0070372	regulation of ERK1 and ERK2 cascade	-3.16054	-1.41431	6/308	348,2243,2244,5908,6352,7430	APOE,FGA,FGB,RAP1B,CCL5,EZR
4_Member	GO Biological Processes	GO:0043062	extracellular structure organization	-3.15172	-1.40781	7/429	2,344,345,348,2243,2244,7276	A2M,APOC2,APOC3,APOE,FGA,FGB,TTR
4_Member	KEGG Pathway	hsa04611	Platelet activation	-3.05873	-1.32958	4/123	2243,2244,5908,7408	FGA,FGB,RAP1B,VASP
4_Member	GO Biological Processes	GO:0045088	regulation of innate immune response	-3.04218	-1.26465	8/451	2,348,2243,2244,3133,6280,6352,57142	A2M,APOE,FGA,FGB,HLA-E,S100A9,CCL5,RTN4
4_Member	GO Biological Processes	GO:0070371	ERK1 and ERK2 cascade	-3.01897	-1.29865	6/328	348,2243,2244,5908,6352,7430	APOE,FGA,FGB,RAP1B,CCL5,EZR
4_Member	GO Biological Processes	GO:0090277	positive regulation of peptide hormone secretion	-3.01894	-1.2439	4/98	2243,2244,5879,51762	FGA,FGB,RAC1,RAB8B
4_Member	GO Biological Processes	GO:0070374	positive regulation of ERK1 and ERK2 cascade	-3.01226	-1.29304	5/219	348,2243,2244,5908,6352	APOE,FGA,FGB,RAP1B,CCL5
4_Member	GO Biological Processes	GO:0023061	signal release	-2.94532	-1.18373	8/467	2243,2244,5879,5908,6352,8676,9230,51762	FGA,FGB,RAC1,RAP1B,CCL5,STX11,RAB11B,RAB8B
4_Member	GO Biological Processes	GO:0032102	negative regulation of response to external stimulus	-2.83949	-1.09788	7/376	325,348,727,2243,2244,3273,6288	APCS,APOE,C5,FGA,FGB,HRG,SAA1
4_Member	Reactome Gene Sets	R-HSA-6802952	Signaling by BRAF and RAF fusions	-2.79189	-1.11426	3/67	2243,2244,5908	FGA,FGB,RAP1B
4_Member	GO Biological Processes	GO:0002224	toll-like receptor signaling pathway	-2.69896	-1.0321	4/154	2243,2244,6280,57142	FGA,FGB,S100A9,RTN4
4_Member	Reactome Gene Sets	R-HSA-6802957	Oncogenic MAPK signaling	-2.66806	-1.00696	3/74	2243,2244,5908	FGA,FGB,RAP1B
4_Member	Reactome Gene Sets	R-HSA-168898	Toll-like Receptor Cascades	-2.65849	-0.999304	4/158	2243,2244,6280,6288	FGA,FGB,S100A9,SAA1
4_Member	GO Biological Processes	GO:1903524	positive regulation of blood circulation	-2.6514	-0.993162	3/75	2243,2244,7168	FGA,FGB,TPM1
4_Member	GO Biological Processes	GO:0090276	regulation of peptide hormone secretion	-2.61728	-0.91202	5/209	2243,2244,5879,6352,51762	FGA,FGB,RAC1,CCL5,RAB8B
4_Member	Reactome Gene Sets	R-HSA-1474244	Extracellular matrix organization	-2.41133	-0.793797	5/301	2,1509,2243,2244,7276	A2M,CTSD,FGA,FGB,TTR
4_Member	GO Biological Processes	GO:0002221	pattern recognition receptor signaling pathway	-2.29278	-0.704455	4/200	2243,2244,6280,57142	FGA,FGB,S100A9,RTN4
4_Member	GO Biological Processes	GO:0031349	positive regulation of defense response	-2.08406	-0.444386	7/517	718,2243,2244,3133,6280,6352,57142	C3,FGA,FGB,HLA-E,S100A9,CCL5,RTN4
5_Summary	Reactome Gene Sets	R-HSA-8873719	RAB geranylgeranylation	-10.9129	-7.49689	9/65	4218,5870,8766,9230,10890,11021,51552,51762,81876,345,348,5879,5899,5908,28988,55845,2,3240,3250,5265,6288,10094,10109,10525,5341,7430,8676,22919,3107,3133,30845,2243,2244,6201,6747	RAB8A,RAB6A,RAB11A,RAB11B,RAB10,RAB35,RAB14,RAB8B,RAB1B,APOC3,APOE,RAC1,RALB,RAP1B,DBNL,BRK1,A2M,HP,HPR,SERPINA1,SAA1,ARPC3,ARPC2,HYOU1,PLEK,EZR,STX11,MAPRE1,HLA-C,HLA-E,EHD3,FGA,FGB,RPS7,SSR3
5_Member	Reactome Gene Sets	R-HSA-8873719	RAB geranylgeranylation	-10.9129	-7.49689	9/65	4218,5870,8766,9230,10890,11021,51552,51762,81876	RAB8A,RAB6A,RAB11A,RAB11B,RAB10,RAB35,RAB14,RAB8B,RAB1B
5_Member	GO Biological Processes	GO:0007265	Ras protein signal transduction	-10.5438	-7.22827	16/402	345,348,4218,5870,5879,5899,5908,8766,9230,10890,11021,28988,51552,51762,55845,81876	APOC3,APOE,RAB8A,RAB6A,RAC1,RALB,RAP1B,RAB11A,RAB11B,RAB10,RAB35,DBNL,RAB14,RAB8B,BRK1,RAB1B
5_Member	GO Biological Processes	GO:0032482	Rab protein signal transduction	-10.3345	-7.12939	9/75	4218,5870,8766,9230,10890,11021,51552,51762,81876	RAB8A,RAB6A,RAB11A,RAB11B,RAB10,RAB35,RAB14,RAB8B,RAB1B
5_Member	GO Biological Processes	GO:0007264	small GTPase mediated signal transduction	-9.40795	-6.50381	17/556	2,345,348,4218,5870,5879,5899,5908,8766,9230,10890,11021,28988,51552,51762,55845,81876	A2M,APOC3,APOE,RAB8A,RAB6A,RAC1,RALB,RAP1B,RAB11A,RAB11B,RAB10,RAB35,DBNL,RAB14,RAB8B,BRK1,RAB1B
5_Member	Reactome Gene Sets	R-HSA-5653656	Vesicle-mediated transport	-9.01844	-6.14649	18/673	348,3240,3250,4218,5265,5870,5879,6288,8766,9230,10094,10109,10525,10890,11021,51552,51762,81876	APOE,HP,HPR,RAB8A,SERPINA1,RAB6A,RAC1,SAA1,RAB11A,RAB11B,ARPC3,ARPC2,HYOU1,RAB10,RAB35,RAB14,RAB8B,RAB1B
5_Member	Reactome Gene Sets	R-HSA-9007101	Rab regulation of trafficking	-8.35954	-5.54558	9/124	4218,5870,8766,9230,10890,11021,51552,51762,81876	RAB8A,RAB6A,RAB11A,RAB11B,RAB10,RAB35,RAB14,RAB8B,RAB1B
5_Member	GO Biological Processes	GO:0022406	membrane docking	-7.89066	-4.87651	9/181	4218,5341,5899,7430,8676,8766,10890,22919,51762	RAB8A,PLEK,RALB,EZR,STX11,RAB11A,RAB10,MAPRE1,RAB8B
5_Member	Reactome Gene Sets	R-HSA-8854214	TBC/RABGAPs	-7.27219	-4.63432	6/46	4218,5870,8766,9230,11021,51762	RAB8A,RAB6A,RAB11A,RAB11B,RAB35,RAB8B
5_Member	GO Biological Processes	GO:0048278	vesicle docking	-6.96737	-4.25032	6/66	4218,5341,5899,8676,10890,51762	RAB8A,PLEK,RALB,STX11,RAB10,RAB8B
5_Member	GO Biological Processes	GO:0140056	organelle localization by membrane tethering	-6.83982	-4.14396	8/172	4218,5341,5899,8676,8766,10890,22919,51762	RAB8A,PLEK,RALB,STX11,RAB11A,RAB10,MAPRE1,RAB8B
5_Member	Reactome Gene Sets	R-HSA-8876198	RAB GEFs exchange GTP for GDP on RABs	-6.81695	-4.30403	7/90	4218,5870,10890,11021,51552,51762,81876	RAB8A,RAB6A,RAB10,RAB35,RAB14,RAB8B,RAB1B
5_Member	KEGG Pathway	hsa04144	Endocytosis	-6.60374	-4.15387	10/260	3107,3133,4218,8766,9230,10094,10109,10890,11021,30845	HLA-C,HLA-E,RAB8A,RAB11A,RAB11B,ARPC3,ARPC2,RAB10,RAB35,EHD3
5_Member	GO Biological Processes	GO:0006904	vesicle docking involved in exocytosis	-6.37505	-3.76351	5/44	4218,5341,5899,10890,51762	RAB8A,PLEK,RALB,RAB10,RAB8B
5_Member	GO Biological Processes	GO:0140029	exocytic process	-6.30755	-3.75187	6/85	4218,5341,5899,8676,10890,51762	RAB8A,PLEK,RALB,STX11,RAB10,RAB8B
5_Member	GO Biological Processes	GO:0051640	organelle localization	-5.3531	-3.15784	14/732	4218,5265,5341,5870,5899,5908,7430,8676,8766,9230,10890,22919,51762,81876	RAB8A,SERPINA1,PLEK,RAB6A,RALB,RAP1B,EZR,STX11,RAB11A,RAB11B,RAB10,MAPRE1,RAB8B,RAB1B
5_Member	Reactome Gene Sets	R-HSA-199991	Membrane Trafficking	-5.32394	-3.13837	13/634	4218,5265,5870,5879,8766,9230,10094,10109,10890,11021,51552,51762,81876	RAB8A,SERPINA1,RAB6A,RAC1,RAB11A,RAB11B,ARPC3,ARPC2,RAB10,RAB35,RAB14,RAB8B,RAB1B
5_Member	GO Biological Processes	GO:0016197	endosomal transport	-5.01803	-2.90575	8/233	4218,5870,8766,9230,10890,11021,30845,51552	RAB8A,RAB6A,RAB11A,RAB11B,RAB10,RAB35,EHD3,RAB14
5_Member	GO Biological Processes	GO:0017157	regulation of exocytosis	-4.92657	-2.76883	7/222	2243,2244,4218,5899,5908,10890,51762	FGA,FGB,RAB8A,RALB,RAP1B,RAB10,RAB8B
5_Member	Reactome Gene Sets	R-HSA-1445148	Translocation of SLC2A4 (GLUT4) to the plasma membrane	-4.7641	-2.70507	5/72	4218,5879,8766,10890,51552	RAB8A,RAC1,RAB11A,RAB10,RAB14
5_Member	GO Biological Processes	GO:0048193	Golgi vesicle transport	-4.33722	-2.37029	9/376	4218,5265,5870,10525,10890,30845,51552,51762,81876	RAB8A,SERPINA1,RAB6A,HYOU1,RAB10,EHD3,RAB14,RAB8B,RAB1B
5_Member	GO Biological Processes	GO:0072657	protein localization to membrane	-3.52051	-1.66771	9/625	348,4218,6201,6747,7430,8766,10890,30845,51762	APOE,RAB8A,RPS7,SSR3,EZR,RAB11A,RAB10,EHD3,RAB8B
5_Member	GO Biological Processes	GO:0072659	protein localization to plasma membrane	-3.46168	-1.63811	6/270	4218,7430,8766,10890,30845,51762	RAB8A,EZR,RAB11A,RAB10,EHD3,RAB8B
5_Member	GO Biological Processes	GO:0090150	establishment of protein localization to membrane	-3.19894	-1.39258	7/326	4218,6201,6747,8766,9230,10890,51762	RAB8A,RPS7,SSR3,RAB11A,RAB11B,RAB10,RAB8B
5_Member	GO Biological Processes	GO:0016050	vesicle organization	-3.12946	-1.34042	7/335	4218,5265,8676,8766,51552,51762,81876	RAB8A,SERPINA1,STX11,RAB11A,RAB14,RAB8B,RAB1B
5_Member	GO Biological Processes	GO:0098876	vesicle-mediated transport to the plasma membrane	-3.0694	-1.28432	4/95	4218,8766,9230,10890	RAB8A,RAB11A,RAB11B,RAB10
5_Member	GO Biological Processes	GO:1990778	protein localization to cell periphery	-3.05339	-1.32535	6/323	4218,7430,8766,10890,30845,51762	RAB8A,EZR,RAB11A,RAB10,EHD3,RAB8B
5_Member	GO Biological Processes	GO:0061951	establishment of protein localization to plasma membrane	-2.90964	-1.20858	3/61	4218,8766,10890	RAB8A,RAB11A,RAB10
5_Member	KEGG Pathway	hsa04152	AMPK signaling pathway	-2.69442	-0.981489	4/120	4218,9230,10890,51552	RAB8A,RAB11B,RAB10,RAB14
5_Member	GO Biological Processes	GO:0006906	vesicle fusion	-2.31111	-0.713041	3/99	4218,8676,51762	RAB8A,STX11,RAB8B
5_Member	GO Biological Processes	GO:0090174	organelle membrane fusion	-2.24009	-0.666063	3/105	4218,8676,51762	RAB8A,STX11,RAB8B
6_Summary	GO Biological Processes	GO:0097435	supramolecular fiber organization	-10.5332	-7.22827	20/698	70,348,1191,1465,3611,5341,5879,7168,7169,7170,7408,7430,7791,8766,10094,10109,22919,28988,55845,136319,3273,2,325,718,720,721,727,2243,2244,6280,57142,100423062,5899,5908,2787,2791,7332	ACTC1,APOE,CLU,CSRP1,ILK,PLEK,RAC1,TPM1,TPM2,TPM3,VASP,EZR,ZYX,RAB11A,ARPC3,ARPC2,MAPRE1,DBNL,BRK1,MTPN,HRG,A2M,APCS,C3,C4A,C4B,C5,FGA,FGB,S100A9,RTN4,IGLL5,RALB,RAP1B,GNG5,GNG11,UBE2L3
6_Member	GO Biological Processes	GO:0097435	supramolecular fiber organization	-10.5332	-7.22827	20/698	70,348,1191,1465,3611,5341,5879,7168,7169,7170,7408,7430,7791,8766,10094,10109,22919,28988,55845,136319	ACTC1,APOE,CLU,CSRP1,ILK,PLEK,RAC1,TPM1,TPM2,TPM3,VASP,EZR,ZYX,RAB11A,ARPC3,ARPC2,MAPRE1,DBNL,BRK1,MTPN
6_Member	GO Biological Processes	GO:0007015	actin filament organization	-8.19893	-5.4113	14/426	70,5341,5879,7168,7169,7170,7408,7430,7791,10094,10109,28988,55845,136319	ACTC1,PLEK,RAC1,TPM1,TPM2,TPM3,VASP,EZR,ZYX,ARPC3,ARPC2,DBNL,BRK1,MTPN
6_Member	GO Biological Processes	GO:0030036	actin cytoskeleton organization	-7.98339	-5.24407	17/692	70,1465,3273,3611,5341,5879,7168,7169,7170,7408,7430,7791,10094,10109,28988,55845,136319	ACTC1,CSRP1,HRG,ILK,PLEK,RAC1,TPM1,TPM2,TPM3,VASP,EZR,ZYX,ARPC3,ARPC2,DBNL,BRK1,MTPN
6_Member	GO Biological Processes	GO:0002253	activation of immune response	-7.63497	-4.94933	17/731	2,325,718,720,721,727,1191,2243,2244,5879,6280,7430,10094,10109,55845,57142,100423062	A2M,APCS,C3,C4A,C4B,C5,CLU,FGA,FGB,RAC1,S100A9,EZR,ARPC3,ARPC2,BRK1,RTN4,IGLL5
6_Member	GO Biological Processes	GO:1902905	positive regulation of supramolecular fiber organization	-7.47003	-4.81368	10/210	348,1191,5341,5879,7168,7408,10094,10109,22919,55845	APOE,CLU,PLEK,RAC1,TPM1,VASP,ARPC3,ARPC2,MAPRE1,BRK1
6_Member	GO Biological Processes	GO:0043254	regulation of protein complex assembly	-7.45883	-4.81182	14/488	348,1191,3273,5341,5879,5899,5908,7408,10094,10109,22919,28988,55845,136319	APOE,CLU,HRG,PLEK,RAC1,RALB,RAP1B,VASP,ARPC3,ARPC2,MAPRE1,DBNL,BRK1,MTPN
6_Member	GO Biological Processes	GO:0030029	actin filament-based process	-7.18769	-4.57867	17/785	70,1465,3273,3611,5341,5879,7168,7169,7170,7408,7430,7791,10094,10109,28988,55845,136319	ACTC1,CSRP1,HRG,ILK,PLEK,RAC1,TPM1,TPM2,TPM3,VASP,EZR,ZYX,ARPC3,ARPC2,DBNL,BRK1,MTPN
6_Member	GO Biological Processes	GO:0032956	regulation of actin cytoskeleton organization	-7.16538	-4.57867	12/359	3273,3611,5341,5879,7168,7408,7430,10094,10109,28988,55845,136319	HRG,ILK,PLEK,RAC1,TPM1,VASP,EZR,ARPC3,ARPC2,DBNL,BRK1,MTPN
6_Member	GO Biological Processes	GO:1902903	regulation of supramolecular fiber organization	-7.02317	-4.46698	12/370	348,1191,5341,5879,7168,7408,10094,10109,22919,28988,55845,136319	APOE,CLU,PLEK,RAC1,TPM1,VASP,ARPC3,ARPC2,MAPRE1,DBNL,BRK1,MTPN
6_Member	GO Biological Processes	GO:0051493	regulation of cytoskeleton organization	-6.77275	-4.26656	14/555	3273,3611,5341,5879,6280,7168,7408,7430,10094,10109,22919,28988,55845,136319	HRG,ILK,PLEK,RAC1,S100A9,TPM1,VASP,EZR,ARPC3,ARPC2,MAPRE1,DBNL,BRK1,MTPN
6_Member	GO Biological Processes	GO:0032970	regulation of actin filament-based process	-6.61247	-4.15668	12/404	3273,3611,5341,5879,7168,7408,7430,10094,10109,28988,55845,136319	HRG,ILK,PLEK,RAC1,TPM1,VASP,EZR,ARPC3,ARPC2,DBNL,BRK1,MTPN
6_Member	GO Biological Processes	GO:0051258	protein polymerization	-6.16933	-3.80498	10/290	2243,2244,5879,7408,10094,10109,22919,28988,55845,136319	FGA,FGB,RAC1,VASP,ARPC3,ARPC2,MAPRE1,DBNL,BRK1,MTPN
6_Member	GO Biological Processes	GO:0110053	regulation of actin filament organization	-5.40212	-3.20239	9/276	5341,5879,7168,7408,10094,10109,28988,55845,136319	PLEK,RAC1,TPM1,VASP,ARPC3,ARPC2,DBNL,BRK1,MTPN
6_Member	GO Biological Processes	GO:0031334	positive regulation of protein complex assembly	-5.28918	-3.11325	9/285	1191,5341,5879,5908,7408,10094,10109,22919,55845	CLU,PLEK,RAC1,RAP1B,VASP,ARPC3,ARPC2,MAPRE1,BRK1
6_Member	GO Biological Processes	GO:0008154	actin polymerization or depolymerization	-5.28822	-3.11325	8/214	5341,5879,7408,10094,10109,28988,55845,136319	PLEK,RAC1,VASP,ARPC3,ARPC2,DBNL,BRK1,MTPN
6_Member	GO Biological Processes	GO:0044089	positive regulation of cellular component biogenesis	-5.147	-3.00974	12/559	1191,3273,5341,5879,5899,5908,7168,7408,10094,10109,22919,55845	CLU,HRG,PLEK,RAC1,RALB,RAP1B,TPM1,VASP,ARPC3,ARPC2,MAPRE1,BRK1
6_Member	GO Biological Processes	GO:0032271	regulation of protein polymerization	-5.08665	-2.96067	8/228	5879,7408,10094,10109,22919,28988,55845,136319	RAC1,VASP,ARPC3,ARPC2,MAPRE1,DBNL,BRK1,MTPN
6_Member	GO Biological Processes	GO:0051495	positive regulation of cytoskeleton organization	-5.03162	-2.91452	8/232	5341,5879,7168,7408,10094,10109,22919,55845	PLEK,RAC1,TPM1,VASP,ARPC3,ARPC2,MAPRE1,BRK1
6_Member	GO Biological Processes	GO:0010591	regulation of lamellipodium assembly	-4.816	-2.74732	4/34	3273,5879,10109,55845	HRG,RAC1,ARPC2,BRK1
6_Member	Reactome Gene Sets	R-HSA-5663213	RHO GTPases Activate WASPs and WAVEs	-4.71511	-2.66784	4/36	5879,10094,10109,55845	RAC1,ARPC3,ARPC2,BRK1
6_Member	GO Biological Processes	GO:0008064	regulation of actin polymerization or depolymerization	-4.69186	-2.6515	7/187	5341,7408,10094,10109,28988,55845,136319	PLEK,VASP,ARPC3,ARPC2,DBNL,BRK1,MTPN
6_Member	GO Biological Processes	GO:0030041	actin filament polymerization	-4.67695	-2.64114	7/188	5879,7408,10094,10109,28988,55845,136319	RAC1,VASP,ARPC3,ARPC2,DBNL,BRK1,MTPN
6_Member	GO Biological Processes	GO:0030832	regulation of actin filament length	-4.67695	-2.64114	7/188	5341,7408,10094,10109,28988,55845,136319	PLEK,VASP,ARPC3,ARPC2,DBNL,BRK1,MTPN
6_Member	GO Biological Processes	GO:0032273	positive regulation of protein polymerization	-4.43521	-2.45055	6/139	5879,7408,10094,10109,22919,55845	RAC1,VASP,ARPC3,ARPC2,MAPRE1,BRK1
6_Member	GO Biological Processes	GO:1902743	regulation of lamellipodium organization	-4.28737	-2.3281	4/46	3273,5879,10109,55845	HRG,RAC1,ARPC2,BRK1
6_Member	Canonical Pathways	M278	PID RAC1 PATHWAY	-4.01185	-2.10268	4/54	5879,10094,10109,55845	RAC1,ARPC3,ARPC2,BRK1
6_Member	GO Biological Processes	GO:0030833	regulation of actin filament polymerization	-3.93597	-2.03184	6/171	7408,10094,10109,28988,55845,136319	VASP,ARPC3,ARPC2,DBNL,BRK1,MTPN
6_Member	Reactome Gene Sets	R-HSA-9658195	Leishmania infection	-3.84242	-1.9482	7/255	718,2787,2791,5879,10094,10109,55845	C3,GNG5,GNG11,RAC1,ARPC3,ARPC2,BRK1
6_Member	Reactome Gene Sets	R-HSA-2029482	Regulation of actin dynamics for phagocytic cup formation	-3.80467	-1.9137	4/61	5879,10094,10109,55845	RAC1,ARPC3,ARPC2,BRK1
6_Member	Reactome Gene Sets	R-HSA-9664407	Parasite infection	-3.77718	-1.89264	4/62	5879,10094,10109,55845	RAC1,ARPC3,ARPC2,BRK1
6_Member	Reactome Gene Sets	R-HSA-9664417	Leishmania phagocytosis	-3.77718	-1.89264	4/62	5879,10094,10109,55845	RAC1,ARPC3,ARPC2,BRK1
6_Member	Reactome Gene Sets	R-HSA-9664422	FCGR3A-mediated phagocytosis	-3.77718	-1.89264	4/62	5879,10094,10109,55845	RAC1,ARPC3,ARPC2,BRK1
6_Member	GO Biological Processes	GO:0030032	lamellipodium assembly	-3.69751	-1.82245	4/65	3273,5879,10109,55845	HRG,RAC1,ARPC2,BRK1
6_Member	Canonical Pathways	M186	PID PDGFRB PATHWAY	-3.55705	-1.69583	5/129	5879,5908,10094,10109,55845	RAC1,RAP1B,ARPC3,ARPC2,BRK1
6_Member	GO Biological Processes	GO:0034314	Arp2/3 complex-mediated actin nucleation	-3.51491	-1.66771	3/38	10094,10109,55845	ARPC3,ARPC2,BRK1
6_Member	GO Biological Processes	GO:0010638	positive regulation of organelle organization	-3.44041	-1.62373	9/641	5341,5899,7168,7332,7408,10094,10109,22919,55845	PLEK,RALB,TPM1,UBE2L3,VASP,ARPC3,ARPC2,MAPRE1,BRK1
6_Member	KEGG Pathway	hsa05100	Bacterial invasion of epithelial cells	-3.43612	-1.59846	4/76	3611,5879,10094,10109	ILK,RAC1,ARPC3,ARPC2
6_Member	GO Biological Processes	GO:0002757	immune response-activating signal transduction	-3.41102	-1.59841	9/647	2243,2244,6280,7430,10094,10109,55845,57142,100423062	FGA,FGB,S100A9,EZR,ARPC3,ARPC2,BRK1,RTN4,IGLL5
6_Member	GO Biological Processes	GO:0030838	positive regulation of actin filament polymerization	-3.34856	-1.5532	4/103	7408,10094,10109,55845	VASP,ARPC3,ARPC2,BRK1
6_Member	GO Biological Processes	GO:0097581	lamellipodium organization	-3.2904	-1.46265	4/83	3273,5879,10109,55845	HRG,RAC1,ARPC2,BRK1
6_Member	GO Biological Processes	GO:0002764	immune response-regulating signaling pathway	-3.25069	-1.485	9/681	2243,2244,6280,7430,10094,10109,55845,57142,100423062	FGA,FGB,S100A9,EZR,ARPC3,ARPC2,BRK1,RTN4,IGLL5
6_Member	Reactome Gene Sets	R-HSA-2029480	Fcgamma receptor (FCGR) dependent phagocytosis	-3.23201	-1.41533	4/86	5879,10094,10109,55845	RAC1,ARPC3,ARPC2,BRK1
6_Member	KEGG Pathway	hsa04666	Fc gamma R-mediated phagocytosis	-3.13948	-1.34671	4/91	5879,7408,10094,10109	RAC1,VASP,ARPC3,ARPC2
6_Member	GO Biological Processes	GO:0045010	actin nucleation	-3.04049	-1.31577	3/55	10094,10109,55845	ARPC3,ARPC2,BRK1
6_Member	KEGG Pathway	hsa05130	Pathogenic Escherichia coli infection	-3.04049	-1.31577	3/55	7430,10094,10109	EZR,ARPC3,ARPC2
6_Member	Canonical Pathways	M164	PID ERBB1 DOWNSTREAM PATHWAY	-2.90755	-1.15899	4/105	5879,10094,10109,55845	RAC1,ARPC3,ARPC2,BRK1
6_Member	KEGG Pathway	hsa04810	Regulation of actin cytoskeleton	-2.59057	-0.889508	5/212	5879,7430,10094,10109,55845	RAC1,EZR,ARPC3,ARPC2,BRK1
7_Summary	GO Biological Processes	GO:0060627	regulation of vesicle-mediated transport	-10.506	-7.22827	18/544	344,345,348,718,720,721,1191,2243,2244,4218,5879,5899,5908,7430,8766,9230,10890,51762	APOC2,APOC3,APOE,C3,C4A,C4B,CLU,FGA,FGB,RAB8A,RAC1,RALB,RAP1B,EZR,RAB11A,RAB11B,RAB10,RAB8B
7_Member	GO Biological Processes	GO:0060627	regulation of vesicle-mediated transport	-10.506	-7.22827	18/544	344,345,348,718,720,721,1191,2243,2244,4218,5879,5899,5908,7430,8766,9230,10890,51762	APOC2,APOC3,APOE,C3,C4A,C4B,CLU,FGA,FGB,RAB8A,RAC1,RALB,RAP1B,EZR,RAB11A,RAB11B,RAB10,RAB8B
8_Summary	GO Biological Processes	GO:0090066	regulation of anatomical structure size	-8.05352	-5.30262	15/515	348,2243,2244,3611,5341,5879,7408,7430,8766,10094,10109,28988,55845,57142,136319,4830,4831,6280,51762,3273,7168,4218,10890	APOE,FGA,FGB,ILK,PLEK,RAC1,VASP,EZR,RAB11A,ARPC3,ARPC2,DBNL,BRK1,RTN4,MTPN,NME1,NME2,S100A9,RAB8B,HRG,TPM1,RAB8A,RAB10
8_Member	GO Biological Processes	GO:0090066	regulation of anatomical structure size	-8.05352	-5.30262	15/515	348,2243,2244,3611,5341,5879,7408,7430,8766,10094,10109,28988,55845,57142,136319	APOE,FGA,FGB,ILK,PLEK,RAC1,VASP,EZR,RAB11A,ARPC3,ARPC2,DBNL,BRK1,RTN4,MTPN
8_Member	GO Biological Processes	GO:0032535	regulation of cellular component size	-7.87371	-5.14566	13/378	348,3611,5341,5879,7408,7430,8766,10094,10109,28988,55845,57142,136319	APOE,ILK,PLEK,RAC1,VASP,EZR,RAB11A,ARPC3,ARPC2,DBNL,BRK1,RTN4,MTPN
8_Member	GO Biological Processes	GO:0008361	regulation of cell size	-6.93062	-4.41085	9/181	348,3611,5341,5879,7430,8766,28988,57142,136319	APOE,ILK,PLEK,RAC1,EZR,RAB11A,DBNL,RTN4,MTPN
8_Member	GO Biological Processes	GO:0031346	positive regulation of cell projection organization	-5.847	-3.54587	11/393	348,3611,4830,4831,5879,6280,8766,10109,28988,51762,55845	APOE,ILK,NME1,NME2,RAC1,S100A9,RAB11A,ARPC2,DBNL,RAB8B,BRK1
8_Member	GO Biological Processes	GO:0031344	regulation of cell projection organization	-5.4147	-3.20954	14/723	348,3273,3611,4830,4831,5879,6280,7430,8766,10109,28988,51762,55845,57142	APOE,HRG,ILK,NME1,NME2,RAC1,S100A9,EZR,RAB11A,ARPC2,DBNL,RAB8B,BRK1,RTN4
8_Member	GO Biological Processes	GO:0010770	positive regulation of cell morphogenesis involved in differentiation	-5.16775	-3.01421	7/158	2243,2244,3611,5879,8766,10109,28988	FGA,FGB,ILK,RAC1,RAB11A,ARPC2,DBNL
8_Member	GO Biological Processes	GO:0022604	regulation of cell morphogenesis	-5.04358	-2.85801	10/503	348,2243,2244,3611,7168,7430,8766,10109,28988,57142	APOE,FGA,FGB,ILK,TPM1,EZR,RAB11A,ARPC2,DBNL,RTN4
8_Member	GO Biological Processes	GO:0010769	regulation of cell morphogenesis involved in differentiation	-5.02951	-2.91452	9/307	348,2243,2244,3611,5879,8766,10109,28988,57142	APOE,FGA,FGB,ILK,RAC1,RAB11A,ARPC2,DBNL,RTN4
8_Member	GO Biological Processes	GO:0000904	cell morphogenesis involved in differentiation	-4.97279	-2.80597	12/756	348,2243,2244,3611,4218,7408,7430,8766,10109,10890,28988,57142	APOE,FGA,FGB,ILK,RAB8A,VASP,EZR,RAB11A,ARPC2,RAB10,DBNL,RTN4
8_Member	GO Biological Processes	GO:0120035	regulation of plasma membrane bounded cell projection organization	-4.78077	-2.71451	13/713	348,3273,3611,4830,4831,5879,6280,7430,8766,10109,28988,55845,57142	APOE,HRG,ILK,NME1,NME2,RAC1,S100A9,EZR,RAB11A,ARPC2,DBNL,BRK1,RTN4
8_Member	GO Biological Processes	GO:0030516	regulation of axon extension	-4.66379	-2.58273	5/97	348,3611,8766,28988,57142	APOE,ILK,RAB11A,DBNL,RTN4
8_Member	GO Biological Processes	GO:0007409	axonogenesis	-4.39874	-2.36967	9/478	348,3611,4218,7408,7430,8766,10890,28988,57142	APOE,ILK,RAB8A,VASP,EZR,RAB11A,RAB10,DBNL,RTN4
8_Member	GO Biological Processes	GO:0061387	regulation of extent of cell growth	-4.3816	-2.36134	5/111	348,3611,8766,28988,57142	APOE,ILK,RAB11A,DBNL,RTN4
8_Member	GO Biological Processes	GO:0010720	positive regulation of cell development	-4.35442	-2.38556	11/567	348,2243,2244,3611,4830,4831,5879,6280,8766,10109,28988	APOE,FGA,FGB,ILK,NME1,NME2,RAC1,S100A9,RAB11A,ARPC2,DBNL
8_Member	GO Biological Processes	GO:0048675	axon extension	-4.15209	-2.18129	5/124	348,3611,8766,28988,57142	APOE,ILK,RAB11A,DBNL,RTN4
8_Member	GO Biological Processes	GO:0061564	axon development	-4.0797	-2.12421	9/526	348,3611,4218,7408,7430,8766,10890,28988,57142	APOE,ILK,RAB8A,VASP,EZR,RAB11A,RAB10,DBNL,RTN4
8_Member	GO Biological Processes	GO:0048667	cell morphogenesis involved in neuron differentiation	-3.66164	-1.77998	9/598	348,3611,4218,7408,7430,8766,10890,28988,57142	APOE,ILK,RAB8A,VASP,EZR,RAB11A,RAB10,DBNL,RTN4
8_Member	GO Biological Processes	GO:1990138	neuron projection extension	-3.49926	-1.65583	5/171	348,3611,8766,28988,57142	APOE,ILK,RAB11A,DBNL,RTN4
8_Member	GO Biological Processes	GO:0010976	positive regulation of neuron projection development	-3.49286	-1.64651	7/291	348,3611,4830,4831,6280,8766,28988	APOE,ILK,NME1,NME2,S100A9,RAB11A,DBNL
8_Member	GO Biological Processes	GO:0048812	neuron projection morphogenesis	-3.358	-1.5581	9/658	348,3611,4218,7408,7430,8766,10890,28988,57142	APOE,ILK,RAB8A,VASP,EZR,RAB11A,RAB10,DBNL,RTN4
8_Member	GO Biological Processes	GO:0050770	regulation of axonogenesis	-3.34275	-1.54998	5/185	348,3611,8766,28988,57142	APOE,ILK,RAB11A,DBNL,RTN4
8_Member	GO Biological Processes	GO:0045773	positive regulation of axon extension	-3.29661	-1.52033	3/45	3611,8766,28988	ILK,RAB11A,DBNL
8_Member	GO Biological Processes	GO:0120039	plasma membrane bounded cell projection morphogenesis	-3.29213	-1.51833	9/672	348,3611,4218,7408,7430,8766,10890,28988,57142	APOE,ILK,RAB8A,VASP,EZR,RAB11A,RAB10,DBNL,RTN4
8_Member	GO Biological Processes	GO:0048858	cell projection morphogenesis	-3.27362	-1.50352	9/676	348,3611,4218,7408,7430,8766,10890,28988,57142	APOE,ILK,RAB8A,VASP,EZR,RAB11A,RAB10,DBNL,RTN4
8_Member	GO Biological Processes	GO:0001558	regulation of cell growth	-3.23599	-1.41657	8/421	348,3273,3611,6280,8766,28988,57142,136319	APOE,HRG,ILK,S100A9,RAB11A,DBNL,RTN4,MTPN
8_Member	GO Biological Processes	GO:0032990	cell part morphogenesis	-3.18315	-1.43458	9/696	348,3611,4218,7408,7430,8766,10890,28988,57142	APOE,ILK,RAB8A,VASP,EZR,RAB11A,RAB10,DBNL,RTN4
8_Member	GO Biological Processes	GO:0030307	positive regulation of cell growth	-2.97776	-1.21254	5/173	3611,6280,8766,28988,136319	ILK,S100A9,RAB11A,DBNL,MTPN
8_Member	GO Biological Processes	GO:0060560	developmental growth involved in morphogenesis	-2.87638	-1.18076	5/235	348,3611,8766,28988,57142	APOE,ILK,RAB11A,DBNL,RTN4
8_Member	GO Biological Processes	GO:0048638	regulation of developmental growth	-2.87455	-1.18076	6/350	348,3611,7430,8766,28988,57142	APOE,ILK,EZR,RAB11A,DBNL,RTN4
8_Member	GO Biological Processes	GO:0048588	developmental cell growth	-2.86824	-1.17752	5/236	348,3611,8766,28988,57142	APOE,ILK,RAB11A,DBNL,RTN4
8_Member	GO Biological Processes	GO:0045927	positive regulation of growth	-2.83604	-1.09558	6/276	3611,6280,7430,8766,28988,136319	ILK,S100A9,EZR,RAB11A,DBNL,MTPN
8_Member	GO Biological Processes	GO:0016049	cell growth	-2.81778	-1.13616	7/490	348,3273,3611,6280,8766,28988,57142	APOE,HRG,ILK,S100A9,RAB11A,DBNL,RTN4
8_Member	GO Biological Processes	GO:0045666	positive regulation of neuron differentiation	-2.81331	-1.07849	7/380	348,3611,4830,4831,6280,8766,28988	APOE,ILK,NME1,NME2,S100A9,RAB11A,DBNL
8_Member	GO Biological Processes	GO:0010975	regulation of neuron projection development	-2.70972	-1.04092	7/512	348,3611,4830,6280,8766,28988,57142	APOE,ILK,NME1,S100A9,RAB11A,DBNL,RTN4
8_Member	GO Biological Processes	GO:1900006	positive regulation of dendrite development	-2.63499	-0.980522	3/76	348,3611,28988	APOE,ILK,DBNL
8_Member	GO Biological Processes	GO:0040008	regulation of growth	-2.59863	-0.947915	8/686	348,3273,3611,6280,7430,8766,28988,57142	APOE,HRG,ILK,S100A9,EZR,RAB11A,DBNL,RTN4
8_Member	GO Biological Processes	GO:0050772	positive regulation of axonogenesis	-2.45446	-0.828202	3/88	3611,8766,28988	ILK,RAB11A,DBNL
8_Member	GO Biological Processes	GO:0048639	positive regulation of developmental growth	-2.37945	-0.76621	4/189	3611,7430,8766,28988	ILK,EZR,RAB11A,DBNL
8_Member	GO Biological Processes	GO:0050769	positive regulation of neurogenesis	-2.23458	-0.585721	7/484	348,3611,4830,4831,6280,8766,28988	APOE,ILK,NME1,NME2,S100A9,RAB11A,DBNL
8_Member	GO Biological Processes	GO:0045664	regulation of neuron differentiation	-2.08619	-0.540142	7/667	348,3611,4830,6280,8766,28988,57142	APOE,ILK,NME1,S100A9,RAB11A,DBNL,RTN4
9_Summary	GO Biological Processes	GO:0006898	receptor-mediated endocytosis	-7.60903	-4.94314	12/327	344,345,348,718,1191,3240,3250,5879,6288,7430,10525,28988,6280	APOC2,APOC3,APOE,C3,CLU,HP,HPR,RAC1,SAA1,EZR,HYOU1,DBNL,S100A9
9_Member	GO Biological Processes	GO:0006898	receptor-mediated endocytosis	-7.60903	-4.94314	12/327	344,345,348,718,1191,3240,3250,5879,6288,7430,10525,28988	APOC2,APOC3,APOE,C3,CLU,HP,HPR,RAC1,SAA1,EZR,HYOU1,DBNL
9_Member	Reactome Gene Sets	R-HSA-2173782	Binding and Uptake of Ligands by Scavenger Receptors	-6.47877	-3.84091	5/42	348,3240,3250,6288,10525	APOE,HP,HPR,SAA1,HYOU1
9_Member	GO Biological Processes	GO:0098869	cellular oxidant detoxification	-2.26326	-0.682139	3/103	348,3240,6280	APOE,HP,S100A9
9_Member	GO Biological Processes	GO:1990748	cellular detoxification	-2.14157	-0.585888	3/114	348,3240,6280	APOE,HP,S100A9
10_Summary	GO Biological Processes	GO:0006953	acute-phase response	-7.21443	-4.5943	6/47	325,3240,3700,5004,5265,6288	APCS,HP,ITIH4,ORM1,SERPINA1,SAA1
10_Member	GO Biological Processes	GO:0006953	acute-phase response	-7.21443	-4.5943	6/47	325,3240,3700,5004,5265,6288	APCS,HP,ITIH4,ORM1,SERPINA1,SAA1
11_Summary	GO Biological Processes	GO:0019730	antimicrobial humoral response	-7.11152	-4.53277	8/123	1191,2243,2244,3133,3273,6280,8349,85236,3240,51552,100423062,718,721,6352	CLU,FGA,FGB,HLA-E,HRG,S100A9,H2BC21,H2BC12,HP,RAB14,IGLL5,C3,C4B,CCL5
11_Member	GO Biological Processes	GO:0019730	antimicrobial humoral response	-7.11152	-4.53277	8/123	1191,2243,2244,3133,3273,6280,8349,85236	CLU,FGA,FGB,HLA-E,HRG,S100A9,H2BC21,H2BC12
11_Member	GO Biological Processes	GO:0019731	antibacterial humoral response	-5.68598	-3.41609	5/47	2243,2244,3133,8349,85236	FGA,FGB,HLA-E,H2BC21,H2BC12
11_Member	GO Biological Processes	GO:0042742	defense response to bacterium	-4.63797	-2.60889	9/344	2243,2244,3133,3240,6280,8349,51552,85236,100423062	FGA,FGB,HLA-E,HP,S100A9,H2BC21,RAB14,H2BC12,IGLL5
11_Member	GO Biological Processes	GO:0009617	response to bacterium	-4.02227	-2.10971	12/729	718,721,2243,2244,3133,3240,6280,6352,8349,51552,85236,100423062	C3,C4B,FGA,FGB,HLA-E,HP,S100A9,CCL5,H2BC21,RAB14,H2BC12,IGLL5
11_Member	GO Biological Processes	GO:0061844	antimicrobial humoral immune response mediated by antimicrobial peptide	-3.50312	-1.6523	4/73	3273,6280,8349,85236	HRG,S100A9,H2BC21,H2BC12
11_Member	GO Biological Processes	GO:0098542	defense response to other organism	-3.4931	-1.64651	10/596	2243,2244,3133,3240,3273,6280,8349,51552,85236,100423062	FGA,FGB,HLA-E,HP,HRG,S100A9,H2BC21,RAB14,H2BC12,IGLL5
12_Summary	GO Biological Processes	GO:0009306	protein secretion	-7.04972	-4.4788	15/614	348,727,2243,2244,3133,4218,5004,5341,5879,6288,6352,7430,9230,10890,51762,7332,8766,29969,1509,5899,5908	APOE,C5,FGA,FGB,HLA-E,RAB8A,ORM1,PLEK,RAC1,SAA1,CCL5,EZR,RAB11B,RAB10,RAB8B,UBE2L3,RAB11A,MDFIC,CTSD,RALB,RAP1B
12_Member	GO Biological Processes	GO:0009306	protein secretion	-7.04972	-4.4788	15/614	348,727,2243,2244,3133,4218,5004,5341,5879,6288,6352,7430,9230,10890,51762	APOE,C5,FGA,FGB,HLA-E,RAB8A,ORM1,PLEK,RAC1,SAA1,CCL5,EZR,RAB11B,RAB10,RAB8B
12_Member	GO Biological Processes	GO:0002790	peptide secretion	-6.73979	-4.25953	15/649	348,727,2243,2244,3133,4218,5004,5341,5879,6288,6352,7430,9230,10890,51762	APOE,C5,FGA,FGB,HLA-E,RAB8A,ORM1,PLEK,RAC1,SAA1,CCL5,EZR,RAB11B,RAB10,RAB8B
12_Member	GO Biological Processes	GO:0090087	regulation of peptide transport	-5.91189	-3.59711	15/755	348,727,2243,2244,3133,4218,5004,5879,6288,6352,7332,7430,8766,29969,51762	APOE,C5,FGA,FGB,HLA-E,RAB8A,ORM1,RAC1,SAA1,CCL5,UBE2L3,EZR,RAB11A,MDFIC,RAB8B
12_Member	GO Biological Processes	GO:0070201	regulation of establishment of protein localization	-5.79241	-3.50268	15/772	348,727,1509,2243,2244,3133,4218,5004,5879,6288,6352,7332,7430,8766,29969	APOE,C5,CTSD,FGA,FGB,HLA-E,RAB8A,ORM1,RAC1,SAA1,CCL5,UBE2L3,EZR,RAB11A,MDFIC
12_Member	GO Biological Processes	GO:1903530	regulation of secretion by cell	-5.75788	-3.47621	15/777	348,727,2243,2244,3133,4218,5004,5879,5899,5908,6288,6352,7430,10890,51762	APOE,C5,FGA,FGB,HLA-E,RAB8A,ORM1,RAC1,RALB,RAP1B,SAA1,CCL5,EZR,RAB10,RAB8B
12_Member	GO Biological Processes	GO:0051223	regulation of protein transport	-5.40093	-3.20239	14/725	348,727,2243,2244,3133,4218,5004,5879,6288,6352,7332,7430,8766,29969	APOE,C5,FGA,FGB,HLA-E,RAB8A,ORM1,RAC1,SAA1,CCL5,UBE2L3,EZR,RAB11A,MDFIC
12_Member	GO Biological Processes	GO:0002793	positive regulation of peptide secretion	-5.16839	-3.01421	9/295	727,2243,2244,3133,5004,5879,6288,7430,51762	C5,FGA,FGB,HLA-E,ORM1,RAC1,SAA1,EZR,RAB8B
12_Member	GO Biological Processes	GO:0002791	regulation of peptide secretion	-4.69669	-2.65405	11/520	348,727,2243,2244,3133,5004,5879,6288,6352,7430,51762	APOE,C5,FGA,FGB,HLA-E,ORM1,RAC1,SAA1,CCL5,EZR,RAB8B
12_Member	GO Biological Processes	GO:0050714	positive regulation of protein secretion	-4.51179	-2.5149	8/274	727,2243,2244,3133,5004,5879,6288,7430	C5,FGA,FGB,HLA-E,ORM1,RAC1,SAA1,EZR
12_Member	GO Biological Processes	GO:0050708	regulation of protein secretion	-4.16732	-2.23383	10/492	348,727,2243,2244,3133,5004,5879,6288,6352,7430	APOE,C5,FGA,FGB,HLA-E,ORM1,RAC1,SAA1,CCL5,EZR
12_Member	GO Biological Processes	GO:1903532	positive regulation of secretion by cell	-4.08171	-2.1588	9/406	727,2243,2244,3133,5004,5879,6288,7430,51762	C5,FGA,FGB,HLA-E,ORM1,RAC1,SAA1,EZR,RAB8B
12_Member	GO Biological Processes	GO:0051222	positive regulation of protein transport	-3.92368	-2.02288	9/426	727,2243,2244,3133,5004,5879,6288,7332,7430	C5,FGA,FGB,HLA-E,ORM1,RAC1,SAA1,UBE2L3,EZR
12_Member	GO Biological Processes	GO:0051047	positive regulation of secretion	-3.84801	-1.95215	9/436	727,2243,2244,3133,5004,5879,6288,7430,51762	C5,FGA,FGB,HLA-E,ORM1,RAC1,SAA1,EZR,RAB8B
12_Member	GO Biological Processes	GO:1904951	positive regulation of establishment of protein localization	-3.64698	-1.77658	9/464	727,2243,2244,3133,5004,5879,6288,7332,7430	C5,FGA,FGB,HLA-E,ORM1,RAC1,SAA1,UBE2L3,EZR
12_Member	GO Biological Processes	GO:0050707	regulation of cytokine secretion	-2.11476	-0.562814	4/225	727,5004,6288,7430	C5,ORM1,SAA1,EZR
13_Summary	Reactome Gene Sets	R-HSA-8963898	Plasma lipoprotein assembly	-6.41171	-3.79157	4/18	2,344,345,348,1191,718,7276,720,721,5879,3273,5341,57142,3008,22919,136319,51552,6352	A2M,APOC2,APOC3,APOE,CLU,C3,TTR,C4A,C4B,RAC1,HRG,PLEK,RTN4,H1-4,MAPRE1,MTPN,RAB14,CCL5
13_Member	Reactome Gene Sets	R-HSA-8963898	Plasma lipoprotein assembly	-6.41171	-3.79157	4/18	2,344,345,348	A2M,APOC2,APOC3,APOE
13_Member	GO Biological Processes	GO:0043691	reverse cholesterol transport	-5.77626	-3.49057	4/20	344,345,348,1191	APOC2,APOC3,APOE,CLU
13_Member	GO Biological Processes	GO:0034371	chylomicron remodeling	-5.48541	-3.1749	3/9	344,345,348	APOC2,APOC3,APOE
13_Member	GO Biological Processes	GO:0034382	chylomicron remnant clearance	-5.48541	-3.1749	3/9	344,345,348	APOC2,APOC3,APOE
13_Member	GO Biological Processes	GO:0071830	triglyceride-rich lipoprotein particle clearance	-5.48541	-3.1749	3/9	344,345,348	APOC2,APOC3,APOE
13_Member	Reactome Gene Sets	R-HSA-8963888	Chylomicron assembly	-5.48541	-3.1749	3/9	344,345,348	APOC2,APOC3,APOE
13_Member	Reactome Gene Sets	R-HSA-8963901	Chylomicron remodeling	-5.48541	-3.1749	3/9	344,345,348	APOC2,APOC3,APOE
13_Member	GO Biological Processes	GO:0034378	chylomicron assembly	-5.33159	-3.06258	3/10	344,345,348	APOC2,APOC3,APOE
13_Member	GO Biological Processes	GO:0034447	very-low-density lipoprotein particle clearance	-5.33159	-3.06258	3/10	344,345,348	APOC2,APOC3,APOE
13_Member	Reactome Gene Sets	R-HSA-8964058	HDL remodeling	-5.33159	-3.06258	3/10	344,345,348	APOC2,APOC3,APOE
13_Member	GO Biological Processes	GO:0034372	very-low-density lipoprotein particle remodeling	-5.19437	-2.96162	3/11	344,345,348	APOC2,APOC3,APOE
13_Member	GO Biological Processes	GO:0033700	phospholipid efflux	-5.07051	-2.87976	3/12	344,345,348	APOC2,APOC3,APOE
13_Member	GO Biological Processes	GO:0034370	triglyceride-rich lipoprotein particle remodeling	-4.95765	-2.79691	3/13	344,345,348	APOC2,APOC3,APOE
13_Member	GO Biological Processes	GO:0090207	regulation of triglyceride metabolic process	-4.91817	-2.76638	4/41	344,345,348,718	APOC2,APOC3,APOE,C3
13_Member	Reactome Gene Sets	R-HSA-975634	Retinoid metabolism and transport	-4.83458	-2.69732	4/43	344,345,348,7276	APOC2,APOC3,APOE,TTR
13_Member	Reactome Gene Sets	R-HSA-6806667	Metabolism of fat-soluble vitamins	-4.67918	-2.59307	4/47	344,345,348,7276	APOC2,APOC3,APOE,TTR
13_Member	GO Biological Processes	GO:0034375	high-density lipoprotein particle remodeling	-4.58584	-2.51471	3/17	344,345,348	APOC2,APOC3,APOE
13_Member	GO Biological Processes	GO:0034384	high-density lipoprotein particle clearance	-4.58584	-2.51471	3/17	344,345,348	APOC2,APOC3,APOE
13_Member	GO Biological Processes	GO:0030100	regulation of endocytosis	-4.37995	-2.40719	8/286	344,345,348,718,720,721,1191,5879	APOC2,APOC3,APOE,C3,C4A,C4B,CLU,RAC1
13_Member	Reactome Gene Sets	R-HSA-174824	Plasma lipoprotein assembly, remodeling, and clearance	-4.01875	-2.07071	4/69	2,344,345,348	A2M,APOC2,APOC3,APOE
13_Member	GO Biological Processes	GO:0034368	protein-lipid complex remodeling	-3.86856	-1.95257	3/29	344,345,348	APOC2,APOC3,APOE
13_Member	GO Biological Processes	GO:0034369	plasma lipoprotein particle remodeling	-3.86856	-1.95257	3/29	344,345,348	APOC2,APOC3,APOE
13_Member	GO Biological Processes	GO:0034377	plasma lipoprotein particle assembly	-3.86856	-1.95257	3/29	344,345,348	APOC2,APOC3,APOE
13_Member	GO Biological Processes	GO:0048259	regulation of receptor-mediated endocytosis	-3.86162	-1.96412	5/111	344,345,718,1191,5879	APOC2,APOC3,C3,CLU,RAC1
13_Member	GO Biological Processes	GO:0034367	protein-containing complex remodeling	-3.82388	-1.92141	3/30	344,345,348	APOC2,APOC3,APOE
13_Member	Reactome Gene Sets	R-HSA-8963899	Plasma lipoprotein remodeling	-3.82388	-1.92141	3/30	344,345,348	APOC2,APOC3,APOE
13_Member	GO Biological Processes	GO:0010543	regulation of platelet activation	-3.73908	-1.84486	3/32	348,3273,5341	APOE,HRG,PLEK
13_Member	GO Biological Processes	GO:0065005	protein-lipid complex assembly	-3.69877	-1.81263	3/33	344,345,348	APOC2,APOC3,APOE
13_Member	GO Biological Processes	GO:0055090	acylglycerol homeostasis	-3.51491	-1.66771	3/38	344,345,348	APOC2,APOC3,APOE
13_Member	GO Biological Processes	GO:0070328	triglyceride homeostasis	-3.51491	-1.66771	3/38	344,345,348	APOC2,APOC3,APOE
13_Member	Reactome Gene Sets	R-HSA-2187338	Visual phototransduction	-3.34856	-1.5532	4/103	344,345,348,7276	APOC2,APOC3,APOE,TTR
13_Member	GO Biological Processes	GO:0001523	retinoid metabolic process	-3.33266	-1.54317	4/104	344,345,348,7276	APOC2,APOC3,APOE,TTR
13_Member	GO Biological Processes	GO:0006641	triglyceride metabolic process	-3.33266	-1.54317	4/104	344,345,348,718	APOC2,APOC3,APOE,C3
13_Member	GO Biological Processes	GO:0071827	plasma lipoprotein particle organization	-3.24083	-1.485	3/47	344,345,348	APOC2,APOC3,APOE
13_Member	GO Biological Processes	GO:0016101	diterpenoid metabolic process	-3.24062	-1.485	4/110	344,345,348,7276	APOC2,APOC3,APOE,TTR
13_Member	GO Biological Processes	GO:0071825	protein-lipid complex subunit organization	-3.13647	-1.39486	3/51	344,345,348	APOC2,APOC3,APOE
13_Member	GO Biological Processes	GO:0006721	terpenoid metabolic process	-3.09877	-1.36173	4/120	344,345,348,7276	APOC2,APOC3,APOE,TTR
13_Member	GO Biological Processes	GO:0030301	cholesterol transport	-2.98624	-1.21858	4/100	344,345,348,1191	APOC2,APOC3,APOE,CLU
13_Member	GO Biological Processes	GO:0006638	neutral lipid metabolic process	-2.98178	-1.26795	4/129	344,345,348,718	APOC2,APOC3,APOE,C3
13_Member	GO Biological Processes	GO:0006639	acylglycerol metabolic process	-2.98178	-1.26795	4/129	344,345,348,718	APOC2,APOC3,APOE,C3
13_Member	GO Biological Processes	GO:0033344	cholesterol efflux	-2.95167	-1.24535	3/59	344,345,348	APOC2,APOC3,APOE
13_Member	GO Biological Processes	GO:0006720	isoprenoid metabolic process	-2.85044	-1.16264	4/140	344,345,348,7276	APOC2,APOC3,APOE,TTR
13_Member	GO Biological Processes	GO:0032371	regulation of sterol transport	-2.84929	-1.16264	3/64	344,345,348	APOC2,APOC3,APOE
13_Member	GO Biological Processes	GO:0032374	regulation of cholesterol transport	-2.84929	-1.16264	3/64	344,345,348	APOC2,APOC3,APOE
13_Member	GO Biological Processes	GO:0015918	sterol transport	-2.80413	-1.07048	4/112	344,345,348,1191	APOC2,APOC3,APOE,CLU
13_Member	GO Biological Processes	GO:0034381	plasma lipoprotein particle clearance	-2.77337	-1.09871	3/68	344,345,348	APOC2,APOC3,APOE
13_Member	GO Biological Processes	GO:0055088	lipid homeostasis	-2.67858	-1.01557	4/156	344,345,348,57142	APOC2,APOC3,APOE,RTN4
13_Member	GO Biological Processes	GO:0051129	negative regulation of cellular component organization	-2.67457	-0.962916	10/764	344,345,348,1191,3008,3273,5879,22919,57142,136319	APOC2,APOC3,APOE,CLU,H1-4,HRG,RAC1,MAPRE1,RTN4,MTPN
13_Member	GO Biological Processes	GO:0015914	phospholipid transport	-2.66806	-1.00696	3/74	344,345,348	APOC2,APOC3,APOE
13_Member	GO Biological Processes	GO:1905952	regulation of lipid localization	-2.63869	-0.981451	4/160	344,345,348,718	APOC2,APOC3,APOE,C3
13_Member	GO Biological Processes	GO:0046486	glycerolipid metabolic process	-2.49932	-0.864246	6/416	344,345,348,718,5341,51552	APOC2,APOC3,APOE,C3,PLEK,RAB14
13_Member	Reactome Gene Sets	R-HSA-196854	Metabolism of vitamins and cofactors	-2.37945	-0.76621	4/189	344,345,348,7276	APOC2,APOC3,APOE,TTR
13_Member	GO Biological Processes	GO:0045833	negative regulation of lipid metabolic process	-2.36112	-0.750439	3/95	344,345,348	APOC2,APOC3,APOE
13_Member	GO Biological Processes	GO:0042632	cholesterol homeostasis	-2.31111	-0.713041	3/99	344,345,348	APOC2,APOC3,APOE
13_Member	GO Biological Processes	GO:0060191	regulation of lipase activity	-2.31111	-0.713041	3/99	344,345,6352	APOC2,APOC3,CCL5
13_Member	GO Biological Processes	GO:0055092	sterol homeostasis	-2.29895	-0.709815	3/100	344,345,348	APOC2,APOC3,APOE
13_Member	GO Biological Processes	GO:0046890	regulation of lipid biosynthetic process	-2.27761	-0.692707	4/202	344,345,348,718	APOC2,APOC3,APOE,C3
13_Member	GO Biological Processes	GO:0097006	regulation of plasma lipoprotein particle levels	-2.27503	-0.691518	3/102	344,345,348	APOC2,APOC3,APOE
13_Member	GO Biological Processes	GO:0015748	organophosphate ester transport	-2.24009	-0.666063	3/105	344,345,348	APOC2,APOC3,APOE
13_Member	GO Biological Processes	GO:0062014	negative regulation of small molecule metabolic process	-2.17342	-0.611712	3/111	345,348,5341	APOC3,APOE,PLEK
13_Member	GO Biological Processes	GO:0032368	regulation of lipid transport	-2.02286	-0.484793	3/126	344,345,348	APOC2,APOC3,APOE
14_Summary	GO Biological Processes	GO:0006826	iron ion transport	-6.22561	-3.69183	4/66	1356,9230,9843,341208,348	CP,RAB11B,HEPH,HEPHL1,APOE
14_Member	GO Biological Processes	GO:0006826	iron ion transport	-6.22561	-3.69183	4/66	1356,9230,9843,341208	CP,RAB11B,HEPH,HEPHL1
14_Member	GO Biological Processes	GO:0006825	copper ion transport	-6.1132	-3.60027	3/18	1356,9843,341208	CP,HEPH,HEPHL1
14_Member	GO Biological Processes	GO:0000041	transition metal ion transport	-5.27345	-3.0188	4/114	1356,9230,9843,341208	CP,RAB11B,HEPH,HEPHL1
14_Member	GO Biological Processes	GO:0006879	cellular iron ion homeostasis	-4.43921	-2.39656	3/63	1356,9843,341208	CP,HEPH,HEPHL1
14_Member	GO Biological Processes	GO:0055072	iron ion homeostasis	-4.12846	-2.16346	3/80	1356,9843,341208	CP,HEPH,HEPHL1
14_Member	GO Biological Processes	GO:0046916	cellular transition metal ion homeostasis	-3.71784	-1.82687	3/110	1356,9843,341208	CP,HEPH,HEPHL1
14_Member	GO Biological Processes	GO:0055076	transition metal ion homeostasis	-3.48476	-1.64926	3/132	1356,9843,341208	CP,HEPH,HEPHL1
14_Member	GO Biological Processes	GO:0006875	cellular metal ion homeostasis	-2.52597	-0.887198	4/596	348,1356,9843,341208	APOE,CP,HEPH,HEPHL1
14_Member	GO Biological Processes	GO:0055065	metal ion homeostasis	-2.34899	-0.741107	4/668	348,1356,9843,341208	APOE,CP,HEPH,HEPHL1
14_Member	GO Biological Processes	GO:0030003	cellular cation homeostasis	-2.33979	-0.734178	4/672	348,1356,9843,341208	APOE,CP,HEPH,HEPHL1
14_Member	GO Biological Processes	GO:0006873	cellular ion homeostasis	-2.31034	-0.713041	4/685	348,1356,9843,341208	APOE,CP,HEPH,HEPHL1
14_Member	GO Biological Processes	GO:0055080	cation homeostasis	-2.17608	-0.612088	4/748	348,1356,9843,341208	APOE,CP,HEPH,HEPHL1
14_Member	GO Biological Processes	GO:0098771	inorganic ion homeostasis	-2.15397	-0.594534	4/759	348,1356,9843,341208	APOE,CP,HEPH,HEPHL1
15_Summary	GO Biological Processes	GO:0097242	amyloid-beta clearance	-6.21711	-3.84249	5/37	348,718,1191,8766,9230,136319,4830,5899,22919,1509,6280,54205	APOE,C3,CLU,RAB11A,RAB11B,MTPN,NME1,RALB,MAPRE1,CTSD,S100A9,CYCS
15_Member	GO Biological Processes	GO:0097242	amyloid-beta clearance	-6.21711	-3.84249	5/37	348,718,1191,8766,9230	APOE,C3,CLU,RAB11A,RAB11B
15_Member	GO Biological Processes	GO:1902904	negative regulation of supramolecular fiber organization	-3.2972	-1.52033	3/153	348,1191,136319	APOE,CLU,MTPN
15_Member	GO Biological Processes	GO:0051099	positive regulation of binding	-2.49851	-0.864246	4/175	348,4830,5899,22919	APOE,NME1,RALB,MAPRE1
15_Member	GO Biological Processes	GO:0032092	positive regulation of protein binding	-2.48262	-0.854597	3/86	348,5899,22919	APOE,RALB,MAPRE1
15_Member	GO Biological Processes	GO:0045862	positive regulation of proteolysis	-2.21067	-0.56274	6/370	348,718,1191,1509,6280,54205	APOE,C3,CLU,CTSD,S100A9,CYCS
15_Member	GO Biological Processes	GO:0031331	positive regulation of cellular catabolic process	-2.1988	-0.630968	3/372	348,1191,5899	APOE,CLU,RALB
15_Member	GO Biological Processes	GO:0009896	positive regulation of catabolic process	-2.01017	-0.472816	3/436	348,1191,5899	APOE,CLU,RALB
16_Summary	GO Biological Processes	GO:0120031	plasma membrane bounded cell projection assembly	-6.07609	-3.57652	12/590	3273,4218,5908,7430,8766,10109,22919,28988,30845,51762,55845,83658,1984,5899,348,5879,54205,4900,8676	HRG,RAB8A,RAP1B,EZR,RAB11A,ARPC2,MAPRE1,DBNL,EHD3,RAB8B,BRK1,DYNLRB1,EIF5A,RALB,APOE,RAC1,CYCS,NRGN,STX11
16_Member	GO Biological Processes	GO:0120031	plasma membrane bounded cell projection assembly	-6.07609	-3.57652	12/590	3273,4218,5908,7430,8766,10109,22919,28988,30845,51762,55845,83658	HRG,RAB8A,RAP1B,EZR,RAB11A,ARPC2,MAPRE1,DBNL,EHD3,RAB8B,BRK1,DYNLRB1
16_Member	GO Biological Processes	GO:0030031	cell projection assembly	-5.97705	-3.533	12/603	3273,4218,5908,7430,8766,10109,22919,28988,30845,51762,55845,83658	HRG,RAB8A,RAP1B,EZR,RAB11A,ARPC2,MAPRE1,DBNL,EHD3,RAB8B,BRK1,DYNLRB1
16_Member	GO Biological Processes	GO:0031503	protein-containing complex localization	-3.30537	-1.52534	6/289	1984,4218,5899,7430,8766,83658	EIF5A,RAB8A,RALB,EZR,RAB11A,DYNLRB1
16_Member	GO Biological Processes	GO:0048168	regulation of neuronal synaptic plasticity	-3.11174	-1.37242	3/52	348,4218,8766	APOE,RAB8A,RAB11A
16_Member	KEGG Pathway	hsa04972	Pancreatic secretion	-3.05238	-1.27235	4/96	4218,5879,5908,8766	RAB8A,RAC1,RAP1B,RAB11A
16_Member	GO Biological Processes	GO:0060271	cilium assembly	-2.63235	-0.978821	6/391	4218,8766,22919,30845,51762,83658	RAB8A,RAB11A,MAPRE1,EHD3,RAB8B,DYNLRB1
16_Member	GO Biological Processes	GO:0044782	cilium organization	-2.53556	-0.894061	6/409	4218,8766,22919,30845,51762,83658	RAB8A,RAB11A,MAPRE1,EHD3,RAB8B,DYNLRB1
16_Member	Reactome Gene Sets	R-HSA-1852241	Organelle biogenesis and maintenance	-2.44217	-0.816787	5/296	4218,8766,22919,54205,83658	RAB8A,RAB11A,MAPRE1,CYCS,DYNLRB1
16_Member	GO Biological Processes	GO:0048167	regulation of synaptic plasticity	-2.37945	-0.76621	4/189	348,4218,4900,8766	APOE,RAB8A,NRGN,RAB11A
16_Member	Reactome Gene Sets	R-HSA-5620912	Anchoring of the basal body to the plasma membrane	-2.3234	-0.721131	3/98	4218,8766,22919	RAB8A,RAB11A,MAPRE1
16_Member	Reactome Gene Sets	R-HSA-5617833	Cilium Assembly	-2.28517	-0.699264	4/201	4218,8766,22919,83658	RAB8A,RAB11A,MAPRE1,DYNLRB1
16_Member	GO Biological Processes	GO:0099003	vesicle-mediated transport in synapse	-2.1901	-0.623046	4/214	4218,5908,8676,8766	RAB8A,RAP1B,STX11,RAB11A
17_Summary	Reactome Gene Sets	R-HSA-418594	G alpha (i) signalling events	-5.85669	-3.43762	10/407	344,345,348,718,727,2787,2791,6288,6352,7276,3107,3133,54205,3273,5355,6280,7408,7430,51411,5879	APOC2,APOC3,APOE,C3,C5,GNG5,GNG11,SAA1,CCL5,TTR,HLA-C,HLA-E,CYCS,HRG,PLP2,S100A9,VASP,EZR,BIN2,RAC1
17_Member	Reactome Gene Sets	R-HSA-418594	G alpha (i) signalling events	-5.85669	-3.43762	10/407	344,345,348,718,727,2787,2791,6288,6352,7276	APOC2,APOC3,APOE,C3,C5,GNG5,GNG11,SAA1,CCL5,TTR
17_Member	KEGG Pathway	hsa05168	Herpes simplex infection	-3.74967	-1.86831	6/185	718,727,3107,3133,6352,54205	C3,C5,HLA-C,HLA-E,CCL5,CYCS
17_Member	GO Biological Processes	GO:0048246	macrophage chemotaxis	-3.51491	-1.66771	3/38	727,6288,6352	C5,SAA1,CCL5
17_Member	GO Biological Processes	GO:0006935	chemotaxis	-3.40129	-1.59004	9/649	727,3273,5355,6280,6288,6352,7408,7430,51411	C5,HRG,PLP2,S100A9,SAA1,CCL5,VASP,EZR,BIN2
17_Member	GO Biological Processes	GO:0042330	taxis	-3.39161	-1.58572	9/651	727,3273,5355,6280,6288,6352,7408,7430,51411	C5,HRG,PLP2,S100A9,SAA1,CCL5,VASP,EZR,BIN2
17_Member	GO Biological Processes	GO:0060326	cell chemotaxis	-3.37898	-1.5456	7/304	727,3273,5879,6280,6288,6352,51411	C5,HRG,RAC1,S100A9,SAA1,CCL5,BIN2
17_Member	GO Biological Processes	GO:1905517	macrophage migration	-3.08751	-1.35387	3/53	727,6288,6352	C5,SAA1,CCL5
17_Member	GO Biological Processes	GO:0030593	neutrophil chemotaxis	-2.98624	-1.21858	4/100	5879,6280,6288,6352	RAC1,S100A9,SAA1,CCL5
17_Member	GO Biological Processes	GO:1990266	neutrophil migration	-2.73457	-1.01316	4/117	5879,6280,6288,6352	RAC1,S100A9,SAA1,CCL5
17_Member	GO Biological Processes	GO:0071621	granulocyte chemotaxis	-2.70768	-0.991719	4/119	5879,6280,6288,6352	RAC1,S100A9,SAA1,CCL5
17_Member	GO Biological Processes	GO:0097529	myeloid leukocyte migration	-2.59057	-0.889508	5/212	727,5879,6280,6288,6352	C5,RAC1,S100A9,SAA1,CCL5
17_Member	GO Biological Processes	GO:0030595	leukocyte chemotaxis	-2.49629	-0.808624	5/223	727,5879,6280,6288,6352	C5,RAC1,S100A9,SAA1,CCL5
17_Member	Reactome Gene Sets	R-HSA-375276	Peptide ligand-binding receptors	-2.28517	-0.699264	4/201	718,727,6288,6352	C3,C5,SAA1,CCL5
17_Member	Reactome Gene Sets	R-HSA-500792	GPCR ligand binding	-2.25632	-0.676786	6/467	718,727,2787,2791,6288,6352	C3,C5,GNG5,GNG11,SAA1,CCL5
18_Summary	GO Biological Processes	GO:0006909	phagocytosis	-5.2601	-3.01287	9/372	718,720,721,10094,10109,51411,51552,55845,100423062,5879	C3,C4A,C4B,ARPC3,ARPC2,BIN2,RAB14,BRK1,IGLL5,RAC1
18_Member	GO Biological Processes	GO:0006909	phagocytosis	-5.2601	-3.01287	9/372	718,720,721,10094,10109,51411,51552,55845,100423062	C3,C4A,C4B,ARPC3,ARPC2,BIN2,RAB14,BRK1,IGLL5
18_Member	GO Biological Processes	GO:0006911	phagocytosis, engulfment	-2.65538	-0.945873	4/123	718,5879,51411,100423062	C3,RAC1,BIN2,IGLL5
19_Summary	Reactome Gene Sets	R-HSA-390522	Striated Muscle Contraction	-4.71511	-2.66784	4/36	70,7168,7169,7170,1345	ACTC1,TPM1,TPM2,TPM3,COX6C
19_Member	Reactome Gene Sets	R-HSA-390522	Striated Muscle Contraction	-4.71511	-2.66784	4/36	70,7168,7169,7170	ACTC1,TPM1,TPM2,TPM3
19_Member	KEGG Pathway	hsa04260	Cardiac muscle contraction	-4.59461	-2.58085	5/78	70,1345,7168,7169,7170	ACTC1,COX6C,TPM1,TPM2,TPM3
19_Member	GO Biological Processes	GO:0030049	muscle filament sliding	-4.57456	-2.56508	4/39	70,7168,7169,7170	ACTC1,TPM1,TPM2,TPM3
19_Member	GO Biological Processes	GO:0033275	actin-myosin filament sliding	-4.57456	-2.56508	4/39	70,7168,7169,7170	ACTC1,TPM1,TPM2,TPM3
19_Member	Reactome Gene Sets	R-HSA-445355	Smooth Muscle Contraction	-3.44844	-1.6304	3/40	7168,7169,7170	TPM1,TPM2,TPM3
19_Member	KEGG Pathway	hsa05410	Hypertrophic cardiomyopathy (HCM)	-3.2904	-1.46265	4/83	70,7168,7169,7170	ACTC1,TPM1,TPM2,TPM3
19_Member	KEGG Pathway	hsa05414	Dilated cardiomyopathy	-3.15753	-1.36217	4/90	70,7168,7169,7170	ACTC1,TPM1,TPM2,TPM3
19_Member	GO Biological Processes	GO:0070252	actin-mediated cell contraction	-2.72106	-1.00293	4/118	70,7168,7169,7170	ACTC1,TPM1,TPM2,TPM3
20_Summary	Reactome Gene Sets	R-HSA-446353	Cell-extracellular matrix interactions	-4.50774	-2.44391	3/18	3611,6251,7408,4831,5341,7791,5879,5908	ILK,RSU1,VASP,NME2,PLEK,ZYX,RAC1,RAP1B
20_Member	Reactome Gene Sets	R-HSA-446353	Cell-extracellular matrix interactions	-4.50774	-2.44391	3/18	3611,6251,7408	ILK,RSU1,VASP
20_Member	GO Biological Processes	GO:0007229	integrin-mediated signaling pathway	-2.87724	-1.13216	4/107	3611,4831,5341,7791	ILK,NME2,PLEK,ZYX
20_Member	KEGG Pathway	hsa04510	Focal adhesion	-2.70971	-0.992664	5/199	3611,5879,5908,7408,7791	ILK,RAC1,RAP1B,VASP,ZYX
20_Member	Canonical Pathways	M3270	ST INTEGRIN SIGNALING PATHWAY	-2.54114	-0.898387	3/82	3611,7408,7791	ILK,VASP,ZYX
20_Member	Reactome Gene Sets	R-HSA-446728	Cell junction organization	-2.4135	-0.794012	3/91	3611,6251,7408	ILK,RSU1,VASP
